# Supplementary material for: Association between gene expression signatures and clinical outcomes of pembrolizumab versus paclitaxel in advanced gastric cancer: exploratory analysis from the randomized, controlled, phase III KEYNOTE-061 trial
Source: PubMed Central journal article supplement — J Immunother Cancer. 2023 Jun 30;11(6):e006920. doi: 10.1136/jitc-2023-006920 (PMC10314681; doi:10.1136/jitc-2023-006920), 2023-06-30
Supplement: jitc-2023-006920supp001.pdf [file jitc-2023-006920supp001.pdf]

1 **Supplementary Appendix for Association Between Gene Expression Signatures and**  
 2 **Clinical Outcomes of Pembrolizumab Versus Paclitaxel in Advanced Gastric Cancer:**  
 3 **Exploratory Analysis From the Randomized, Controlled, Phase III KEYNOTE-061**  
 4 **Trial**

5

6 Authors: Shitara K. et al.

7

8 **Table 1. List of independent ethics committee names and approval dates**

| Country | Protocol # - Site # | IEC name and Address                                                                                                   | List of IEC Approvals of Protocols/ Amendment(s) | Date of IEC Approvals of Protocols/ Amendment(s) |
|---------|---------------------|------------------------------------------------------------------------------------------------------------------------|--------------------------------------------------|--------------------------------------------------|
| Canada  | 3475-061 - 0020     | OCREB - Ontario Cancer Research Ethics Board<br>661 University Avenue<br>MaRS Centre. Suite 510<br>Toronto, ON M5G 0A3 | IRB/IEC Approval of Protocol                     | 14-JUL-2015                                      |
| Canada  | 3475-061 - 0020     | OCREB - Ontario Cancer Research Ethics Board<br>661 University Avenue<br>MaRS Centre. Suite 510<br>Toronto, ON M5G 0A3 | IRB/IEC Approval of Protocol Amendment # 11      | 30-NOV-2017                                      |
| Canada  | 3475-061 - 0020     | OCREB - Ontario Cancer Research Ethics Board<br>661 University Avenue<br>MaRS Centre. Suite 510<br>Toronto, ON M5G 0A3 | IRB/IEC Approval of Protocol Amendment # 13      | 28-DEC-2020                                      |
| Canada  | 3475-061 - 0020     | OCREB - Ontario Cancer Research Ethics Board<br>661 University Avenue<br>MaRS Centre. Suite 510<br>Toronto, ON M5G 0A3 | IRB/IEC Approval of Protocol Amendment # 2       | 29-OCT-2015                                      |
| Canada  | 3475-061 - 0020     | OCREB - Ontario Cancer Research Ethics Board<br>661 University Avenue<br>MaRS Centre. Suite 510<br>Toronto, ON M5G 0A3 | IRB/IEC Approval of Protocol Amendment # 5       | 21-JAN-2016                                      |
| Canada  | 3475-061 - 0020     | OCREB - Ontario Cancer Research Ethics Board<br>661 University Avenue<br>MaRS Centre. Suite 510<br>Toronto, ON M5G 0A3 | IRB/IEC Approval of Protocol Amendment # 7       | 19-JAN-2017                                      |
| Canada  | 3475-061 - 0020     | OCREB - Ontario Cancer Research Ethics Board<br>661 University Avenue<br>MaRS Centre. Suite 510<br>Toronto, ON M5G 0A3 | IRB/IEC Approval of Protocol Amendment # 9       | 16-NOV-2017                                      |
| Canada  | 3475-061 -          | OCREB - Ontario Cancer Research                                                                                        | IRB/IEC                                          | 17-JUL-2015                                      |

|        |                    |                                                                                                                             |                                                              |             |
|--------|--------------------|-----------------------------------------------------------------------------------------------------------------------------|--------------------------------------------------------------|-------------|
|        | 0021               | Ethics Board<br>661 University Avenue<br>MaRS Centre. Suite 510<br>Toronto, ON M5G 0A3                                      | Approval of<br>Protocol                                      |             |
| Canada | 3475-061 -<br>0021 | OCREB - Ontario Cancer Research<br>Ethics Board<br>661 University Avenue<br>MaRS Centre. Suite 510<br>Toronto, ON M5G 0A3   | RB/IEC Approval<br>of Protocol<br>Amendment # 2              | 29-OCT-2015 |
| Canada | 3475-061 -<br>0021 | OCREB - Ontario Cancer Research<br>Ethics Board<br>661 University Avenue<br>MaRS Centre. Suite 510<br>Toronto, ON M5G 0A3   | IRB/IEC<br>Approval of<br>Protocol<br>Amendment # 5          | 21-JAN-2016 |
| Canada | 3475-061 -<br>0021 | OCREB - Ontario Cancer Research<br>Ethics Board<br>661 University Avenue<br>MaRS Centre. Suite 510<br>Toronto, ON M5G 0A3   | IRB/IEC<br>Approval of<br>Protocol<br>Amendment # 7          | 19-JAN-2017 |
| Taiwan | 3475-061 -<br>0048 | National Taiwan University<br>Hospital - Research Ethics<br>Committee<br>No. 7 Chung-Shan South Rd.<br>Taipei, Taipei 10002 | Central IRB/IEC<br>Approval of<br>Protocol<br>Amendment # 12 |             |
| Taiwan | 3475-061 -<br>0048 | National Taiwan University<br>Hospital - Research Ethics<br>Committee<br>No. 7 Chung-Shan South Rd.<br>Taipei, Taipei 10002 | IRB/IEC<br>Approval of<br>Protocol                           | 02-JUN-2015 |
| Taiwan | 3475-061 -<br>0048 | National Taiwan University<br>Hospital - Research Ethics<br>Committee<br>No. 7 Chung-Shan South Rd.<br>Taipei, Taipei 10002 | IRB/IEC<br>Approval of<br>Protocol<br>Amendment # 11         | 23-FEB-2018 |
| Taiwan | 3475-061 -<br>0048 | National Taiwan University<br>Hospital - Research Ethics<br>Committee<br>No. 7 Chung-Shan South Rd.<br>Taipei, Taipei 10002 | IRB/IEC<br>Approval of<br>Protocol<br>Amendment # 12         | 04-MAY-2020 |
| Taiwan | 3475-061 -<br>0048 | National Taiwan University<br>Hospital - Research Ethics<br>Committee<br>No. 7 Chung-Shan South Rd.<br>Taipei, Taipei 10002 | IRB/IEC<br>Approval of<br>Protocol<br>Amendment # 2          | 02-SEP-2015 |
| Taiwan | 3475-061 -<br>0048 | National Taiwan University<br>Hospital - Research Ethics<br>Committee<br>No. 7 Chung-Shan South Rd.<br>Taipei, Taipei 10002 | IRB/IEC<br>Approval of<br>Protocol<br>Amendment # 5          | 08-MAR-2016 |
| Taiwan | 3475-061 -<br>0048 | National Taiwan University<br>Hospital - Research Ethics<br>Committee<br>No. 7 Chung-Shan South Rd.<br>Taipei, Taipei 10002 | IRB/IEC<br>Approval of<br>Protocol<br>Amendment # 7          | 15-DEC-2016 |
| Taiwan | 3475-061 -<br>0048 | National Taiwan University<br>Hospital - Research Ethics<br>Committee<br>No. 7 Chung-Shan South Rd.<br>Taipei, Taipei 10002 | IRB/IEC<br>Approval of<br>Protocol<br>Amendment # 9          | 15-NOV-2017 |
| Taiwan | 3475-061 -         | Chang Gung Medical Foundation                                                                                               | IRB/IEC                                                      | 01-JUN-2015 |

|        |                    |                                                                                                                                                     |                                                              |             |
|--------|--------------------|-----------------------------------------------------------------------------------------------------------------------------------------------------|--------------------------------------------------------------|-------------|
|        | 0049               | Institutional Review Board<br>No. 123, Dung-Hou Rd, Jiou-Lu<br>Tsuen,<br>Kwei-Shan Hsiang,<br>Taoyuan, Taoyuan 333                                  | Approval of<br>Protocol                                      |             |
| Taiwan | 3475-061 -<br>0049 | Chang Gung Medical Foundation<br>Institutional Review Board<br>No. 123, Dung-Hou Rd, Jiou-Lu<br>Tsuen,<br>Kwei-Shan Hsiang,<br>Taoyuan, Taoyuan 333 | IRB/IEC<br>Approval of<br>Protocol<br>Amendment # 11         | 28-MAR-2018 |
| Taiwan | 3475-061 -<br>0049 | Chang Gung Medical Foundation<br>Institutional Review Board<br>No. 123, Dung-Hou Rd, Jiou-Lu<br>Tsuen,<br>Kwei-Shan Hsiang,<br>Taoyuan, Taoyuan 333 | IRB/IEC<br>Approval of<br>Protocol<br>Amendment # 2          | 03-SEP-2015 |
| Taiwan | 3475-061 -<br>0049 | Chang Gung Medical Foundation<br>Institutional Review Board<br>No. 123, Dung-Hou Rd, Jiou-Lu<br>Tsuen,<br>Kwei-Shan Hsiang,<br>Taoyuan, Taoyuan 333 | IRB/IEC<br>Approval of<br>Protocol<br>Amendment # 5          | 24-MAR-2016 |
| Taiwan | 3475-061 -<br>0049 | Chang Gung Medical Foundation<br>Institutional Review Board<br>No. 123, Dung-Hou Rd, Jiou-Lu<br>Tsuen,<br>Kwei-Shan Hsiang,<br>Taoyuan, Taoyuan 333 | IRB/IEC<br>Approval of<br>Protocol<br>Amendment # 7          | 05-DEC-2016 |
| Taiwan | 3475-061 -<br>0049 | Chang Gung Medical Foundation<br>Institutional Review Board<br>No. 123, Dung-Hou Rd, Jiou-Lu<br>Tsuen,<br>Kwei-Shan Hsiang,<br>Taoyuan, Taoyuan 333 | IRB/IEC<br>Approval of<br>Protocol<br>Amendment # 9          | 07-NOV-2017 |
| Taiwan | 3475-061 -<br>0049 | Taipei Veterans General Hospital<br>Ethics Review Committee<br>No. 201 Sec. 2 Shih-Pai Road<br>Taipei, Taipei 112                                   | Central IRB/IEC<br>Approval of<br>Protocol<br>Amendment # 12 |             |
| Taiwan | 3475-061 -<br>0050 | Taipei Veterans General Hospital<br>Ethics Review Committee<br>No. 201 Sec. 2 Shih-Pai Road<br>Taipei, Taipei 112                                   | IRB/IEC<br>Approval of<br>Protocol                           | 02-JUN-2015 |
| Taiwan | 3475-061 -<br>0050 | Taipei Veterans General Hospital<br>Ethics Review Committee<br>No. 201 Sec. 2 Shih-Pai Road<br>Taipei, Taipei 112                                   | IRB/IEC<br>Approval of<br>Protocol<br>Amendment # 2          | 22-JUL-2015 |
| Taiwan | 3475-061 -<br>0050 | Taipei Veterans General Hospital<br>Ethics Review Committee<br>No. 201 Sec. 2 Shih-Pai Road<br>Taipei, Taipei 112                                   | IRB/IEC<br>Approval of<br>Protocol<br>Amendment # 5          | 10-MAR-2016 |
| Taiwan | 3475-061 -<br>0050 | Taipei Veterans General Hospital<br>Ethics Review Committee<br>No. 201 Sec. 2 Shih-Pai Road<br>Taipei, Taipei 112                                   | IRB/IEC<br>Approval of<br>Protocol<br>Amendment # 7          | 30-DEC-2016 |
| Taiwan | 3475-061 -<br>0050 | Taipei Veterans General Hospital<br>Ethics Review Committee<br>No. 201 Sec. 2 Shih-Pai Road<br>Taipei, Taipei 112                                   | IRB/IEC<br>Approval of<br>Protocol<br>Amendment # 9          | 03-NOV-2017 |
| Taiwan | 3475-061 -         | National Cheng Kung University                                                                                                                      | Central IRB/IEC                                              |             |

|             |                    |                                                                                                                         |                                                      |             |
|-------------|--------------------|-------------------------------------------------------------------------------------------------------------------------|------------------------------------------------------|-------------|
|             | 0051               | Hospital<br>6F Outpatient building No 138<br>Sheng-Li Road<br>Ethics Review Committee                                   | Approval of<br>Protocol<br>Amendment # 12            |             |
| Taiwan      | 3475-061 -<br>0051 | National Cheng Kung University<br>Hospital<br>6F Outpatient building No 138<br>Sheng-Li Road<br>Ethics Review Committee | IRB/IEC<br>Approval of<br>Protocol                   | 09-APR-2015 |
| Taiwan      | 3475-061 -<br>0051 | National Cheng Kung University<br>Hospital<br>6F Outpatient building No 138<br>Sheng-Li Road<br>Ethics Review Committee | IRB/IEC<br>Approval of<br>Protocol<br>Amendment # 13 | 16-JUN-2020 |
| Taiwan      | 3475-061 -<br>0051 | National Cheng Kung University<br>Hospital<br>6F Outpatient building No 138<br>Sheng-Li Road<br>Ethics Review Committee | IRB/IEC<br>Approval of<br>Protocol<br>Amendment # 2  | 29-JUL-2015 |
| Taiwan      | 3475-061 -<br>0051 | National Cheng Kung University<br>Hospital<br>6F Outpatient building No 138<br>Sheng-Li Road<br>Ethics Review Committee | IRB/IEC<br>Approval of<br>Protocol<br>Amendment # 5  | 18-MAR-2016 |
| Taiwan      | 3475-061 -<br>0051 | National Cheng Kung University<br>Hospital<br>6F Outpatient building No 138<br>Sheng-Li Road<br>Ethics Review Committee | IRB/IEC<br>Approval of<br>Protocol<br>Amendment # 7  | 18-NOV-2016 |
| Taiwan      | 3475-061 -<br>0051 | National Cheng Kung University<br>Hospital<br>6F Outpatient building No 138<br>Sheng-Li Road<br>Ethics Review Committee | IRB/IEC<br>Approval of<br>Protocol<br>Amendment # 9  | 7-NOV-2017  |
| South Korea | 3475-061 -<br>0064 | The Catholic University of Korea<br>IRB<br>222 Banpo daero Seocho gu<br>Seoul, Seoul 06591<br>South Korea               | IRB/IEC<br>Approval of<br>Protocol                   | 30-APR-2015 |
| South Korea | 3475-061 -<br>0064 | The Catholic University of Korea<br>IRB<br>222 Banpo daero Seocho gu<br>Seoul, Seoul 06591<br>South Korea               | IRB/IEC<br>Approval of<br>Protocol<br>Amendment # 2  | 15-JUL-2015 |
| South Korea | 3475-061 -<br>0064 | The Catholic University of Korea<br>IRB<br>222 Banpo daero Seocho gu<br>Seoul, Seoul 06591<br>South Korea               | IRB/IEC<br>Approval of<br>Protocol<br>Amendment # 5  | 20-JAN-2016 |
| South Korea | 3475-061 -<br>0064 | The Catholic University of Korea<br>IRB<br>222 Banpo daero Seocho gu<br>Seoul, Seoul 06591<br>South Korea               | IRB/IEC<br>Approval of<br>Protocol<br>Amendment # 7  | 07-DEC-2016 |
| South Korea | 3475-061 -<br>0064 | The Catholic University of Korea<br>IRB<br>222 Banpo daero Seocho gu<br>Seoul, Seoul 06591<br>South Korea               | IRB/IEC<br>Approval of<br>Protocol<br>Amendment # 9  | 02-NOV-2017 |
| South Korea | 3475-061 -         | Samsung Medical Center IRB/IEC                                                                                          | IRB/IEC                                              | 11-MAY-2015 |

|             |                    |                                                                                                                            |                                                      |             |
|-------------|--------------------|----------------------------------------------------------------------------------------------------------------------------|------------------------------------------------------|-------------|
|             | 0065               | 81, Irwon-Ro, Gangnam-Gu<br>IRB, 9 Floor, Main Bld.<br>Seoul, Seoul 06351<br>South Korea                                   | Approval of<br>Protocol                              |             |
| South Korea | 3475-061 -<br>0065 | Samsung Medical Center IRB/IEC<br>81, Irwon-Ro, Gangnam-Gu<br>IRB, 9 Floor, Main Bld.<br>Seoul, Seoul 06351<br>South Korea | IRB/IEC<br>Approval of<br>Protocol<br>Amendment # 11 | 25-JAN-2018 |
| South Korea | 3475-061 -<br>0065 | Samsung Medical Center IRB/IEC<br>81, Irwon-Ro, Gangnam-Gu<br>IRB, 9 Floor, Main Bld.<br>Seoul, Seoul 06351<br>South Korea | IRB/IEC<br>Approval of<br>Protocol<br>Amendment # 2  | 15-JUL-2015 |
| South Korea | 3475-061 -<br>0065 | Samsung Medical Center IRB/IEC<br>81, Irwon-Ro, Gangnam-Gu<br>IRB, 9 Floor, Main Bld.<br>Seoul, Seoul 06351<br>South Korea | IRB/IEC<br>Approval of<br>Protocol<br>Amendment # 5  | 12-FEB-2016 |
| South Korea | 3475-061 -<br>0065 | Samsung Medical Center IRB/IEC<br>81, Irwon-Ro, Gangnam-Gu<br>IRB, 9 Floor, Main Bld.<br>Seoul, Seoul 06351<br>South Korea | IRB/IEC<br>Approval of<br>Protocol<br>Amendment # 7  | 01-DEC-2016 |
| South Korea | 3475-061 - 0065    | Samsung Medical Center IRB/IEC<br>81, Irwon-Ro, Gangnam-Gu<br>IRB, 9 Floor, Main Bld.<br>Seoul, Seoul 06351<br>South Korea | IRB/IEC<br>Approval of<br>Protocol<br>Amendment # 9  | 13-OCT-2017 |
| South Korea | 3475-061 -<br>0066 | Korea University Anam Hospital<br>IRB<br>73 Incheon-ro Seongbuk-gu<br>Seoul, Seoul 02841<br>South Korea                    | IRB/IEC<br>Approval of<br>Protocol                   | 26-MAR-2015 |
| South Korea | 3475-061 -<br>0066 | Korea University Anam Hospital<br>IRB<br>73 Incheon-ro Seongbuk-gu<br>Seoul, Seoul 02841<br>South Korea                    | IRB/IEC<br>Approval of<br>Protocol<br>Amendment # 2  | 13-JUL-2015 |
| South Korea | 3475-061 -<br>0066 | Korea University Anam Hospital<br>IRB<br>73 Incheon-ro Seongbuk-gu<br>Seoul, Seoul 02841<br>South Korea                    | IRB/IEC<br>Approval of<br>Protocol<br>Amendment # 5  | 24-DEC-2015 |
| South Korea | 3475-061 -<br>0066 | Korea University Anam Hospital<br>IRB<br>73 Incheon-ro Seongbuk-gu<br>Seoul, Seoul 02841<br>South Korea                    | IRB/IEC<br>Approval of<br>Protocol<br>Amendment # 7  | 01-DEC-2016 |
| South Korea | 3475-061 -<br>0066 | Korea University Anam Hospital<br>IRB<br>73 Incheon-ro Seongbuk-gu<br>Seoul, Seoul 02841<br>South Korea                    | IRB/IEC<br>Approval of<br>Protocol<br>Amendment # 9  | 02-OCT-2017 |
| South Korea | 3475-061 -<br>0066 | Korea University Anam Hospital<br>IRB<br>73 Incheon-ro Seongbuk-gu<br>Seoul, Seoul 02841<br>South Korea                    | IRB/IEC<br>Approval of<br>Protocol                   | 06-APR-2015 |
| South Korea | 3475-061 -         | Seoul National University Hospital                                                                                         | IRB/IEC                                              | 30-JAN-2018 |

|             |                    |                                                                                                                                                                  |                                                     |             |
|-------------|--------------------|------------------------------------------------------------------------------------------------------------------------------------------------------------------|-----------------------------------------------------|-------------|
|             | 0067               | IRB/IEC<br>101 Daehak-ro,Jongno-gu<br>Human Research Protection<br>Program Center (HRPP),<br>Biomedical Research Institute                                       | Approval of<br>Protocol<br>Amendment # 11           |             |
| South Korea | 3475-061 -<br>0067 | Seoul National University Hospital<br>IRB/IEC<br>101 Daehak-ro,Jongno-gu<br>Human Research Protection<br>Program Center (HRPP),<br>Biomedical Research Institute | IRB/IEC<br>Approval of<br>Protocol<br>Amendment # 2 | 06-JUL-2015 |
| South Korea | 3475-061 -<br>0067 | Seoul National University Hospital<br>IRB/IEC<br>101 Daehak-ro,Jongno-gu<br>Human Research Protection<br>Program Center (HRPP),<br>Biomedical Research Institute | IRB/IEC<br>Approval of<br>Protocol<br>Amendment # 5 | 11-FEB-2016 |
| South Korea | 3475-061 -<br>0067 | Seoul National University Hospital<br>IRB/IEC<br>101 Daehak-ro,Jongno-gu<br>Human Research Protection<br>Program Center (HRPP),<br>Biomedical Research Institute | IRB/IEC<br>Approval of<br>Protocol<br>Amendment # 7 | 28-NOV-2016 |
| South Korea | 3475-061 -<br>0067 | Seoul National University Hospital<br>IRB/IEC<br>101 Daehak-ro,Jongno-gu<br>Human Research Protection<br>Program Center (HRPP),<br>Biomedical Research Institute | IRB/IEC<br>Approval of<br>Protocol<br>Amendment # 9 | 12-OCT-2017 |
| South Korea | 3475-061 -<br>0068 | Yonsei University Health System,<br>Severance Hospital IRB<br>50-1 Yonsei-ro. Seodaemun gu<br>Study coordinator room 15A Ward<br>1F Chejung building             | IRB/IEC<br>Approval of<br>Protocol                  | 19-MAR-2015 |
| South Korea | 3475-061 -<br>0068 | Yonsei University Health System,<br>Severance Hospital IRB<br>50-1 Yonsei-ro. Seodaemun gu<br>Study coordinator room 15A Ward<br>1F Chejung building             | IRB/IEC<br>Approval of<br>Protocol<br>Amendment # 2 | 14-JUL-2015 |
| South Korea | 3475-061 -<br>0068 | Yonsei University Health System,<br>Severance Hospital IRB<br>50-1 Yonsei-ro. Seodaemun gu<br>Study coordinator room 15A Ward<br>1F Chejung building             | IRB/IEC<br>Approval of<br>Protocol<br>Amendment # 5 | 21-JAN-2016 |
| South Korea | 3475-061 -<br>0068 | Yonsei University Health System,<br>Severance Hospital IRB<br>50-1 Yonsei-ro. Seodaemun gu<br>Study coordinator room 15A Ward<br>1F Chejung building             | IRB/IEC<br>Approval of<br>Protocol<br>Amendment # 7 | 19-NOV-2016 |
| South Korea | 3475-061 -<br>0068 | Yonsei University Health System,<br>Severance Hospital IRB<br>50-1 Yonsei-ro. Seodaemun gu<br>Study coordinator room 15A Ward<br>1F Chejung building             | IRB/IEC<br>Approval of<br>Protocol<br>Amendment # 9 | 02-NOV-2017 |
| South Korea | 3475-061 -<br>0069 | Asan Medical Center IRB/IEC<br>88, Olympic-ro 43-gil, Songpa-gu<br>2F Asan Life Sciences Office 1<br>Seoul, Seoul 05505<br>South Korea                           | IRB/IEC<br>Approval of<br>Protocol                  | 17-APR-2015 |
| South Korea | 3475-061 -         | Asan Medical Center IRB/IEC                                                                                                                                      | IRB/IEC                                             | 01-FEB-2018 |

|             |                    |                                                                                                                                                         |                                                      |             |
|-------------|--------------------|---------------------------------------------------------------------------------------------------------------------------------------------------------|------------------------------------------------------|-------------|
|             | 0069               | 88, Olympic-ro 43-gil, Songpa-gu<br>2F Asan Life Sciences Office 1<br>Seoul, Seoul 05505<br>South Korea                                                 | Approval of<br>Protocol<br>Amendment # 11            |             |
| South Korea | 3475-061 -<br>0069 | Asan Medical Center IRB/IEC<br>88, Olympic-ro 43-gil, Songpa-gu<br>2F Asan Life Sciences Office 1<br>Seoul, Seoul 05505<br>South Korea                  | IRB/IEC<br>Approval of<br>Protocol<br>Amendment # 2  | 13-AUG-2015 |
| South Korea | 3475-061 -<br>0069 | Asan Medical Center IRB/IEC<br>88, Olympic-ro 43-gil, Songpa-gu<br>2F Asan Life Sciences Office 1<br>Seoul, Seoul 05505<br>South Korea                  | IRB/IEC<br>Approval of<br>Protocol<br>Amendment # 5  | 15-JAN-2016 |
| South Korea | 3475-061 -<br>0069 | Asan Medical Center IRB/IEC<br>88, Olympic-ro 43-gil, Songpa-gu<br>2F Asan Life Sciences Office 1<br>Seoul, Seoul 05505<br>South Korea                  | IRB/IEC<br>Approval of<br>Protocol<br>Amendment # 7  | 16-DEC-2016 |
| South Korea | 3475-061 -<br>0069 | Asan Medical Center IRB/IEC<br>88, Olympic-ro 43-gil, Songpa-gu<br>2F Asan Life Sciences Office 1<br>Seoul, Seoul 05505<br>South Korea                  | IRB/IEC<br>Approval of<br>Protocol<br>Amendment # 9  | 27-OCT-2017 |
| Singapore   | 3475-061 -<br>0088 | Domain Specific Review Board<br>(DSRB)<br>Nexus @One-North (South Tower)<br>No. 3<br>Fusionopolis Link #03-08<br>Singapore, Central Singapore<br>138543 | IRB/IEC<br>Approval of<br>Protocol                   | 04-MAY-2015 |
| Singapore   | 3475-061 -<br>0088 | Domain Specific Review Board<br>(DSRB)<br>Nexus @One-North (South Tower)<br>No. 3<br>Fusionopolis Link #03-08<br>Singapore, Central Singapore<br>138543 | IRB/IEC<br>Approval of<br>Protocol<br>Amendment # 11 | 19-APR-2018 |
| Singapore   | 3475-061 -<br>0088 | Domain Specific Review Board<br>(DSRB)<br>Nexus @One-North (South Tower)<br>No. 3<br>Fusionopolis Link #03-08<br>Singapore, Central Singapore<br>138543 | IRB/IEC<br>Approval of<br>Protocol<br>Amendment # 2  | 11-AUG-2015 |
| Singapore   | 3475-061 -<br>0088 | Domain Specific Review Board<br>(DSRB)<br>Nexus @One-North (South Tower)<br>No. 3<br>Fusionopolis Link #03-08<br>Singapore, Central Singapore<br>138543 | IRB/IEC<br>Approval of<br>Protocol<br>Amendment # 5  | 25-JAN-2016 |
| Singapore   | 3475-061 -<br>0088 | Domain Specific Review Board<br>(DSRB)<br>Nexus @One-North (South Tower)<br>No. 3<br>Fusionopolis Link #03-08<br>Singapore, Central Singapore<br>138543 | IRB/IEC<br>Approval of<br>Protocol<br>Amendment # 7  | 24-JAN-2017 |
| Singapore   | 3475-061 -         | Domain Specific Review Board                                                                                                                            | IRB/IEC                                              | 19-APR-2018 |



|           |                    |                                                                                                                                                                                                                                                                                     |                                                      |             |
|-----------|--------------------|-------------------------------------------------------------------------------------------------------------------------------------------------------------------------------------------------------------------------------------------------------------------------------------|------------------------------------------------------|-------------|
|           | 0088               | (DSRB)<br>Nexus @One-North (South Tower)<br>No. 3<br>Fusionopolis Link #03-08<br>Singapore, Central Singapore<br>138543                                                                                                                                                             | Approval of<br>Protocol<br>Amendment # 9             |             |
| Singapore | 3475-061 -<br>0089 | Domain Specific Review Board<br>(DSRB)<br>Nexus @One-North (South Tower)<br>No. 3<br>Fusionopolis Link #03-08<br>Singapore, Central Singapore<br>138543                                                                                                                             | IRB/IEC<br>Approval of<br>Protocol                   | 04-MAY-2015 |
| Singapore | 3475-061 -<br>0089 | Domain Specific Review Board<br>(DSRB)<br>Nexus @One-North (South Tower)<br>No. 3<br>Fusionopolis Link #03-08<br>Singapore, Central Singapore<br>138543                                                                                                                             | IRB/IEC<br>Approval of<br>Protocol<br>Amendment # 11 | 19-APR-2018 |
| Singapore | 3475-061 -<br>0089 | Domain Specific Review Board<br>(DSRB)<br>Nexus @One-North (South Tower)<br>No. 3<br>Fusionopolis Link #03-08<br>Singapore, Central Singapore<br>138543                                                                                                                             | IRB/IEC<br>Approval of<br>Protocol<br>Amendment # 2  | 11-AUG-2015 |
| Singapore | 3475-061 -<br>0089 | Domain Specific Review Board<br>(DSRB)<br>Nexus @One-North (South Tower)<br>No. 3<br>Fusionopolis Link #03-08<br>Singapore, Central Singapore<br>138543                                                                                                                             | IRB/IEC<br>Approval of<br>Protocol<br>Amendment # 5  | 25-JAN-2016 |
| Singapore | 3475-061 -<br>0089 | Domain Specific Review Board<br>(DSRB)<br>Nexus @One-North (South Tower)<br>No. 3<br>Fusionopolis Link #03-08<br>Singapore, Central Singapore<br>138543                                                                                                                             | IRB/IEC<br>Approval of<br>Protocol<br>Amendment # 7  | 24-JAN-2017 |
| Singapore | 3475-061 -<br>0089 | Domain Specific Review Board<br>(DSRB)<br>Nexus @One-North (South Tower)<br>No. 3<br>Fusionopolis Link #03-08<br>Singapore, Central Singapore<br>138543                                                                                                                             | IRB/IEC<br>Approval of<br>Protocol<br>Amendment # 9  | 19-APR-2018 |
| Malaysia  | 3475-061 -<br>0118 | Medical Ethics Committee<br>(UMMC)<br>University Malaya Medical Centre<br>(UMMC)<br>Lembah Pantai<br>Kuala Lumpur, Kelantan 59100<br>Malaysia<br>Medical Research Ethics<br>Committee (MREC)<br>Kompleks Pendidikan Sains<br>Kejururawatan (KPSK) Tingkat 2<br>Pusat Perubatan Univ | IRB/IEC<br>Approval of<br>Protocol                   | 05-MAY-2015 |



|          |                 |                                                                                                                                                                                                                                                                                            |                                                      |             |
|----------|-----------------|--------------------------------------------------------------------------------------------------------------------------------------------------------------------------------------------------------------------------------------------------------------------------------------------|------------------------------------------------------|-------------|
|          |                 | Malaya(PPUM)                                                                                                                                                                                                                                                                               |                                                      |             |
| Malaysia | 3475-061 - 0118 | Medical Ethics Committee (UMMC)<br>University Malaya Medical Centre (UMMC)<br>Lembah Pantai<br>Kuala Lumpur, Kelantan 59100<br>Malaysia<br>Medical Research Ethics Committee (MREC)<br>Kompleks Pendidikan Sains<br>Kejururawatan (KPSK) Tingkat 2<br>Pusat Perubatan Univ<br>Malaya(PPUM) | IRB/IEC<br>Approval of<br>Protocol<br>Amendment # 11 | 10-JAN-2018 |
| Malaysia | 3475-061 - 0118 | Medical Ethics Committee (UMMC)<br>University Malaya Medical Centre (UMMC)<br>Lembah Pantai<br>Kuala Lumpur, Kelantan 59100<br>Malaysia<br>Medical Research Ethics Committee (MREC)<br>Kompleks Pendidikan Sains<br>Kejururawatan (KPSK) Tingkat 2<br>Pusat Perubatan Univ<br>Malaya(PPUM) | IRB/IEC<br>Approval of<br>Protocol<br>Amendment # 12 | 29-MAY-2020 |
| Malaysia | 3475-061 - 0118 | Medical Ethics Committee (UMMC)<br>University Malaya Medical Centre (UMMC)<br>Lembah Pantai<br>Kuala Lumpur, Kelantan 59100<br>Malaysia<br>Medical Research Ethics Committee (MREC)<br>Kompleks Pendidikan Sains<br>Kejururawatan (KPSK) Tingkat 2<br>Pusat Perubatan Univ<br>Malaya(PPUM) | RB/IEC Approval<br>of Protocol<br>Amendment # 2      | 09-JUL-2015 |
| Malaysia | 3475-061 - 0118 | Medical Ethics Committee (UMMC)<br>University Malaya Medical Centre (UMMC)<br>Lembah Pantai<br>Kuala Lumpur, Kelantan 59100<br>Malaysia<br>Medical Research Ethics Committee (MREC)<br>Kompleks Pendidikan Sains<br>Kejururawatan (KPSK) Tingkat 2<br>Pusat Perubatan Univ<br>Malaya(PPUM) | IRB/IEC<br>Approval of<br>Protocol<br>Amendment # 5  | 12-JAN-2016 |
| Malaysia | 3475-061 - 0118 | Medical Ethics Committee (UMMC)<br>University Malaya Medical Centre (UMMC)<br>Lembah Pantai<br>Kuala Lumpur, Kelantan 59100<br>Malaysia                                                                                                                                                    | IRB/IEC<br>Approval of<br>Protocol<br>Amendment # 7  | 22-NOV-2016 |

|          |                    |                                                                                                                                                                                                                                                                                            |                                                      |             |
|----------|--------------------|--------------------------------------------------------------------------------------------------------------------------------------------------------------------------------------------------------------------------------------------------------------------------------------------|------------------------------------------------------|-------------|
|          |                    | Medical Research Ethics Committee (MREC)<br>Kompleks Pendidikan Sains<br>Kejururawatan (KPSK) Tingkat 2<br>Pusat Perubatan Univ<br>Malaya(PPUM)                                                                                                                                            |                                                      |             |
| Malaysia | 3475-061 -<br>0118 | Medical Ethics Committee (UMMC)<br>University Malaya Medical Centre (UMMC)<br>Lembah Pantai<br>Kuala Lumpur, Kelantan 59100<br>Malaysia<br>Medical Research Ethics Committee (MREC)<br>Kompleks Pendidikan Sains<br>Kejururawatan (KPSK) Tingkat 2<br>Pusat Perubatan Univ<br>Malaya(PPUM) | IRB/IEC<br>Approval of<br>Protocol<br>Amendment # 9  | 12-OCT-2017 |
| Japan    | 3475-061 -<br>0128 | Aichi Cancer Center Hospital<br>Institutional Review Board<br>1-1, Kanokoden, Chikusa-ku<br>Nagoya, Aichi 464-8681                                                                                                                                                                         | IRB/IEC<br>Approval of<br>Protocol                   | 28-MAY-2015 |
| Japan    | 3475-061 -<br>0128 | Aichi Cancer Center Hospital<br>Institutional Review Board<br>1-1, Kanokoden, Chikusa-ku<br>Nagoya, Aichi 464-8681                                                                                                                                                                         | IRB/IEC<br>Approval of<br>Protocol<br>Amendment # 11 | 25-JAN-2018 |
| Japan    | 3475-061 -<br>0128 | Aichi Cancer Center Hospital<br>Institutional Review Board<br>1-1, Kanokoden, Chikusa-ku<br>Nagoya, Aichi 464-8681                                                                                                                                                                         | IRB/IEC<br>Approval of<br>Protocol<br>Amendment # 13 | 25-JUN-2020 |
| Japan    | 3475-061 -<br>0128 | Aichi Cancer Center Hospital<br>Institutional Review Board<br>1-1, Kanokoden, Chikusa-ku<br>Nagoya, Aichi 464-8681                                                                                                                                                                         | IRB/IEC<br>Approval of<br>Protocol<br>Amendment # 2  | 27-AUG-2015 |
| Japan    | 3475-061 -<br>0128 | Aichi Cancer Center Hospital<br>Institutional Review Board<br>1-1, Kanokoden, Chikusa-ku<br>Nagoya, Aichi 464-8681                                                                                                                                                                         | IRB/IEC<br>Approval of<br>Protocol<br>Amendment # 5  | 24-MAR-2016 |
| Japan    | 3475-061 -<br>0128 | Aichi Cancer Center Hospital<br>Institutional Review Board<br>1-1, Kanokoden, Chikusa-ku<br>Nagoya, Aichi 464-8681                                                                                                                                                                         | IRB/IEC<br>Approval of<br>Protocol<br>Amendment # 7  | 26-JAN-2017 |
| Japan    | 3475-061 -<br>0128 | Aichi Cancer Center Hospital<br>Institutional Review Board<br>1-1, Kanokoden, Chikusa-ku<br>Nagoya, Aichi 464-8681                                                                                                                                                                         | IRB/IEC<br>Approval of<br>Protocol<br>Amendment # 9  | 30-NOV-2017 |
| Japan    | 3475-061 -<br>0129 | Saitama Cancer Center<br>Institutional Review Board<br>780 Komuro, Inamachi<br>Kitaadachi-gun, Saitama 362-0806                                                                                                                                                                            | IRB/IEC<br>Approval of<br>Protocol                   | 26-MAY-2015 |
| Japan    | 3475-061 -<br>0129 | Saitama Cancer Center<br>Institutional Review Board<br>780 Komuro, Inamachi<br>Kitaadachi-gun, Saitama 362-0806                                                                                                                                                                            | IRB/IEC<br>Approval of<br>Protocol<br>Amendment # 11 | 27-FEB-2018 |
| Japan    | 3475-061 -<br>0129 | Saitama Cancer Center<br>Institutional Review Board                                                                                                                                                                                                                                        | IRB/IEC<br>Approval of                               | 21-JUL-2020 |

|       |                    |                                                                                                                        |                                                      |             |
|-------|--------------------|------------------------------------------------------------------------------------------------------------------------|------------------------------------------------------|-------------|
|       |                    | 780 Komuro, Inamachi<br>Kitaadachi-gun, Saitama 362-0806                                                               | Protocol<br>Amendment # 13                           |             |
| Japan | 3475-061 -<br>0129 | Saitama Cancer Center<br>Institutional Review Board<br>780 Komuro, Inamachi<br>Kitaadachi-gun, Saitama 362-0806        | IRB/IEC<br>Approval of<br>Protocol<br>Amendment # 2  | 29-SEP-2015 |
| Japan | 3475-061 -<br>0129 | Saitama Cancer Center<br>Institutional Review Board<br>780 Komuro, Inamachi<br>Kitaadachi-gun, Saitama 362-0806        | IRB/IEC<br>Approval of<br>Protocol<br>Amendment # 5  | 23-MAR-2016 |
| Japan | 3475-061 -<br>0129 | Saitama Cancer Center<br>Institutional Review Board<br>780 Komuro, Inamachi<br>Kitaadachi-gun, Saitama 362-0806        | IRB/IEC<br>Approval of<br>Protocol<br>Amendment # 7  | 27-DEC-2016 |
| Japan | 3475-061 -<br>0129 | Saitama Cancer Center<br>Institutional Review Board<br>780 Komuro, Inamachi<br>Kitaadachi-gun, Saitama 362-0806        | IRB/IEC<br>Approval of<br>Protocol<br>Amendment # 9  | 21-NOV-2017 |
| Japan | 3475-061 -<br>0130 | National Cancer Ctr IRB #2-J<br>5-1-1, Tsukiji, Chuo-ku<br>Tokyo, Tokyo 104-0045<br>Japan                              | IRB/IEC<br>Approval of<br>Protocol                   | 10-JUN-2015 |
| Japan | 3475-061 -<br>0130 | National Cancer Ctr IRB #2-J<br>5-1-1, Tsukiji, Chuo-ku<br>Tokyo, Tokyo 104-0045<br>Japan                              | IRB/IEC<br>Approval of<br>Protocol<br>Amendment # 13 | 01-JUL-2020 |
| Japan | 3475-061 -<br>0130 | National Cancer Ctr IRB #2-J<br>5-1-1, Tsukiji, Chuo-ku<br>Tokyo, Tokyo 104-0045<br>Japan                              | IRB/IEC<br>Approval of<br>Protocol<br>Amendment # 2  | 29-JUL-2015 |
| Japan | 3475-061 -<br>0130 | National Cancer Ctr IRB #2-J<br>5-1-1, Tsukiji, Chuo-ku<br>Tokyo, Tokyo 104-0045<br>Japan                              | IRB/IEC<br>Approval of<br>Protocol<br>Amendment # 5  | 17-FEB-2016 |
| Japan | 3475-061 -<br>0130 | National Cancer Ctr IRB #2-J<br>5-1-1, Tsukiji, Chuo-ku<br>Tokyo, Tokyo 104-0045<br>Japan                              | IRB/IEC<br>Approval of<br>Protocol<br>Amendment # 7  | 14-DEC-2016 |
| Japan | 3475-061 -<br>0130 | National Cancer Ctr IRB #2-J<br>5-1-1, Tsukiji, Chuo-ku<br>Tokyo, Tokyo 104-0045<br>Japan                              | IRB/IEC<br>Approval of<br>Protocol<br>Amendment # 9  | 18-OCT-2017 |
| Japan | 3475-061 -<br>0131 | Institutional Review Board of<br>Cancer Institute Hospital of JFCR<br>3-8-31, Ariake, Koto-ku<br>Tokyo, Tokyo 135-8550 | IRB/IEC<br>Approval of<br>Protocol                   | 24-JUN-2015 |
| Japan | 3475-061 -<br>0131 | Institutional Review Board of<br>Cancer Institute Hospital of JFCR<br>3-8-31, Ariake, Koto-ku<br>Tokyo, Tokyo 135-8550 | IRB/IEC<br>Approval of<br>Protocol<br>Amendment # 11 | 07-FEB-2018 |
| Japan | 3475-061 -<br>0131 | Institutional Review Board of<br>Cancer Institute Hospital of JFCR<br>3-8-31, Ariake, Koto-ku<br>Tokyo, Tokyo 135-8550 | IRB/IEC<br>Approval of<br>Protocol<br>Amendment # 2  | 05-AUG-2015 |
| Japan | 3475-061 -<br>0131 | Institutional Review Board of<br>Cancer Institute Hospital of JFCR<br>3-8-31, Ariake, Koto-ku<br>Tokyo, Tokyo 135-8550 | IRB/IEC<br>Approval of<br>Protocol<br>Amendment # 5  | 03-FEB-2016 |

|       |                 |                                                                                                                 |                                            |             |
|-------|-----------------|-----------------------------------------------------------------------------------------------------------------|--------------------------------------------|-------------|
| Japan | 3475-061 - 0131 | Institutional Review Board of Cancer Institute Hospital of JFCR 3-8-31, Ariake, Koto-ku Tokyo, Tokyo 135-8550   | IRB/IEC Approval of Protocol Amendment # 7 | 14-DEC-2016 |
| Japan | 3475-061 - 0131 | Institutional Review Board of Cancer Institute Hospital of JFCR 3-8-31, Ariake, Koto-ku Tokyo, Tokyo 135-8550   | IRB/IEC Approval of Protocol Amendment # 9 | 08-NOV-2017 |
| Japan | 3475-061 - 0132 | National Hospital Organization Shikoku Cancer Center IRB 160 Kou, Minamiumemoto-machi Matsuyama, Ehime 791-0280 | IRB/IEC Approval of Protocol               | 18-JUN-2015 |
| Japan | 3475-061 - 0132 | National Hospital Organization Shikoku Cancer Center IRB 160 Kou, Minamiumemoto-machi Matsuyama, Ehime 791-0280 | IRB/IEC Approval of Protocol Amendment # 2 | 28-JUL-2015 |
| Japan | 3475-061 - 0132 | National Hospital Organization Shikoku Cancer Center IRB 160 Kou, Minamiumemoto-machi Matsuyama, Ehime 791-0280 | IRB/IEC Approval of Protocol Amendment # 5 | 17-FEB-2016 |
| Japan | 3475-061 - 0132 | National Hospital Organization Shikoku Cancer Center IRB 160 Kou, Minamiumemoto-machi Matsuyama, Ehime 791-0280 | IRB/IEC Approval of Protocol Amendment # 7 | 21-DEC-2016 |
| Japan | 3475-061 - 0132 | National Hospital Organization Shikoku Cancer Center IRB 160 Kou, Minamiumemoto-machi Matsuyama, Ehime 791-0280 | IRB/IEC Approval of Protocol Amendment # 9 | 22-NOV-2017 |
| Japan | 3475-061 - 0133 | Hokkaido University Hospital Institutional Review Board 5, Kita 14jo-Nishi, Kita-ku Sapporo, Hokkaido 060-8648  | IRB/IEC Approval of Protocol               | 19-MAY-2015 |
| Japan | 3475-061 - 0133 | Hokkaido University Hospital Institutional Review Board 5, Kita 14jo-Nishi, Kita-ku Sapporo, Hokkaido 060-8648  | IRB/IEC Approval of Protocol Amendment # 2 | 25-AUG-2015 |
| Japan | 3475-061 - 0133 | Hokkaido University Hospital Institutional Review Board 5, Kita 14jo-Nishi, Kita-ku Sapporo, Hokkaido 060-8648  | IRB/IEC Approval of Protocol Amendment # 5 | 15-MAR-2016 |
| Japan | 3475-061 - 0133 | Hokkaido University Hospital Institutional Review Board 5, Kita 14jo-Nishi, Kita-ku Sapporo, Hokkaido 060-8648  | IRB/IEC Approval of Protocol Amendment # 7 | 17-JAN-2017 |
| Japan | 3475-061 - 0133 | Hokkaido University Hospital Institutional Review Board 5, Kita 14jo-Nishi, Kita-ku Sapporo, Hokkaido 060-8648  | IRB/IEC Approval of Protocol Amendment # 9 | 21-NOV-2017 |
| Japan | 3475-061 - 0134 | Shizuoka Cancer Ctr IRB #2 1007, Shimonagakubo, Nagaizumi-cho Sunto-gun, Shizuoka 411-8777 Japan                | IRB/IEC Approval of Protocol               | 30-JUL-2015 |
| Japan | 3475-061 - 0134 | Shizuoka Cancer Ctr IRB #2 1007, Shimonagakubo, Nagaizumi-cho                                                   | IRB/IEC Approval of Protocol               | 29-JAN-2018 |

|       |                    |                                                                                                               |                                                      |             |
|-------|--------------------|---------------------------------------------------------------------------------------------------------------|------------------------------------------------------|-------------|
|       |                    | Sunto-gun, Shizuoka 411-8777<br>Japan                                                                         | Amendment # 11                                       |             |
| Japan | 3475-061 -<br>0134 | Shizuoka Cancer Ctr IRB #2<br>1007, Shimonagakubo, Nagaizumi-<br>cho<br>Sunto-gun, Shizuoka 411-8777<br>Japan | IRB/IEC<br>Approval of<br>Protocol<br>Amendment # 13 | 29-JUN-2020 |
| Japan | 3475-061 -<br>0134 | Shizuoka Cancer Ctr IRB #2<br>1007, Shimonagakubo, Nagaizumi-<br>cho<br>Sunto-gun, Shizuoka 411-8777<br>Japan | IRB/IEC<br>Approval of<br>Protocol<br>Amendment # 2  | 30-JUL-2015 |
| Japan | 3475-061 -<br>0134 | Shizuoka Cancer Ctr IRB #2<br>1007, Shimonagakubo, Nagaizumi-<br>cho<br>Sunto-gun, Shizuoka 411-8777<br>Japan | IRB/IEC<br>Approval of<br>Protocol<br>Amendment # 5  | 18-FEB-2016 |
| Japan | 3475-061 -<br>0134 | Shizuoka Cancer Ctr IRB #2<br>1007, Shimonagakubo, Nagaizumi-<br>cho<br>Sunto-gun, Shizuoka 411-8777<br>Japan | IRB/IEC<br>Approval of<br>Protocol<br>Amendment # 7  | 27-DEC-2016 |
| Japan | 3475-061 -<br>0134 | Shizuoka Cancer Ctr IRB #2<br>1007, Shimonagakubo, Nagaizumi-<br>cho<br>Sunto-gun, Shizuoka 411-8777<br>Japan | IRB/IEC Approval<br>of Protocol<br>Amendment # 9     | 27-NOV-2017 |
| Japan | 3475-061 -<br>0135 | Chiba Cancer Center Institutional<br>Review Board<br>666-2, Nitona-cho, Chuou-ku<br>Chiba, Chiba 260-8717     | IRB/IEC<br>Approval of<br>Protocol                   | 13-MAY-2015 |
| Japan | 3475-061 -<br>0135 | Chiba Cancer Center Institutional<br>Review Board<br>666-2, Nitona-cho, Chuou-ku<br>Chiba, Chiba 260-8717     | IRB/IEC<br>Approval of<br>Protocol<br>Amendment # 11 | 14-FEB-2018 |
| Japan | 3475-061 -<br>0135 | Chiba Cancer Center Institutional<br>Review Board<br>666-2, Nitona-cho, Chuou-ku<br>Chiba, Chiba 260-8717     | IRB/IEC<br>Approval of<br>Protocol<br>Amendment # 13 | 10-JUN-2020 |
| Japan | 3475-061 -<br>0135 | Chiba Cancer Center Institutional<br>Review Board<br>666-2, Nitona-cho, Chuou-ku<br>Chiba, Chiba 260-8717     | IRB/IEC<br>Approval of<br>Protocol<br>Amendment # 2  | 12-AUG-2015 |
| Japan | 3475-061 -<br>0135 | Chiba Cancer Center Institutional<br>Review Board<br>666-2, Nitona-cho, Chuou-ku<br>Chiba, Chiba 260-8717     | IRB/IEC<br>Approval of<br>Protocol<br>Amendment # 5  | 09-MAR-2016 |
| Japan | 3475-061 -<br>0135 | Chiba Cancer Center Institutional<br>Review Board<br>666-2, Nitona-cho, Chuou-ku<br>Chiba, Chiba 260-8717     | IRB/IEC<br>Approval of<br>Protocol<br>Amendment # 7  | 14-DEC-2016 |
| Japan | 3475-061 -<br>0135 | Chiba Cancer Center Institutional<br>Review Board<br>666-2, Nitona-cho, Chuou-ku<br>Chiba, Chiba 260-8717     | IRB/IEC<br>Approval of<br>Protocol<br>Amendment # 9  | 15-NOV-2017 |
| Japan | 3475-061 -<br>0136 | Institutional Review Board of<br>Osaka University Hospital2-15,<br>Yamadaoka<br>Suita, Osaka 565-0871         | IRB/IEC<br>Approval of<br>Protocol                   | 26-MAY-2015 |

|       |                 |                                                                                                                                                                                                                         |                                             |             |
|-------|-----------------|-------------------------------------------------------------------------------------------------------------------------------------------------------------------------------------------------------------------------|---------------------------------------------|-------------|
| Japan | 3475-061 - 0136 | Institutional Review Board of Osaka University Hospital2-15, Yamadaoka Suita, Osaka 565-0871                                                                                                                            | IRB/IEC Approval of Protocol Amendment # 11 | 27-FEB-2018 |
| Japan | 3475-061 - 0136 | Institutional Review Board of Osaka University Hospital2-15, Yamadaoka Suita, Osaka 565-0871                                                                                                                            | IRB/IEC Approval of Protocol Amendment # 2  | 19-AUG-2015 |
| Japan | 3475-061 - 0136 | Institutional Review Board of Osaka University Hospital2-15, Yamadaoka Suita, Osaka 565-0871                                                                                                                            | IRB/IEC Approval of Protocol Amendment # 5  | 22-MAR-2016 |
| Japan | 3475-061 - 0136 | Institutional Review Board of Osaka University Hospital2-15, Yamadaoka Suita, Osaka 565-0871                                                                                                                            | IRB/IEC Approval of Protocol Amendment # 7  | 20-DEC-2016 |
| Japan | 3475-061 - 0136 | Institutional Review Board of Osaka University Hospital2-15, Yamadaoka Suita, Osaka 565-0871                                                                                                                            | IRB/IEC Approval of Protocol Amendment # 9  | 21-NOV-2017 |
| Japan | 3475-061 - 0137 | Kindai University Hospital Institutional Review Board 377-2, Ohnohigashi Osakasayama, Osaka 589-8511                                                                                                                    | IRB/IEC Approval of Protocol                | 26-MAY-2015 |
| Japan | 3475-061 - 0137 | Kindai University Hospital Institutional Review Board 377-2, Ohnohigashi Osakasayama, Osaka 589-8511                                                                                                                    | IRB/IEC Approval of Protocol Amendment # 11 | 23-JAN-2018 |
| Japan | 3475-061 - 0137 | Kindai University Hospital Institutional Review Board 377-2, Ohnohigashi Osakasayama, Osaka 589-8511                                                                                                                    | IRB/IEC Approval of Protocol Amendment # 13 | 26-MAY-2020 |
| Japan | 3475-061 - 0137 | Kindai University Hospital Institutional Review Board 377-2, Ohnohigashi Osakasayama, Osaka 589-8511                                                                                                                    | IRB/IEC Approval of Protocol Amendment # 2  | 15-SEP-2015 |
| Japan | 3475-061 - 0137 | Kindai University Hospital Institutional Review Board 377-2, Ohnohigashi Osakasayama, Osaka 589-8511                                                                                                                    | IRB/IEC Approval of Protocol Amendment # 5  | 23-FEB-2016 |
| Japan | 3475-061 - 0137 | Kindai University Hospital Institutional Review Board 377-2, Ohnohigashi Osakasayama, Osaka 589-8511                                                                                                                    | IRB/IEC Approval of Protocol Amendment # 7  | 20-DEC-2016 |
| Japan | 3475-061 - 0137 | Kindai University Hospital Institutional Review Board 377-2, Ohnohigashi Osakasayama, Osaka 589-8511                                                                                                                    | IRB/IEC Approval of Protocol Amendment # 9  | 21-NOV-2017 |
| Japan | 3475-061 - 0138 | Osaka International Cancer Institute Institutional Review Board 1-3-3, Nakamichi, Higashinari-ku Osaka, Osaka 537-8511 Japan<br>Osaka International Cancer Institute Institutional Review Board 3-1-69, Otemae, Chuo-ku | B/IEC Approval of Protocol                  | 12-JUN-2015 |
| Japan | 3475-061 - 0138 | Osaka International Cancer Institute Institutional Review                                                                                                                                                               | IRB/IEC Approval of                         | 22-FEB-2018 |

|       |                    |                                                                                                                                                                                                                                                 |                                                      |             |
|-------|--------------------|-------------------------------------------------------------------------------------------------------------------------------------------------------------------------------------------------------------------------------------------------|------------------------------------------------------|-------------|
|       |                    | Board<br>1-3-3, Nakamichi, Higashinari-ku<br>Osaka, Osaka 537-8511<br>Japan<br>Osaka International Cancer<br>Institute Institutional Review<br>Board<br>3-1-69, Otemae, Chuo-ku                                                                 | Protocol<br>Amendment # 11                           |             |
| Japan | 3475-061 -<br>0138 | Osaka International Cancer<br>Institute Institutional Review<br>Board<br>1-3-3, Nakamichi, Higashinari-ku<br>Osaka, Osaka 537-8511<br>Japan<br>Osaka International Cancer<br>Institute Institutional Review<br>Board<br>3-1-69, Otemae, Chuo-ku | IRB/IEC<br>Approval of<br>Protocol<br>Amendment # 2  | 16-JUL-2015 |
| Japan | 3475-061 -<br>0138 | Osaka International Cancer<br>Institute Institutional Review<br>Board<br>1-3-3, Nakamichi, Higashinari-ku<br>Osaka, Osaka 537-8511<br>Japan<br>Osaka International Cancer<br>Institute Institutional Review<br>Board<br>3-1-69, Otemae, Chuo-ku | IRB/IEC<br>Approval of<br>Protocol<br>Amendment # 5  | 17-MAR-2016 |
| Japan | 3475-061 -<br>0138 | Osaka International Cancer<br>Institute Institutional Review<br>Board<br>1-3-3, Nakamichi, Higashinari-ku<br>Osaka, Osaka 537-8511<br>Japan<br>Osaka International Cancer<br>Institute Institutional Review<br>Board<br>3-1-69, Otemae, Chuo-ku | IRB/IEC<br>Approval of<br>Protocol<br>Amendment # 7  | 22-DEC-2016 |
| Japan | 3475-061 -<br>0138 | Osaka International Cancer<br>Institute Institutional Review<br>Board<br>1-3-3, Nakamichi, Higashinari-ku<br>Osaka, Osaka 537-8511<br>Japan<br>Osaka International Cancer<br>Institute Institutional Review<br>Board<br>3-1-69, Otemae, Chuo-ku | IRB/IEC<br>Approval of<br>Protocol<br>Amendment # 9  | 16-NOV-2017 |
| Japan | 3475-061 -<br>0139 | Kanagawa Cancer Center<br>Institutional Review Board<br>2-3-2, Nakao, Asahi-ku<br>Yokohama, Kanagawa 241-8515                                                                                                                                   | IRB/IEC<br>Approval of<br>Protocol                   | 02-JUL-2015 |
| Japan | 3475-061 -<br>0139 | Kanagawa Cancer Center<br>Institutional Review Board<br>2-3-2, Nakao, Asahi-ku<br>Yokohama, Kanagawa 241-8515                                                                                                                                   | IRB/IEC<br>Approval of<br>Protocol<br>Amendment # 11 | 01-FEB-2018 |
| Japan | 3475-061 -<br>0139 | Kanagawa Cancer Center<br>Institutional Review Board<br>2-3-2, Nakao, Asahi-ku<br>Yokohama, Kanagawa 241-8515                                                                                                                                   | IRB/IEC<br>Approval of<br>Protocol<br>Amendment # 2  | 17-SEP-2015 |



|       |                 |                                                                                                                             |                                             |             |
|-------|-----------------|-----------------------------------------------------------------------------------------------------------------------------|---------------------------------------------|-------------|
| Japan | 3475-061 - 0139 | Kanagawa Cancer Center Institutional Review Board<br>2-3-2, Nakao, Asahi-ku<br>Yokohama, Kanagawa 241-8515                  | IRB/IEC Approval of Protocol Amendment # 5  | 10-MAR-2016 |
| Japan | 3475-061 - 0139 | Kanagawa Cancer Center Institutional Review Board<br>2-3-2, Nakao, Asahi-ku<br>Yokohama, Kanagawa 241-8515                  | IRB/IEC Approval of Protocol Amendment # 7  | 22-DEC-2016 |
| Japan | 3475-061 - 0139 | Kanagawa Cancer Center Institutional Review Board<br>2-3-2, Nakao, Asahi-ku<br>Yokohama, Kanagawa 241-8515                  | IRB/IEC Approval of Protocol Amendment # 9  | 16-NOV-2017 |
| Japan | 3475-061 - 0140 | Tokyo Metropolitan Komagome Hospital Institutional Review Board<br>3-18-22, Honkomagome, Bunkyo-ku<br>Tokyo, Tokyo 113-8677 | IRB/IEC Approval of Protocol                | 25-JUN-2015 |
| Japan | 3475-061 - 0140 | Tokyo Metropolitan Komagome Hospital Institutional Review Board<br>3-18-22, Honkomagome, Bunkyo-ku<br>Tokyo, Tokyo 113-8677 | IRB/IEC Approval of Protocol Amendment # 11 | 14-FEB-2018 |
| Japan | 3475-061 - 0140 | Tokyo Metropolitan Komagome Hospital Institutional Review Board<br>3-18-22, Honkomagome, Bunkyo-ku<br>Tokyo, Tokyo 113-8677 | IRB/IEC Approval of Protocol Amendment # 2  | 15-JUL-2015 |
| Japan | 3475-061 - 0140 | Tokyo Metropolitan Komagome Hospital Institutional Review Board<br>3-18-22, Honkomagome, Bunkyo-ku<br>Tokyo, Tokyo 113-8677 | IRB/IEC Approval of Protocol Amendment # 5  | 17-FEB-2016 |
| Japan | 3475-061 - 0140 | Tokyo Metropolitan Komagome Hospital Institutional Review Board<br>3-18-22, Honkomagome, Bunkyo-ku<br>Tokyo, Tokyo 113-8677 | IRB/IEC Approval of Protocol Amendment # 7  | 14-DEC-2016 |
| Japan | 3475-061 - 0140 | Tokyo Metropolitan Komagome Hospital Institutional Review Board<br>3-18-22, Honkomagome, Bunkyo-ku<br>Tokyo, Tokyo 113-8677 | IRB/IEC Approval of Protocol Amendment # 9  | 15-NOV-2017 |
| Japan | 3475-061 - 0141 | National Cancer Ctr IRB #2-J<br>5-1-1, Tsukiji, Chuo-ku<br>Tokyo, Tokyo 104-0045<br>Japan                                   | IRB/IEC Approval of Protocol                | 16-JUN-2015 |
| Japan | 3475-061 - 0141 | National Cancer Ctr IRB #2-J<br>5-1-1, Tsukiji, Chuo-ku<br>Tokyo, Tokyo 104-0045<br>Japan                                   | IRB/IEC Approval of Protocol Amendment # 11 | 21-FEB-2018 |
| Japan | 3475-061 - 0141 | National Cancer Ctr IRB #2-J<br>5-1-1, Tsukiji, Chuo-ku<br>Tokyo, Tokyo 104-0045<br>Japan                                   | IRB/IEC Approval of Protocol Amendment # 2  | 29-JUL-2015 |

|       |                 |                                                                                                                |                                                      |             |
|-------|-----------------|----------------------------------------------------------------------------------------------------------------|------------------------------------------------------|-------------|
| Japan | 3475-061 - 0141 | National Cancer Ctr IRB #2-J<br>5-1-1, Tsukiji, Chuo-ku<br>Tokyo, Tokyo 104-0045<br>Japan                      | IRB/IEC<br>Approval of<br>Protocol<br>Amendment # 5  | 17-FEB-2016 |
| Japan | 3475-061 - 0141 | National Cancer Ctr IRB #2-J<br>5-1-1, Tsukiji, Chuo-ku<br>Tokyo, Tokyo 104-0045<br>Japan                      | IRB/IEC<br>Approval of<br>Protocol<br>Amendment # 7  | 14-DEC-2016 |
| Japan | 3475-061 - 0141 | National Cancer Ctr IRB #2-J<br>5-1-1, Tsukiji, Chuo-ku<br>Tokyo, Tokyo 104-0045<br>Japan                      | IRB/IEC<br>Approval of<br>Protocol<br>Amendment # 9  | 01-NOV-2017 |
| Japan | 3475-061 - 0142 | Osaka Medical and Pharmaceutical<br>University Hospital IRB<br>2-7, Daigaku-machi<br>Takatsuki, Osaka 569-8686 | IRB/IEC<br>Approval of<br>Protocol                   | 26-MAY-2015 |
| Japan | 3475-061 - 0142 | Osaka Medical and Pharmaceutical<br>University Hospital IRB<br>2-7, Daigaku-machi<br>Takatsuki, Osaka 569-8686 | IRB/IEC<br>Approval of<br>Protocol<br>Amendment # 11 | 20-FEB-2018 |
| Japan | 3475-061 - 0142 | Osaka Medical and Pharmaceutical<br>University Hospital IRB<br>2-7, Daigaku-machi<br>Takatsuki, Osaka 569-8686 | IRB/IEC<br>Approval of<br>Protocol<br>Amendment # 2  | 28-JUL-2015 |
| Japan | 3475-061 - 0142 | Osaka Medical and Pharmaceutical<br>University Hospital IRB<br>2-7, Daigaku-machi<br>Takatsuki, Osaka 569-8686 | IRB/IEC<br>Approval of<br>Protocol<br>Amendment # 5  | 16-FEB-2016 |
| Japan | 3475-061 - 0142 | Osaka Medical and Pharmaceutical<br>University Hospital IRB<br>2-7, Daigaku-machi<br>Takatsuki, Osaka 569-8686 | IRB/IEC<br>Approval of<br>Protocol<br>Amendment # 7  | 7-JAN-2017  |
| Japan | 3475-061 - 0142 | Osaka Medical and Pharmaceutical<br>University Hospital IRB<br>2-7, Daigaku-machi<br>Takatsuki, Osaka 569-8686 | IRB/IEC<br>Approval of<br>Protocol<br>Amendment # 9  | 21-NOV-2017 |
| Japan | 3475-061 - 0143 | University of Tsukuba Hospital<br>Institutional Review Board<br>2-1-1, Amakubo<br>Tsukuba, Ibaraki 305-8576    | IRB/IEC<br>Approval of<br>Protocol                   | 25-JUN-2015 |
| Japan | 3475-061 - 0143 | University of Tsukuba Hospital<br>Institutional Review Board<br>2-1-1, Amakubo<br>Tsukuba, Ibaraki 305-8576    | IRB/IEC<br>Approval of<br>Protocol<br>Amendment # 11 | 28-FEB-2018 |
| Japan | 3475-061 - 0143 | University of Tsukuba Hospital<br>Institutional Review Board<br>2-1-1, Amakubo<br>Tsukuba, Ibaraki 305-8576    | IRB/IEC<br>Approval of<br>Protocol<br>Amendment # 2  | 28-SEP-2015 |
| Japan | 3475-061 - 0143 | University of Tsukuba Hospital<br>Institutional Review Board<br>2-1-1, Amakubo<br>Tsukuba, Ibaraki 305-8576    | IRB/IEC<br>Approval of<br>Protocol<br>Amendment # 5  | 12-FEB-2016 |
| Japan | 3475-061 - 0143 | University of Tsukuba Hospital<br>Institutional Review Board<br>2-1-1, Amakubo<br>Tsukuba, Ibaraki 305-8576    | IRB/IEC<br>Approval of<br>Protocol<br>Amendment # 7  | 30-JAN-2017 |
| Japan | 3475-061 - 0143 | University of Tsukuba Hospital<br>Institutional Review Board<br>2-1-1, Amakubo<br>Tsukuba, Ibaraki 305-8576    | IRB/IEC<br>Approval of<br>Protocol<br>Amendment # 9  | 27-NOV-2017 |

|             |                 |                                                                                                                                         |                                                     |             |
|-------------|-----------------|-----------------------------------------------------------------------------------------------------------------------------------------|-----------------------------------------------------|-------------|
| Hong Kong   | 3475-061 - 0144 | HKU/HA HKW Institutional Review Board (HKU/HA HKW IRB)<br>102 Pokfulam Road<br>Room 901. 9/F. Administrative Block. Queen Mary Hospital | IRB/IEC Approval of Protocol                        | 15-APR-2015 |
| Hong Kong   | 3475-061 - 0144 | HKU/HA HKW Institutional Review Board (HKU/HA HKW IRB)<br>102 Pokfulam Road<br>Room 901. 9/F. Administrative Block. Queen Mary Hospital | IRB/IEC Approval of Protocol Amendment # 11         | 18-DEC-2017 |
| Hong Kong   | 3475-061 - 0144 | HKU/HA HKW Institutional Review Board (HKU/HA HKW IRB)<br>102 Pokfulam Road<br>Room 901. 9/F. Administrative Block. Queen Mary Hospital | IRB/IEC Approval of Protocol Amendment # 2          | 17-JUL-2015 |
| Hong Kong   | 3475-061 - 0144 | HKU/HA HKW Institutional Review Board (HKU/HA HKW IRB)<br>102 Pokfulam Road<br>Room 901. 9/F. Administrative Block. Queen Mary Hospital | IRB/IEC Approval of Protocol Amendment # 5          | 19-JAN-2016 |
| Hong Kong   | 3475-061 - 0144 | HKU/HA HKW Institutional Review Board (HKU/HA HKW IRB)<br>102 Pokfulam Road<br>Room 901. 9/F. Administrative Block. Queen Mary Hospital | IRB/IEC Approval of Protocol Amendment # 7          | 07-NOV-2016 |
| Hong Kong   | 3475-061 - 0144 | HKU/HA HKW Institutional Review Board (HKU/HA HKW IRB)<br>102 Pokfulam Road<br>Room 901. 9/F. Administrative Block. Queen Mary Hospital | IRB/IEC Approval of Protocol Amendment # 9          | 31-OCT-2017 |
| New Zealand | 3475-061 - 0160 | Southern Health And Disability Ethics Committee No 1<br>The Terrace, PO Box 5013<br>Wellington, Wellington 6011                         | Central IRB/IEC Approval of Protocol Amendment # 11 | 05-MAR-2018 |
| New Zealand | 3475-061 - 0160 | Southern Health And Disability Ethics Committee No 1<br>The Terrace, PO Box 5013<br>Wellington, Wellington 6011                         | Central IRB/IEC Approval of Protocol Amendment # 2  | 05-OCT-2015 |
| New Zealand | 3475-061 - 160  | Southern Health And Disability Ethics Committee No 1<br>The Terrace, PO Box 5013<br>Wellington, Wellington 6011                         | Central IRB/IEC Approval of Protocol Amendment # 5  | 02-MAY-2016 |
| New Zealand | 3475-061 - 0160 | Southern Health And Disability Ethics Committee No 1<br>The Terrace, PO Box 5013<br>Wellington, Wellington 6011                         | Central IRB/IEC Approval of Protocol Amendment # 7  | 23-SEP-2016 |
| New Zealand | 3475-061 - 0160 | Southern Health And Disability Ethics Committee No 1<br>The Terrace, PO Box 5013                                                        | Central IRB/IEC Approval of Protocol Amendment # 9  | 22-NOV-2017 |

|             |                 |                                                                                                                                     |                                                              |             |
|-------------|-----------------|-------------------------------------------------------------------------------------------------------------------------------------|--------------------------------------------------------------|-------------|
|             |                 | Wellington, Wellington 6011                                                                                                         |                                                              |             |
| New Zealand | 3475-061 - 0160 | Southern Health And Disability Ethics Committee<br>No 1<br>The Terrace, PO Box 5013<br>Wellington, Wellington 6011                  | IRB/IEC<br>Approval of<br>Protocol                           | 04-JUN-2015 |
| New Zealand | 3475-061 - 0160 | Southern Health And Disability Ethics Committee<br>No 1<br>The Terrace, PO Box 5013<br>Wellington, Wellington 6011                  | IRB/IEC<br>Approval of<br>Protocol<br>Amendment # 5          | 02-MAY-2016 |
| New Zealand | 3475-061 - 0160 | Southern Health And Disability Ethics Committee<br>No 1<br>The Terrace, PO Box 5013<br>Wellington, Wellington 6011                  | IRB/IEC<br>Approval of<br>Protocol<br>Amendment # 7          | 23-SEP-2016 |
| New Zealand | 3475-061 - 0161 | Central Health and Disability Ethics Committee<br>20, Aitken Street<br>Ministry of Health PO Box<br>5013Wellington, Wellington 6145 | Central IRB/IEC<br>Approval of<br>Protocol<br>Amendment # 11 | 05-MAR-2018 |
| New Zealand | 3475-061 - 0161 | Central Health and Disability Ethics Committee<br>20, Aitken Street<br>Ministry of Health PO Box<br>5013Wellington, Wellington 6145 | Central IRB/IEC<br>Approval of<br>Protocol<br>Amendment # 2  | 05-OCT-2015 |
| New Zealand | 3475-061 - 0161 | Central Health and Disability Ethics Committee<br>20, Aitken Street<br>Ministry of Health PO Box<br>5013Wellington, Wellington 6145 | Central IRB/IEC<br>Approval of<br>Protocol<br>Amendment # 5  | 02-MAY-2016 |
| New Zealand | 3475-061 - 0161 | Central Health and Disability Ethics Committee<br>20, Aitken Street<br>Ministry of Health PO Box<br>5013Wellington, Wellington 6145 | Central IRB/IEC<br>Approval of<br>Protocol<br>Amendment # 7  | 23-SEP-2016 |
| New Zealand | 3475-061 - 0161 | Central Health and Disability Ethics Committee<br>20, Aitken Street<br>Ministry of Health PO Box<br>5013Wellington, Wellington 6145 | Central IRB/IEC<br>Approval of<br>Protocol<br>Amendment # 9  | 22-NOV-2017 |
| New Zealand | 3475-061 - 0161 | Central Health and Disability Ethics Committee<br>20, Aitken Street<br>Ministry of Health PO Box<br>5013Wellington, Wellington 6145 | IRB/IEC<br>Approval of<br>Protocol                           | 03-JUN-2015 |
| New Zealand | 3475-061 - 0161 | Central Health and Disability Ethics Committee<br>20, Aitken Street<br>Ministry of Health PO Box<br>5013Wellington, Wellington 6145 | IRB/IEC<br>Approval of<br>Protocol<br>Amendment # 2          | 05-OCT-2015 |
| New Zealand | 3475-061 - 0161 | Central Health and Disability Ethics Committee<br>20, Aitken Street<br>Ministry of Health PO Box<br>5013Wellington, Wellington 6145 | IRB/IEC<br>Approval of<br>Protocol<br>Amendment # 5          | 02-MAY-2016 |
| Australia   | 3475-061 - 0176 | Hunter New England Human Research Ethics Committee<br>Locked Bag No. 1<br>New Lambton, New South Wales                              | IRB/IEC<br>Approval of<br>Protocol                           | 08-APR-2015 |

|           |                 |                                                                                                                                                                                                                                              |                                             |             |
|-----------|-----------------|----------------------------------------------------------------------------------------------------------------------------------------------------------------------------------------------------------------------------------------------|---------------------------------------------|-------------|
|           |                 | 2305                                                                                                                                                                                                                                         |                                             |             |
| Australia | 3475-061 - 0176 | Hunter New England Human Research Ethics Committee Locked Bag No. 1 New Lambton, New South Wales 2305                                                                                                                                        | RB/IEC Approval of Protocol Amendment # 11  | 06-MAR-2018 |
| Australia | 3475-061 - 0176 | Hunter New England Human Research Ethics Committee Locked Bag No. 1 New Lambton, New South Wales 2305                                                                                                                                        | IRB/IEC Approval of Protocol Amendment # 13 | 08-MAY-2020 |
| Australia | 3475-061 - 0176 | Hunter New England Human Research Ethics Committee Locked Bag No. 1 New Lambton, New South Wales 2305                                                                                                                                        | IRB/IEC Approval of Protocol Amendment # 2  | 10-AUG-2015 |
| Australia | 3475-061 - 0176 | Hunter New England Human Research Ethics Committee Locked Bag No. 1 New Lambton, New South Wales 2305                                                                                                                                        | IRB/IEC Approval of Protocol Amendment # 5  | 11-MAR-2016 |
| Australia | 3475-061 - 0176 | Hunter New England Human Research Ethics Committee Locked Bag No. 1 New Lambton, New South Wales 2305                                                                                                                                        | IRB/IEC Approval of Protocol Amendment # 7  | 05-OCT-2016 |
| Australia | 3475-061 - 0176 | Hunter New England Human Research Ethics Committee Locked Bag No. 1 New Lambton, New South Wales 2305                                                                                                                                        | IRB/IEC Approval of Protocol Amendment # 9  | 05-DEC-2017 |
| Australia | 3475-061 - 0177 | Hunter New England Human Research Ethics Committee Locked Bag No. 1 New Lambton, New South Wales 2305                                                                                                                                        | IRB/IEC Approval of Protocol                | 08-APR-2015 |
| Australia | 3475-061 - 0177 | Hunter New England Human Research Ethics Committee Locked Bag No. 1 New Lambton, New South Wales 2305                                                                                                                                        | IRB/IEC Approval of Protocol Amendment # 2  | 10-AUG-2015 |
| Australia | 3475-061 - 0177 | Hunter New England Human Research Ethics Committee Locked Bag No. 1 New Lambton, New South Wales 2305                                                                                                                                        | IRB/IEC Approval of Protocol Amendment # 5  | 11-MAR-2016 |
| Australia | 3475-061 - 0178 | Hunter New England Human Research Ethics Committee Locked Bag No. 1 New Lambton, New South Wales 2305<br>Australia<br>Western Sydney Local Health District Human Research Ethics Cnr Hawkesbury and Darcy Rds Research and Education Network | IRB/IEC Approval of Protocol                | 02-APR-2015 |
| Australia | 3475-061 - 0178 | Hunter New England Human Research Ethics Committee Locked Bag No. 1 New Lambton, New South Wales                                                                                                                                             | IRB/IEC Approval of Protocol Amendment # 11 | 16-MAR-2018 |

|           |                    |                                                                                                                                                                                                                                                                   |                                                      |             |
|-----------|--------------------|-------------------------------------------------------------------------------------------------------------------------------------------------------------------------------------------------------------------------------------------------------------------|------------------------------------------------------|-------------|
|           |                    | 2305<br>Australia<br>Western Sydney Local Health<br>District Human Research Ethics<br>Cnr Hawkesbury and Darcy Rds<br>Research and Education Network                                                                                                              |                                                      |             |
| Australia | 3475-061 -<br>0178 | Hunter New England Human<br>Research Ethics Committee<br>Locked Bag No. 1<br>New Lambton, New South Wales<br>2305<br>Australia<br>Western Sydney Local Health<br>District Human Research Ethics<br>Cnr Hawkesbury and Darcy Rds<br>Research and Education Network | IRB/IEC<br>Approval of<br>Protocol<br>Amendment # 2  | 10-AUG-2015 |
| Australia | 3475-061 -<br>0178 | Hunter New England Human<br>Research Ethics Committee<br>Locked Bag No. 1<br>New Lambton, New South Wales<br>2305<br>Australia<br>Western Sydney Local Health<br>District Human Research Ethics<br>Cnr Hawkesbury and Darcy Rds<br>Research and Education Network | IRB/IEC<br>Approval of<br>Protocol<br>Amendment # 5  | 11-MAR-2016 |
| Australia | 3475-061 -<br>0178 | Hunter New England Human<br>Research Ethics Committee<br>Locked Bag No. 1<br>New Lambton, New South Wales<br>2305<br>Australia<br>Western Sydney Local Health<br>District Human Research Ethics<br>Cnr Hawkesbury and Darcy Rds<br>Research and Education Network | IRB/IEC<br>Approval of<br>Protocol<br>Amendment # 7  | 05-OCT-2016 |
| Australia | 3475-061 -<br>0178 | Hunter New England Human<br>Research Ethics Committee<br>Locked Bag No. 1<br>New Lambton, New South Wales<br>2305<br>Australia<br>Western Sydney Local Health<br>District Human Research Ethics<br>Cnr Hawkesbury and Darcy Rds<br>Research and Education Network | IRB/IEC<br>Approval of<br>Protocol<br>Amendment # 9  | 05-DEC-2017 |
| Australia | 3475-061 -<br>0179 | Hunter New England Human<br>Research Ethics Committee<br>Locked Bag No. 1<br>New Lambton, New South Wales<br>2305                                                                                                                                                 | IRB/IEC<br>Approval of<br>Protocol                   | 18-MAR-2015 |
| Australia | 3475-061 -<br>0179 | Hunter New England Human<br>Research Ethics Committee<br>Locked Bag No. 1<br>New Lambton, New South Wales<br>2305                                                                                                                                                 | IRB/IEC<br>Approval of<br>Protocol<br>Amendment # 11 | 20-APR-2018 |
| Australia | 3475-061 -<br>0179 | Hunter New England Human<br>Research Ethics Committee<br>Locked Bag No. 1<br>New Lambton, New South Wales                                                                                                                                                         | IRB/IEC<br>Approval of<br>Protocol<br>Amendment # 2  | 10-AUG-2015 |

|           |                 |                                                                                                       |                                             |             |
|-----------|-----------------|-------------------------------------------------------------------------------------------------------|---------------------------------------------|-------------|
|           |                 | 2305                                                                                                  |                                             |             |
| Australia | 3475-061 - 0179 | Hunter New England Human Research Ethics Committee Locked Bag No. 1 New Lambton, New South Wales 2305 | IRB/IEC Approval of Protocol Amendment # 5  | 11-MAR-2016 |
| Australia | 3475-061 - 0179 | Hunter New England Human Research Ethics Committee Locked Bag No. 1 New Lambton, New South Wales 2305 | IRB/IEC Approval of Protocol Amendment # 7  | 05-OCT-2016 |
| Australia | 3475-061 - 0179 | Hunter New England Human Research Ethics Committee Locked Bag No. 1 New Lambton, New South Wales 2305 | IRB/IEC Approval of Protocol Amendment # 9  | 19-DEC-2017 |
| Australia | 3475-061 - 0180 | Hunter New England Human Research Ethics Committee Locked Bag No. 1 New Lambton, New South Wales 2305 | IRB/IEC Approval of Protocol                | 08-APR-2015 |
| Australia | 3475-061 - 0180 | Hunter New England Human Research Ethics Committee Locked Bag No. 1 New Lambton, New South Wales 2305 | IRB/IEC Approval of Protocol Amendment # 11 | 06-MAR-2018 |
| Australia | 3475-061 - 0180 | Hunter New England Human Research Ethics Committee Locked Bag No. 1 New Lambton, New South Wales 2305 | IRB/IEC Approval of Protocol Amendment # 2  | 10-AUG-2015 |
| Australia | 3475-061 - 0180 | Hunter New England Human Research Ethics Committee Locked Bag No. 1 New Lambton, New South Wales 2305 | IRB/IEC Approval of Protocol Amendment # 5  | 11-MAR-2016 |
| Australia | 3475-061 - 0180 | Hunter New England Human Research Ethics Committee Locked Bag No. 1 New Lambton, New South Wales 2305 | IRB/IEC Approval of Protocol Amendment # 7  | 05-OCT-2016 |
| Australia | 3475-061 - 0180 | Hunter New England Human Research Ethics Committee Locked Bag No. 1 New Lambton, New South Wales 2305 | IRB/IEC Approval of Protocol Amendment # 9  | 16-JAN-2018 |
| Australia | 3475-061 - 0181 | Hunter New England Human Research Ethics Committee Locked Bag No. 1 New Lambton, New South Wales 2305 | IRB/IEC Approval of Protocol                | 18-MAR-2015 |
| Australia | 3475-061 - 0181 | Hunter New England Human Research Ethics Committee Locked Bag No. 1 New Lambton, New South Wales 2305 | IRB/IEC Approval of Protocol Amendment # 11 | 16-MAR-2018 |
| Australia | 3475-061 - 0181 | Hunter New England Human Research Ethics Committee Locked Bag No. 1 New Lambton, New South Wales      | IRB/IEC Approval of Protocol Amendment # 2  | 10-AUG-2015 |



|             |                 |                                                                                                                        |                                                   |             |
|-------------|-----------------|------------------------------------------------------------------------------------------------------------------------|---------------------------------------------------|-------------|
|             |                 | 2305                                                                                                                   |                                                   |             |
| Australia   | 3475-061 - 0181 | Hunter New England Human Research Ethics Committee<br>Locked Bag No. 1<br>New Lambton, New South Wales 2305            | IRB/IEC<br>Approval of Protocol<br>Amendment # 5  | 11-MAR-2016 |
| Australia   | 3475-061 - 0181 | Hunter New England Human Research Ethics Committee<br>Locked Bag No. 1<br>New Lambton, New South Wales 2305            | IRB/IEC<br>Approval of Protocol<br>Amendment # 7  | 05-OCT-2016 |
| Australia   | 3475-061 - 0181 | Hunter New England Human Research Ethics Committee<br>Locked Bag No. 1<br>New Lambton, New South Wales 2305            | IRB/IEC<br>Approval of Protocol<br>Amendment # 9  | 05-DEC-2017 |
| Australia   | 3475-061 - 0182 | Bellberry Limited<br>129 Glen Osmond Rd<br>Bellberry Human Research Ethics Committee<br>Eastwood, South Australia 5063 | IRB/IEC<br>Approval of Protocol                   | 25-MAR-2015 |
| Australia   | 3475-061 - 0182 | Bellberry Limited<br>129 Glen Osmond Rd<br>Bellberry Human Research Ethics Committee<br>Eastwood, South Australia 5063 | IRB/IEC<br>Approval of Protocol<br>Amendment # 11 | 12-FEB-2018 |
| Australia   | 3475-061 - 0182 | Bellberry Limited<br>129 Glen Osmond Rd<br>Bellberry Human Research Ethics Committee<br>Eastwood, South Australia 5063 | IRB/IEC<br>Approval of Protocol<br>Amendment # 2  | 07-SEP-2015 |
| Australia   | 3475-061 - 0182 | Bellberry Limited<br>129 Glen Osmond Rd<br>Bellberry Human Research Ethics Committee<br>Eastwood, South Australia 5063 | IRB/IEC<br>Approval of Protocol<br>Amendment # 5  | 22-FEB-2016 |
| Australia   | 3475-061 - 0182 | Bellberry Limited<br>129 Glen Osmond Rd<br>Bellberry Human Research Ethics Committee<br>Eastwood, South Australia 5063 | IRB/IEC<br>Approval of Protocol<br>Amendment # 7  | 17-OCT-2016 |
| Australia   | 3475-061 - 0182 | Bellberry Limited<br>129 Glen Osmond Rd<br>Bellberry Human Research Ethics Committee<br>Eastwood, South Australia 5063 | IRB/IEC<br>Approval of Protocol<br>Amendment # 9  | 30-OCT-2017 |
| Puerto Rico | 3475-061 - 0192 | San Juan City Hospital IRB<br>Oficina de Educacion Medica 2do Piso<br>Centro Medico<br>San Juan, PR 00935<br>USA       | IRB/IEC<br>Approval of Protocol                   | 04-MAY-2015 |
| Puerto Rico | 3475-061 - 0192 | San Juan City Hospital IRB<br>Oficina de Educacion Medica 2do Piso<br>Centro Medico<br>San Juan, PR 00935<br>USA       | IRB/IEC<br>Approval of Protocol<br>Amendment # 2  | 25-JUN-2015 |
| Puerto Rico | 3475-061 - 0192 | San Juan City Hospital IRB<br>Oficina de Educacion Medica 2do                                                          | IRB/IEC<br>Approval of                            | 21-JAN-2016 |

|        |                    |                                                                                                                                                                                         |                                                     |             |
|--------|--------------------|-----------------------------------------------------------------------------------------------------------------------------------------------------------------------------------------|-----------------------------------------------------|-------------|
|        |                    | Piso<br>Centro Medico<br>San Juan, PR 00935<br>USA                                                                                                                                      | Protocol<br>Amendment # 5                           |             |
| Mexico | 3475-061 -<br>0208 | Comite de Etica en Investigacion<br>de Oaxaca Site Management<br>Organization S.C.<br>Humboldt 302<br>Centro Oaxaca<br>Oaxaca, Oaxaca 68000                                             | IRB/IEC<br>Approval of<br>Protocol                  | 27-MAY-2015 |
| Mexico | 3475-061 -<br>0208 | Comite de Etica en Investigacion<br>de Oaxaca Site Management<br>Organization S.C.<br>Humboldt 302<br>Centro Oaxaca<br>Oaxaca, Oaxaca 68000                                             | IRB/IEC<br>Approval of<br>Protocol<br>Amendment # 2 | 27-JUL-2015 |
| Mexico | 3475-061 -<br>0208 | Comite de Etica en Investigacion<br>de Oaxaca Site Management<br>Organization S.C.<br>Humboldt 302<br>Centro Oaxaca<br>Oaxaca, Oaxaca 68000                                             | IRB/IEC<br>Approval of<br>Protocol<br>Amendment # 5 | 01-MAR-2016 |
| Mexico | 3475-061 -<br>0210 | Comite de Etica en Investigacion<br>del Centro Estatal de Cancerologia<br>Servicio<br>de Salud del Edo de Chi<br>Ejercito Nacional Num 3700 Col<br>Centro<br>Chihuahua, Chihuahua 31000 | IRB/IEC<br>Approval of<br>Protocol                  | 13-MAR-2015 |
| Mexico | 3475-061 -<br>0210 | Comite de Etica en Investigacion<br>del Centro Estatal de Cancerologia<br>Servicio<br>de Salud del Edo de Chi<br>Ejercito Nacional Num 3700 Col<br>Centro<br>Chihuahua, Chihuahua 31000 | IRB/IEC<br>Approval of<br>Protocol<br>Amendment # 2 | 27-AUG-2015 |
| Mexico | 3475-061 -<br>0210 | Comite de Etica en Investigacion<br>del Centro Estatal de Cancerologia<br>Servicio<br>de Salud del Edo de Chi<br>Ejercito Nacional Num 3700 Col<br>Centro<br>Chihuahua, Chihuahua 31000 | IRB/IEC<br>Approval of<br>Protocol<br>Amendment # 5 | 11-MAR-2016 |
| Mexico | 3475-061 -<br>0210 | Comite de Etica en Investigacion<br>del Centro Estatal de Cancerologia<br>Servicio<br>de Salud del Edo de Chi<br>Ejercito Nacional Num 3700 Col<br>Centro<br>Chihuahua, Chihuahua 31000 | IRB/IEC<br>Approval of<br>Protocol<br>Amendment # 7 | 27-JAN-2017 |
| Mexico | 3475-061 -<br>0212 | Mexico Centre for Clinical<br>Research<br>Amores 709. Col del Valle<br>Del. Benito Juarez<br>Mexico City, Mexico 03100<br>Mexico                                                        | IRB/IEC<br>Approval of<br>Protocol                  | 20-APR-2015 |
| Mexico | 3475-061 -<br>0212 | Mexico Centre for Clinical<br>Research<br>Amores 709. Col del Valle<br>Del. Benito Juarez                                                                                               | IRB/IEC<br>Approval of<br>Protocol<br>Amendment # 2 | 12-AUG-2015 |

|           |                    |                                                                                                                                    |                                                     |             |
|-----------|--------------------|------------------------------------------------------------------------------------------------------------------------------------|-----------------------------------------------------|-------------|
|           |                    | Mexico City, Mexico 03100<br>Mexico                                                                                                |                                                     |             |
| Mexico    | 3475-061 -<br>0212 | Mexico Centre for Clinical<br>Research<br>Amores 709. Col del Valle<br>Del. Benito Juarez<br>Mexico City, Mexico 03100<br>Mexico   | IRB/IEC<br>Approval of<br>Protocol<br>Amendment # 5 | 18-MAR-2016 |
| Mexico    | 3475-061 -<br>0212 | Mexico Centre for Clinical<br>Research<br>Amores 709. Col del Valle<br>Del. Benito Juarez<br>Mexico City, Mexico 03100<br>Mexico   | IRB/IEC<br>Approval of<br>Protocol<br>Amendment # 7 | 17-JAN-2017 |
| Guatemala | 3475-061 -<br>0224 | Zugueme<br>3ra. Calle 11-36<br>Zona 15 Colonia Tecun Uman<br>Guatemala, Guatemala 01015<br>Guatemala                               | IRB/IEC<br>Approval of<br>Protocol                  | 11-MAR-2015 |
| Guatemala | 3475-061 -<br>0224 | Zugueme<br>3ra. Calle 11-36<br>Zona 15 Colonia Tecun Uman<br>Guatemala, Guatemala 01015<br>Guatemala                               | IRB/IEC<br>Approval of<br>Protocol<br>Amendment # 2 | 24-JUN-2015 |
| Guatemala | 3475-061 -<br>0224 | Zugueme<br>3ra. Calle 11-36<br>Zona 15 Colonia Tecun Uman<br>Guatemala, Guatemala 01015<br>Guatemala                               | IRB/IEC<br>Approval of<br>Protocol<br>Amendment # 5 | 21-JAN-2016 |
| Guatemala | 3475-061 -<br>0224 | Zugueme<br>3ra. Calle 11-36<br>Zona 15 Colonia Tecun Uman<br>Guatemala, Guatemala 01015<br>Guatemala                               | IRB/IEC<br>Approval of<br>Protocol<br>Amendment # 7 | 16-NOV-2016 |
| Guatemala | 3475-061 -<br>0225 | Comite de Etica Independiente<br>Zugeme<br>3 Calle 11-36<br>Zona 15. Colonia Tecun Uman<br>Guatemala, Guatemala 01015<br>Guatemala | IRB/IEC<br>Approval of<br>Protocol                  | 16-MAR-2015 |
| Guatemala | 3475-061 -<br>0225 | Comite de Etica Independiente<br>Zugeme<br>3 Calle 11-36<br>Zona 15. Colonia Tecun Uman<br>Guatemala, Guatemala 01015<br>Guatemala | IRB/IEC<br>Approval of<br>Protocol<br>Amendment # 2 | 24-JUN-2015 |
| Guatemala | 3475-061 -<br>0225 | Comite de Etica Independiente<br>Zugeme<br>3 Calle 11-36<br>Zona 15. Colonia Tecun Uman<br>Guatemala, Guatemala 01015<br>Guatemala | IRB/IEC<br>Approval of<br>Protocol<br>Amendment # 5 | 11-FEB-2016 |
| Guatemala | 3475-061 -<br>0225 | Comite de Etica Independiente<br>Zugeme<br>3 Calle 11-36<br>Zona 15. Colonia Tecun Uman<br>Guatemala, Guatemala 01015<br>Guatemala | IRB/IEC<br>Approval of<br>Protocol<br>Amendment # 7 | 16-NOV-2016 |
| Guatemala | 3475-061 -<br>0227 | Zugueme<br>3ra. Calle 11-36                                                                                                        | IRB/IEC<br>Approval of                              | 16-MAR-2015 |

|           |                    |                                                                                                                                     |                                                             |             |
|-----------|--------------------|-------------------------------------------------------------------------------------------------------------------------------------|-------------------------------------------------------------|-------------|
|           |                    | Zona 15 Colonia Tecun Uman<br>Guatemala, Guatemala 01015<br>Guatemala                                                               | Protocol                                                    |             |
| Guatemala | 3475-061 -<br>0227 | Zugueme<br>3ra. Calle 11-36<br>Zona 15 Colonia Tecun Uman<br>Guatemala, Guatemala 01015<br>Guatemala                                | IRB/IEC<br>Approval of<br>Protocol<br>Amendment # 2         | 24-JUN-2015 |
| Guatemala | 3475-061 -<br>0227 | Zugueme<br>3ra. Calle 11-36<br>Zona 15 Colonia Tecun Uman<br>Guatemala, Guatemala 01015<br>Guatemala                                | IRB/IEC<br>Approval of<br>Protocol<br>Amendment # 5         | 21-JAN-2016 |
| Guatemala | 3475-061 -<br>0227 | Zugueme<br>3ra. Calle 11-36<br>Zona 15 Colonia Tecun Uman<br>Guatemala, Guatemala 01015<br>Guatemala                                | IRB/IEC<br>Approval of<br>Protocol<br>Amendment # 7         | 16-NOV-2016 |
| Guatemala | 3475-061 -<br>0228 | Zugueme<br>3ra. Calle 11-36<br>Zona 15 Colonia Tecun Uman<br>Guatemala, Guatemala 01015<br>Guatemala                                | IRB/IEC<br>Approval of<br>Protocol                          | 06-JAN-2016 |
| Guatemala | 3475-061 -<br>0228 | Zugueme<br>3ra. Calle 11-36<br>Zona 15 Colonia Tecun Uman<br>Guatemala, Guatemala 01015<br>Guatemala                                | IRB/IEC<br>Approval of<br>Protocol<br>Amendment # 2         | 06-JAN-2016 |
| Guatemala | 3475-061 -<br>0228 | Zugueme<br>3ra. Calle 11-36<br>Zona 15 Colonia Tecun Uman<br>Guatemala, Guatemala 01015<br>Guatemala                                | IRB/IEC<br>Approval of<br>Protocol<br>Amendment # 5         | 21-JAN-2016 |
| Guatemala | 3475-061 -<br>0228 | Zugueme<br>3ra. Calle 11-36<br>Zona 15 Colonia Tecun Uman<br>Guatemala, Guatemala 01015<br>Guatemala                                | IRB/IEC<br>Approval of<br>Protocol<br>Amendment # 7         | 16-NOV-2016 |
| Colombia  | 3475-061 -<br>0242 | Comite de Etica E Investigacion<br>Biomedica de la Fundacion Valle<br>del Lili<br>Carrera 98# 18-49<br>Cali, Valle del Cauca 760026 | Central IRB/IEC<br>Approval of<br>Protocol<br>Amendment # 2 | 16-SEP-2015 |
| Colombia  | 3475-061 -<br>0242 | Comite de Etica E Investigacion<br>Biomedica de la Fundacion Valle<br>del Lili<br>Carrera 98# 18-49<br>Cali, Valle del Cauca 760026 | Central IRB/IEC<br>Approval of<br>Protocol<br>Amendment # 5 | 09-MAR-2016 |
| Colombia  | 3475-061 -<br>0242 | Comite de Etica E Investigacion<br>Biomedica de la Fundacion Valle<br>del Lili<br>Carrera 98# 18-49<br>Cali, Valle del Cauca 760026 | IRB/IEC<br>Approval of<br>Protocol                          | 16-MAR-2015 |
| Colombia  | 3475-061 -<br>0242 | Comite de Etica E Investigacion<br>Biomedica de la Fundacion Valle<br>del Lili<br>Carrera 98# 18-49<br>Cali, Valle del Cauca 760026 | IRB/IEC<br>Approval of<br>Protocol<br>Amendment # 11        | 16-FEB-2018 |
| Colombia  | 3475-061 -<br>0242 | Comite de Etica E Investigacion<br>Biomedica de la Fundacion Valle                                                                  | IRB/IEC<br>Approval of                                      | 07-SEP-2015 |

|          |                    |                                                                                                                                                                                           |                                                             |             |
|----------|--------------------|-------------------------------------------------------------------------------------------------------------------------------------------------------------------------------------------|-------------------------------------------------------------|-------------|
|          |                    | del Lili<br>Carrera 98# 18-49<br>Cali, Valle del Cauca 760026                                                                                                                             | Protocol<br>Amendment # 2                                   |             |
| Colombia | 3475-061 -<br>0242 | Comite de Etica E Investigacion<br>Biomedica de la Fundacion Valle<br>del Lili<br>Carrera 98# 18-49<br>Cali, Valle del Cauca 760026                                                       | IRB/IEC<br>Approval of<br>Protocol<br>Amendment # 5         | 22-FEB-2016 |
| Colombia | 3475-061 -<br>0242 | Comite de Etica E Investigacion<br>Biomedica de la Fundacion Valle<br>del Lili<br>Carrera 98# 18-49<br>Cali, Valle del Cauca 760026                                                       | IRB/IEC<br>Approval of<br>Protocol<br>Amendment # 7         | 07-DEC-2016 |
| Colombia | 3475-061 -<br>0242 | Comite de Etica E Investigacion<br>Biomedica de la Fundacion Valle<br>del Lili<br>Carrera 98# 18-49<br>Cali, Valle del Cauca 760026                                                       | IRB/IEC<br>Approval of<br>Protocol<br>Amendment # 9         | 15-NOV-2017 |
| Colombia | 3475-061 -<br>0243 | Comite Etico Independiente<br>Instituto<br>De Cancerologia S.A<br>Carrera 70 # 1 - 135 Torre 5 Piso 3<br>Comite de Etica Independiente<br>Medellin, Antioquia 050024                      | Central IRB/IEC<br>Approval of<br>Protocol<br>Amendment # 2 | 16-SEP-2015 |
| Colombia | 3475-061 -<br>0243 | Comite Etico Independiente<br>Instituto<br>De Cancerologia S.A<br>Carrera 70 # 1 - 135 Torre 5 Piso 3<br>Comite de Etica Independiente<br>Medellin, Antioquia 050024                      | Central IRB/IEC<br>Approval of<br>Protocol<br>Amendment # 5 | 09-MAR-2016 |
| Colombia | 3475-061 - 0243    | Comite Etico Independiente<br>Instituto<br>De Cancerologia S.A<br>Carrera 70 # 1 - 135 Torre 5 Piso 3<br>Comite de Etica Independiente<br>Medellin, Antioquia 050024                      | IRB/IEC<br>Approval of<br>Protocol                          | 08-OCT-2015 |
| Colombia | 3475-061-          |                                                                                                                                                                                           | Central IRB/IEC<br>Approval                                 | 16-SEP-2015 |
| Colombia | 3475-061-          |                                                                                                                                                                                           | Central IRB/IEC<br>Approval                                 | 09-MAR-2016 |
| Colombia | 3475-061-          |                                                                                                                                                                                           | IRB/IEC<br>Approval of                                      | 17-JUN-2015 |
| Colombia | 3475-061-          |                                                                                                                                                                                           | IRB/IEC<br>Approval of                                      | 14-FEB-2018 |
| Colombia | 3475-061-          |                                                                                                                                                                                           | IRB/IEC<br>Approval of                                      | 16-SEP-2015 |
| Colombia | 3475-061-          |                                                                                                                                                                                           | IRB/IEC<br>Approval of                                      | 09-MAR-2016 |
| Colombia | 3475-061-          |                                                                                                                                                                                           | IRB/IEC<br>Approval of                                      | 30-NOV-2016 |
| Colombia | 3475-061-          |                                                                                                                                                                                           | IRB/IEC<br>Approval of                                      | 15-NOV-2017 |
| Chile    | 3475-061 -<br>0256 | Comite de Etica de Investigacion<br>San José # 1053, Independencia<br>Santiago, Region M. de Santiago<br>8380755<br>Chile<br>Comité de Etica de la<br>Investigacion del Servicio de Salud | IRB/IEC<br>Approval of<br>Protocol                          | 26-MAY-2015 |

|       |                    |                                                                                                                                                                                                                                                                         |                                                      |             |
|-------|--------------------|-------------------------------------------------------------------------------------------------------------------------------------------------------------------------------------------------------------------------------------------------------------------------|------------------------------------------------------|-------------|
|       |                    | Metropolitano Norte<br>San jose 1053<br>Santiago, Region M. de Santiago                                                                                                                                                                                                 |                                                      |             |
| Chile | 3475-061 -<br>0256 | Comite de Etica de Investigacion<br>San José # 1053, Independencia<br>Santiago, Region M. de Santiago<br>8380755<br>Chile<br>Comité de Etica de la<br>Investigacion del Servicio de Salud<br>Metropolitano Norte<br>San jose 1053<br>Santiago, Region M. de Santiago    | IRB/IEC<br>Approval of<br>Protocol<br>Amendment # 11 | 07-JUN-2018 |
| Chile | 3475-061 -<br>0256 | Comite de Etica de<br>Investigacion San José #<br>1053, Independencia<br>Santiago, Region M. de<br>Santiago 8380755<br>Chile<br>Comité de Etica de la<br>Investigacion del Servicio de<br>Salud Metropolitano Norte San<br>jose 1053<br>Santiago, Region M. de Santiago | IRB/IEC<br>Approval of<br>Protocol<br>Amendment # 13 | 14-OCT-2020 |
| Chile | 3475-061 -<br>0256 | Comite de Etica de<br>Investigacion San José #<br>1053, Independencia<br>Santiago, Region M. de<br>Santiago 8380755<br>Chile<br>Comité de Etica de la<br>Investigacion del Servicio de<br>Salud Metropolitano Norte San<br>jose 1053<br>Santiago, Region M. de Santiago | IRB/IEC<br>Approval of<br>Protocol<br>Amendment # 2  | 05-AUG-2015 |
| Chile | 3475-061 -<br>0256 | Comite de Etica de<br>Investigacion San José #<br>1053, Independencia<br>Santiago, Region M. de<br>Santiago 8380755<br>Chile<br>Comité de Etica de la<br>Investigacion del Servicio de<br>Salud Metropolitano Norte San<br>jose 1053<br>Santiago, Region M. de Santiago | IRB/IEC<br>Approval of<br>Protocol<br>Amendment # 5  | 10-FEB-2016 |
| Chile | 3475-061 -<br>0256 | Comite de Etica de<br>Investigacion San José #<br>1053, Independencia<br>Santiago, Region M. de<br>Santiago 8380755<br>Chile<br>Comité de Etica de la<br>Investigacion del Servicio de<br>Salud Metropolitano Norte San<br>jose 1053<br>Santiago, Region M. de Santiago | IRB/IEC<br>Approval of<br>Protocol<br>Amendment # 7  | 09-FEB-2017 |
| Chile | 3475-061 -<br>0256 | Comite de Etica de<br>Investigacion San José #<br>1053, Independencia                                                                                                                                                                                                   | IRB/IEC<br>Approval of<br>Protocol                   |             |

|       |                 |                                                                                                                                                                                    |                                             |             |
|-------|-----------------|------------------------------------------------------------------------------------------------------------------------------------------------------------------------------------|---------------------------------------------|-------------|
|       |                 | Santiago, Region M. de Santiago 8380755<br>Chile<br>Comité de Etica de la Investigacion del Servicio de Salud Metropolitano Norte San jose 1053<br>Santiago, Region M. de Santiago | Amendment # 9                               |             |
| Chile | 3475-061 - 0259 | Comite de Etica Cientifico, Servicio de Salud Metropolitano Oriente<br>Avda. Salvador 364<br>Providencia<br>Santiago, Region M. de Santiago                                        | IRB/IEC Approval of Protocol                | 26-MAY-2015 |
| Chile | 3475-061 - 0259 | Comite de Etica Cientifico, Servicio de Salud Metropolitano Oriente<br>Avda. Salvador 364<br>Providencia<br>Santiago, Region M. de Santiago                                        | IRB/IEC Approval of Protocol Amendment # 11 | 02-JAN-2018 |
| Chile | 3475-061 - 0259 | Comite de Etica Cientifico, Servicio de Salud Metropolitano Oriente<br>Avda. Salvador 364<br>Providencia<br>Santiago, Region M. de Santiago                                        | IRB/IEC Approval of Protocol Amendment # 13 | 15-SEP-2020 |
| Chile | 3475-061 - 0259 | Comite de Etica Cientifico, Servicio de Salud Metropolitano Oriente<br>Avda. Salvador 364<br>Providencia<br>Santiago, Region M. de Santiago                                        | IRB/IEC Approval of Protocol Amendment # 2  | 07-JUL-2015 |
| Chile | 3475-061 - 0259 | Comite de Etica Cientifico, Servicio de Salud Metropolitano Oriente<br>Avda. Salvador 364<br>Providencia<br>Santiago, Region M. de Santiago                                        | IRB/IEC Approval of Protocol Amendment # 5  | 08-MAR-2016 |
| Chile | 3475-061 - 0259 | Comite de Etica Cientifico, Servicio de Salud Metropolitano Oriente<br>Avda. Salvador 364<br>Providencia<br>Santiago, Region M. de Santiago                                        | IRB/IEC Approval of Protocol Amendment # 7  | 23-MAY-2017 |
| Chile | 3475-061 - 0259 | Comite de Etica Cientifico, Servicio de Salud Metropolitano Oriente<br>Avda. Salvador 364<br>Providencia<br>Santiago, Region M. de Santiago                                        | IRB/IEC Approval of Protocol Amendment # 9  | 14-NOV-2017 |
| Chile | 3475-061 - 0261 | Comite Etico Cientifico Servicio de Salud Araucania Sur<br>Andres Bello 636<br>Temuco, Araucania 4791301                                                                           | IRB/IEC Approval of Protocol                | 25-MAY-2015 |
| Chile | 3475-061 - 0261 | Comite Etico Cientifico Servicio de Salud Araucania Sur<br>Andres Bello 636<br>Temuco, Araucania 4791301                                                                           | IRB/IEC Approval of Protocol Amendment # 11 | 22-AUG-2018 |
| Chile | 3475-061 - 0261 | Comite Etico Cientifico Servicio de Salud Araucania Sur                                                                                                                            | IRB/IEC Approval of                         | 20-JUL-2021 |



|           |                    |                                                                                                                                                    |                                                     |             |
|-----------|--------------------|----------------------------------------------------------------------------------------------------------------------------------------------------|-----------------------------------------------------|-------------|
|           |                    | Andres Bello 636<br>Temuco, Araucania 4791301                                                                                                      | Protocol<br>Amendment # 13                          |             |
| Chile     | 3475-061 -<br>0261 | Comite Etico Cientifico Servicio<br>de Salud Araucania Sur<br>Andres Bello 636<br>Temuco, Araucania 4791301                                        | IRB/IEC<br>Approval of<br>Protocol<br>Amendment # 2 | 14-AUG-2015 |
| Chile     | 3475-061 -<br>0261 | Comite Etico Cientifico Servicio<br>de Salud Araucania Sur<br>Andres Bello 636<br>Temuco, Araucania 4791301                                        | IRB/IEC<br>Approval of<br>Protocol<br>Amendment # 5 | 27-APR-2016 |
| Chile     | 3475-061 -<br>0261 | Comite Etico Cientifico Servicio<br>de Salud Araucania Sur<br>Andres Bello 636<br>Temuco, Araucania 4791301                                        | IRB/IEC<br>Approval of<br>Protocol<br>Amendment # 7 | 10-JAN-2018 |
| Chile     | 3475-061 -<br>0261 | Comite Etico Cientifico Servicio<br>de Salud Araucania Sur<br>Andres Bello 636<br>Temuco, Araucania 4791301                                        | IRB/IEC<br>Approval of<br>Protocol<br>Amendment # 9 | 20-DEC-2017 |
| Chile     | 3475-061 -<br>0262 | Comite Etica Cientifico Servicio<br>de Salud Metropolitano Oriente<br>Av. Salvador 364<br>Santiago, Region M. de Santiago                          | IRB/IEC Approval<br>of Protocol                     | 04-AUG-2015 |
| Chile     | 3475-061 -<br>0262 | Comite Etica Cientifico Servicio<br>de Salud Metropolitano Oriente<br>Av. Salvador 364<br>Santiago, Region M. de Santiago                          | IRB/IEC<br>Approval of<br>Protocol<br>Amendment # 2 | 04-AUG-2015 |
| Chile     | 3475-061 -<br>0262 | Comite Etica Cientifico Servicio<br>de Salud Metropolitano Oriente<br>Av. Salvador 364<br>Santiago, Region M. de Santiago                          | IRB/IEC<br>Approval of<br>Protocol<br>Amendment # 5 | 29-MAR-2016 |
| Argentina | 3475-061 -<br>0288 | Comite Independiente de Etica<br>para Ensayos en Farmacologia<br>Clinica Pte J. E. Uriburu 774<br>Piso 1<br>Buenos Aires, Buenos Aires<br>C1027AAP | IRB/IEC Approval<br>of Protocol                     | 10-APR-2015 |
| Argentina | 3475-061 -<br>0288 | Comite Independiente de Etica<br>para Ensayos en Farmacologia<br>Clinica Pte J. E. Uriburu 774<br>Piso 1<br>Buenos Aires, Buenos Aires<br>C1027AAP | IRB/IEC<br>Approval of<br>Protocol<br>Amendment # 2 | 24-JUL-2015 |
| Argentina | 3475-061 -<br>0288 | Comite Independiente de Etica<br>para Ensayos en Farmacologia<br>Clinica Pte J. E. Uriburu 774<br>Piso 1<br>Buenos Aires, Buenos Aires<br>1027AAP  | IRB/IEC<br>Approval of<br>Protocol<br>Amendment # 5 | 23-MAR-2016 |
| Argentina | 3475-061 -         |                                                                                                                                                    | IRB/IEC<br>Approval of                              | 15-JUN-2015 |
| Argentina | 3475-061 -         |                                                                                                                                                    | IRB/IEC<br>Approval of                              | 25-AUG-2015 |
| Argentina | 3475-061 -         |                                                                                                                                                    | IRB/IEC<br>Approval of                              | 09-AUG-2016 |
| Argentina | 3475-061 -         |                                                                                                                                                    | IRB/IEC<br>Approval of                              | 20-DEC-2016 |
| Argentina | 3475-061 -         |                                                                                                                                                    | IRB/IEC<br>Approval of                              | 30-APR-2015 |
| Argentina | 3475-061 -         |                                                                                                                                                    | IRB/IEC                                             | 16-FEB-2016 |

|           |                 |                                                                                                                                                                                                                                                                                      |                                                              |             |
|-----------|-----------------|--------------------------------------------------------------------------------------------------------------------------------------------------------------------------------------------------------------------------------------------------------------------------------------|--------------------------------------------------------------|-------------|
|           |                 |                                                                                                                                                                                                                                                                                      | Approval of                                                  |             |
| Argentina | 3475-061 -      |                                                                                                                                                                                                                                                                                      | IRB/IEC Approval of                                          | 19-APR-2016 |
| Argentina | 3475-061 -      |                                                                                                                                                                                                                                                                                      | IRB/IEC Approval of                                          | 29-NOV-2016 |
| Turkey    | 3475-061 - 0304 | Hacettepe University<br>Faculty of Medicine Ethics<br>Committee Hacettepe<br>Universitesi Etik Kurul ve<br>Komisyonlari<br>Ankara, Ankara 06100<br>Turkey<br>Hacettepe University<br>Faculty of Medicine Ethics<br>Committee Hacettepe<br>Universitesi Etik Kurul<br>ve Komisyonlari | Central IRB/IEC<br>Approval of<br>Protocol                   | 21-MAY-2015 |
| Turkey    | 3475-061 - 0304 | Hacettepe University<br>Faculty of Medicine Ethics<br>Committee Hacettepe<br>Universitesi Etik Kurul ve<br>Komisyonlari<br>Ankara, Ankara 06100<br>Turkey<br>Hacettepe University<br>Faculty of Medicine Ethics<br>Committee Hacettepe<br>Universitesi Etik Kurul<br>ve Komisyonlari | Central IRB/IEC<br>Approval of<br>Protocol<br>Amendment # 11 | 03-APR-2018 |
| Turkey    | 3475-061 - 0304 | Hacettepe University<br>Faculty of Medicine Ethics<br>Committee Hacettepe<br>Universitesi Etik Kurul ve<br>Komisyonlari<br>Ankara, Ankara 06100<br>Turkey<br>Hacettepe University<br>Faculty of Medicine Ethics<br>Committee Hacettepe<br>Universitesi Etik Kurul<br>ve Komisyonlari | Central IRB/IEC<br>Approval of<br>Protocol<br>Amendment # 2  | 23-JUL-2015 |
| Turkey    | 3475-061 - 0304 | Hacettepe University<br>Faculty of Medicine Ethics<br>Committee Hacettepe<br>Universitesi Etik Kurul ve<br>Komisyonlari<br>Ankara, Ankara 06100<br>Turkey<br>Hacettepe University<br>Faculty of Medicine Ethics<br>Committee Hacettepe<br>Universitesi Etik Kurul<br>ve Komisyonlari | Central IRB/IEC<br>Approval of<br>Protocol<br>Amendment # 5  | 31-MAR-2016 |
| Turkey    | 3475-061 - 0304 | Hacettepe University<br>Faculty of Medicine Ethics<br>Committee Hacettepe<br>Universitesi Etik Kurul ve<br>Komisyonlari<br>Ankara, Ankara 06100<br>Turkey                                                                                                                            | Central IRB/IEC<br>Approval of<br>Protocol<br>Amendment # 7  | 08-DEC-2016 |

|        |                    |                                                                                                                                                                                                                                                                                      |                                                              |             |
|--------|--------------------|--------------------------------------------------------------------------------------------------------------------------------------------------------------------------------------------------------------------------------------------------------------------------------------|--------------------------------------------------------------|-------------|
|        |                    | Hacettepe University<br>Faculty of Medicine Ethics<br>Committee Hacettepe<br>Universitesi Etik Kurul<br>ve Komisyonlari                                                                                                                                                              |                                                              |             |
| Turkey | 3475-061 -<br>0304 | Hacettepe University<br>Faculty of Medicine Ethics<br>Committee Hacettepe<br>Universitesi Etik Kurul ve<br>Komisyonlari<br>Ankara, Ankara 06100<br>Turkey<br>Hacettepe University<br>Faculty of Medicine Ethics<br>Committee Hacettepe<br>Universitesi Etik Kurul<br>ve Komisyonlari | Central IRB/IEC<br>Approval of<br>Protocol<br>Amendment # 9  | 05-DEC-2017 |
| Turkey | 3475-061 -<br>0305 | Hacettepe University<br>Faculty of Medicine Ethics<br>Committee Hacettepe<br>Universitesi Etik Kurul ve<br>Komisyonlari<br>Ankara, Ankara 06100                                                                                                                                      | Central IRB/IEC<br>Approval of<br>Protocol                   | 21-MAY-2015 |
| Turkey | 3475-061 -<br>0305 | Hacettepe University<br>Faculty of Medicine Ethics<br>Committee Hacettepe<br>Universitesi Etik Kurul ve<br>Komisyonlari<br>Ankara, Ankara 06100                                                                                                                                      | Central IRB/IEC<br>Approval of<br>Protocol<br>Amendment # 11 | 03-APR-2018 |
| Turkey | 3475-061 -<br>0305 | Hacettepe University<br>Faculty of Medicine Ethics<br>Committee Hacettepe<br>Universitesi Etik Kurul ve<br>Komisyonlari<br>Ankara, Ankara 06100                                                                                                                                      | Central IRB/IEC<br>Approval of<br>Protocol<br>Amendment # 2  | 23-JUL-2015 |
| Turkey | 3475-061 -<br>0305 | Hacettepe University<br>Faculty of Medicine Ethics<br>Committee Hacettepe<br>Universitesi Etik Kurul ve<br>Komisyonlari<br>Ankara, Ankara 06100                                                                                                                                      | Central IRB/IEC<br>Approval of<br>Protocol<br>Amendment # 5  | 31-MAR-2016 |
| Turkey | 3475-061 -<br>0305 | Hacettepe University<br>Faculty of Medicine Ethics<br>Committee Hacettepe<br>Universitesi Etik Kurul ve<br>Komisyonlari<br>Ankara, Ankara 06100                                                                                                                                      | Central IRB/IEC<br>Approval of<br>Protocol<br>Amendment # 7  | 08-DEC-2016 |
| Turkey | 3475-061 -<br>0305 | Hacettepe University<br>Faculty of Medicine Ethics<br>Committee Hacettepe<br>Universitesi Etik Kurul ve<br>Komisyonlari<br>Ankara, Ankara 06100                                                                                                                                      | Central IRB/IEC<br>Approval of<br>Protocol<br>Amendment # 9  | 05-DEC-2017 |
| Turkey | 3475-061 -<br>0306 | Hacettepe University<br>Faculty of Medicine Ethics<br>Committee Hacettepe<br>Universitesi Etik Kurul ve<br>Komisyonlari<br>Ankara, Ankara 06100                                                                                                                                      | Central IRB/IEC<br>Approval of<br>Protocol                   | 21-MAY-2015 |
| Turkey | 3475-061 -         | Hacettepe University                                                                                                                                                                                                                                                                 | Central IRB/IEC                                              | 03-APR-2018 |

|              |                 |                                                                                                                                                      |                                                    |             |
|--------------|-----------------|------------------------------------------------------------------------------------------------------------------------------------------------------|----------------------------------------------------|-------------|
|              | 0306            | Faculty of Medicine Ethics Committee Hacettepe Universitesi Etik Kurul ve Komisyonlari<br>Ankara, Ankara 06100                                       | Approval of Protocol Amendment # 11                |             |
| Turkey       | 3475-061 - 0306 | Hacettepe University Faculty of Medicine Ethics Committee Hacettepe Universitesi Etik Kurul ve Komisyonlari<br>Ankara, Ankara 06100                  | Central IRB/IEC Approval of Protocol Amendment # 2 | 23-JUL-2015 |
| Turkey       | 3475-061 - 0306 | Hacettepe University Faculty of Medicine Ethics Committee Hacettepe Universitesi Etik Kurul ve Komisyonlari<br>Ankara, Ankara 06100                  | Central IRB/IEC Approval of Protocol Amendment # 5 | 31-MAR-2016 |
| Turkey       | 3475-061 - 0306 | Hacettepe University Faculty of Medicine Ethics Committee Hacettepe Universitesi Etik Kurul ve Komisyonlari<br>Ankara, Ankara 06100                  | Central IRB/IEC Approval of Protocol Amendment # 7 | 08-DEC-2016 |
| Turkey       | 3475-061 - 0306 | Hacettepe University Faculty of Medicine Ethics Committee Hacettepe Universitesi Etik Kurul ve Komisyonlari<br>Ankara, Ankara 06100                  | Central IRB/IEC Approval of Protocol Amendment # 9 | 05-DEC-2017 |
| South Africa | 3475-061 - 0320 | U.C.T. Research Ethics Committee E52, Room 24, Old Main Building Groote Schuur Hospital<br>Faculty of Health Sciences Observatory, Western Cape 7925 | Central IRB/IEC Approval of Protocol Amendment # 5 | 07-JAN-2016 |
| South Africa | 3475-061 - 0320 | U.C.T. Research Ethics Committee E52, Room 24, Old Main Building Groote Schuur Hospital<br>Faculty of Health Sciences Observatory, Western Cape 7925 | Central IRB/IEC Approval of Protocol Amendment # 9 |             |
| South Africa | 3475-061 - 0320 | U.C.T. Research Ethics Committee E52, Room 24, Old Main Building Groote Schuur Hospital<br>Faculty of Health Sciences Observatory, Western Cape 7925 | IRB/IEC Approval of Protocol                       | 24-AUG-2015 |
| South Africa | 3475-061 - 0320 | U.C.T. Research Ethics Committee E52, Room 24, Old Main Building Groote Schuur Hospital<br>Faculty of Health Sciences Observatory, Western Cape 7925 | IRB/IEC Approval of Protocol Amendment # 2         | 11-SEP-2015 |
| South Africa | 3475-061 - 0320 | U.C.T. Research Ethics Committee E52, Room 24, Old Main Building Groote Schuur Hospital<br>Faculty of Health Sciences Observatory, Western Cape 7925 | IRB/IEC Approval of Protocol Amendment # 5         | 16-FEB-2016 |
| South Africa | 3475-061 -      |                                                                                                                                                      | Central IRB/IEC                                    | 07-JAN-2016 |

|              |                 |                                                                                                      |                                                    |             |
|--------------|-----------------|------------------------------------------------------------------------------------------------------|----------------------------------------------------|-------------|
|              |                 |                                                                                                      | Approval                                           |             |
| South Africa | 3475-061 -      |                                                                                                      | Central IRB/IEC Approval                           |             |
| South Africa | 3475-061 -      |                                                                                                      | IRB/IEC Approval of                                | 30-JUL-2015 |
| South Africa | 3475-061 -      |                                                                                                      | IRB/IEC Approval of                                | 20-AUG-2015 |
| South Africa | 3475-061 -      |                                                                                                      | IRB/IEC Approval of                                | 07-JAN-2016 |
| South Africa | 3475-061 -      |                                                                                                      | Central IRB/IEC Approval                           | 07-JAN-2016 |
| South Africa | 3475-061 -      |                                                                                                      | Central IRB/IEC Approval                           |             |
| South Africa | 3475-061 -      |                                                                                                      | IRB/IEC Approval of                                | 30-JUL-2015 |
| South Africa | 3475-061 -      |                                                                                                      | IRB/IEC Approval of                                | 20-AUG-2015 |
| South Africa | 3475-061 -      |                                                                                                      | IRB/IEC Approval of                                | 07-JAN-2016 |
| South Africa | 3475-061 -      |                                                                                                      | Central IRB/IEC Approval                           | 07-JAN-2016 |
| South Africa | 3475-061 -      |                                                                                                      | Central IRB/IEC Approval                           |             |
| South Africa | 3475-061 -      |                                                                                                      | IRB/IEC Approval of                                | 09-NOV-2015 |
| South Africa | 3475-061 -      |                                                                                                      | IRB/IEC Approval of                                | 31-MAR-2016 |
| South Africa | 3475-061 -      |                                                                                                      | Central IRB/IEC Approval                           | 07-JAN-2016 |
| South Africa | 3475-061 -      |                                                                                                      | Central IRB/IEC Approval                           |             |
| South Africa | 3475-061 -      |                                                                                                      | IRB/IEC Approval of                                | 30-JUL-2015 |
| South Africa | 3475-061 -      |                                                                                                      | IRB/IEC Approval of                                | 20-AUG-2015 |
| South Africa | 3475-061 -      |                                                                                                      | IRB/IEC Approval of                                | 23-DEC-2015 |
| South Africa | 3475-061 - 0325 | Human Research Ethics Committee IRB/IEC<br>8 Blackwood Avenue<br>Suite 189<br>Houghton, Gauteng 2041 | Central IRB/IEC Approval of Protocol Amendment # 5 | 07-JAN-2016 |
| South Africa | 3475-061 - 0325 | Human Research Ethics Committee IRB/IEC<br>8 Blackwood Avenue<br>Suite 189<br>Houghton, Gauteng 2041 | Central IRB/IEC Approval of Protocol Amendment # 9 |             |
| South Africa | 3475-061 - 0325 | Human Research Ethics Committee IRB/IEC<br>8 Blackwood Avenue<br>Suite 189<br>Houghton, Gauteng 2041 | IRB/IEC Approval of Protocol                       | 30-JUL-2015 |
| South Africa | 3475-061 - 0325 | Human Research Ethics Committee IRB/IEC<br>8 Blackwood Avenue<br>Suite 189<br>Houghton, Gauteng 2041 | IRB/IEC Approval of Protocol Amendment # 2         | 20-AUG-2015 |
| South Africa | 3475-061 - 0325 | Human Research Ethics Committee IRB/IEC                                                              | IRB/IEC Approval of                                | 23-DEC-2015 |

|              |                    |                                                                                                                                                                        |                                                              |             |
|--------------|--------------------|------------------------------------------------------------------------------------------------------------------------------------------------------------------------|--------------------------------------------------------------|-------------|
|              |                    | 8 Blackwood Avenue<br>Suite 189<br>Houghton, Gauteng 2041                                                                                                              | Protocol<br>Amendment # 5                                    |             |
| South Africa | 3475-061 -         |                                                                                                                                                                        | Central IRB/IEC<br>Approval                                  | 07-JAN-2016 |
| South Africa | 3475-061 -         |                                                                                                                                                                        | Central IRB/IEC<br>Approval                                  |             |
| South Africa | 3475-061 -         |                                                                                                                                                                        | IRB/IEC<br>Approval of                                       | 30-JUL-2015 |
| South Africa | 3475-061 -         |                                                                                                                                                                        | IRB/IEC<br>Approval of                                       | 20-AUG-2015 |
| South Africa | 3475-061 -         |                                                                                                                                                                        | IRB/IEC<br>Approval of                                       | 23-DEC-2015 |
| South Africa | 3475-061 -         |                                                                                                                                                                        | Central IRB/IEC<br>Approval                                  | 07-JAN-2016 |
| South Africa | 3475-061 -         |                                                                                                                                                                        | Central IRB/IEC<br>Approval                                  |             |
| South Africa | 3475-061 -         |                                                                                                                                                                        | IRB/IEC<br>Approval of                                       | 30-JUL-2015 |
| South Africa | 3475-061 -         |                                                                                                                                                                        | IRB/IEC<br>Approval of                                       | 20-AUG-2015 |
| Russia       | 3475-061 -<br>0336 | Altay Regional Oncology<br>Dispensary 77, Nikitina str.<br>Local Ethics Commetee within the<br>Altay Regional Oncology<br>Dispensary<br>Barnaul, Altayskiy kray 656049 | Central IRB/IEC<br>Approval of<br>Protocol<br>Amendment # 11 | 16-FEB-2018 |
| Russia       | 3475-061 -<br>0336 | Altay Regional Oncology<br>Dispensary 77, Nikitina str.<br>Local Ethics Commetee within the<br>Altay Regional Oncology<br>Dispensary<br>Barnaul, Altayskiy kray 656049 | Central IRB/IEC<br>Approval of<br>Protocol<br>Amendment # 2  | 28-AUG-2015 |
| Russia       | 3475-061 -<br>0336 | Altay Regional Oncology<br>Dispensary 77, Nikitina str.<br>Local Ethics Commetee within the<br>Altay Regional Oncology<br>Dispensary<br>Barnaul, Altayskiy kray 656049 | Central IRB/IEC<br>Approval of<br>Protocol<br>Amendment # 5  | 11-MAR-2016 |
| Russia       | 3475-061 -<br>0336 | Altay Regional Oncology<br>Dispensary 77, Nikitina str.<br>Local Ethics Commetee within the<br>Altay Regional Oncology<br>Dispensary<br>Barnaul, Altayskiy kray 656049 | Central IRB/IEC<br>Approval of<br>Protocol<br>Amendment # 7  | 21-MAR-2017 |
| Russia       | 3475-061 -<br>0336 | Altay Regional Oncology<br>Dispensary 77, Nikitina str.<br>Local Ethics Commetee within the<br>Altay Regional Oncology<br>Dispensary<br>Barnaul, Altayskiy kray 656049 | Central IRB/IEC<br>Approval of<br>Protocol<br>Amendment # 9  | 12-OCT-2017 |
| Russia       | 3475-061 -<br>0336 | Altay Regional Oncology<br>Dispensary 77, Nikitina str.<br>Local Ethics Commetee within the<br>Altay Regional Oncology<br>Dispensary<br>Barnaul, Altayskiy kray 656049 | IRB/IEC Approval<br>of Protocol                              | 06-APR-2015 |
| Russia       | 3475-061 -<br>0336 | Altay Regional Oncology<br>Dispensary 77, Nikitina str.                                                                                                                | IRB/IEC<br>Approval of                                       | 24-SEP-2015 |

|        |                 |                                                                                                                                                                                                 |                                                     |             |
|--------|-----------------|-------------------------------------------------------------------------------------------------------------------------------------------------------------------------------------------------|-----------------------------------------------------|-------------|
|        |                 | Local Ethics Committee within the Altay Regional Oncology Dispensary<br>Barnaul, Altayskiy kray 656049                                                                                          | Protocol Amendment # 2                              |             |
| Russia | 3475-061 - 0336 | Altay Regional Oncology Dispensary 77, Nikitina str.<br>Local Ethics Committee within the Altay Regional Oncology Dispensary<br>Barnaul, Altayskiy kray 656049                                  | IRB/IEC Approval of Protocol Amendment # 5          | 30-MAR-2016 |
| Russia | 3475-061 - 0336 | Altay Regional Oncology Dispensary 77, Nikitina str.<br>Local Ethics Committee within the Altay Regional Oncology Dispensary<br>Barnaul, Altayskiy kray 656049                                  | IRB/IEC Approval of Protocol Amendment # 7          | 03-APR-2017 |
| Russia | 3475-061 - 0337 | Scientific-Clinical Center of Oncology and Neurology Biotherapy<br>4/1, Institutskaya str.<br>Local Ethics Committee within the Scientific and Clinical Center of Oncology and Neuro Biotherapy | Central IRB/IEC Approval of Protocol Amendment # 11 | 16-FEB-2018 |
| Russia | 3475-061 - 0337 | Scientific-Clinical Center of Oncology and Neurology Biotherapy<br>4/1, Institutskaya str.<br>Local Ethics Committee within the Scientific and Clinical Center of Oncology and Neuro Biotherapy | Central IRB/IEC Approval of Protocol Amendment # 2  | 28-AUG-2015 |
| Russia | 3475-061 - 0337 | Scientific-Clinical Center of Oncology and Neurology Biotherapy 4/1, Institutskaya str.<br>Local Ethics Committee within the Scientific and Clinical Center of Oncology and Neuro Biotherapy    | Central IRB/IEC Approval of Protocol Amendment # 5  | 11-MAR-2016 |
| Russia | 3475-061 - 0337 | Scientific-Clinical Center of Oncology and Neurology Biotherapy<br>4/1, Institutskaya str.<br>Local Ethics Committee within the Scientific and Clinical Center of Oncology and Neuro Biotherapy | Central IRB/IEC Approval of Protocol Amendment # 7  | 21-MAR-2017 |
| Russia | 3475-061 - 0337 | Scientific-Clinical Center of Oncology and Neurology Biotherapy 4/1, Institutskaya str.<br>Local Ethics Committee within the Scientific and Clinical Center of Oncology and Neuro Biotherapy    | Central IRB/IEC Approval of Protocol Amendment # 9  | 12-OCT-2017 |
| Russia | 3475-061 - 0337 | Scientific-Clinical Center of Oncology and Neurology Biotherapy 4/1, Institutskaya str.<br>Local Ethics Committee within the                                                                    | IRB/IEC Approval of Protocol                        | 07-APR-2015 |



|        |                 |                                                                                                                                                                                       |                                                     |             |
|--------|-----------------|---------------------------------------------------------------------------------------------------------------------------------------------------------------------------------------|-----------------------------------------------------|-------------|
|        |                 | Scientific and Clinical Center of Oncology and Neurotherapy                                                                                                                           |                                                     |             |
| Russia | 3475-061 - 0337 | Scientific-Clinical Center of Oncology and Neurology Biotherapy 4/1, Institutskaya str. Local Ethics Committee within the Scientific and Clinical Center of Oncology and Neurotherapy | IRB/IEC Approval of Protocol Amendment # 2          | 29-SEP-2015 |
| Russia | 3475-061 - 0337 | Scientific-Clinical Center of Oncology and Neurology Biotherapy 4/1, Institutskaya str. Local Ethics Committee within the Scientific and Clinical Center of Oncology and Neurotherapy | IRB/IEC Approval of Protocol Amendment # 5          | 11-APR-2016 |
| Russia | 3475-061 - 0337 | Scientific-Clinical Center of Oncology and Neurology Biotherapy 4/1, Institutskaya str. Local Ethics Committee within the Scientific and Clinical Center of Oncology and Neurotherapy | IRB/IEC Approval of Protocol Amendment # 7          | 10-APR-2017 |
| Russia | 3475-061 - 0339 | Tomsk Scientific Research Institute of Oncology 12/1 Savinykh St Local Ethics Committee within the Tomsk Scientific Research Institute of Oncology                                    | Central IRB/IEC Approval of Protocol Amendment # 11 | 16-FEB-2018 |
| Russia | 3475-061 - 0339 | Tomsk Scientific Research Institute of Oncology 12/1 Savinykh St Local Ethics Committee within the Tomsk Scientific Research Institute of Oncology                                    | Central IRB/IEC Approval of Protocol Amendment # 2  | 28-AUG-2015 |
| Russia | 3475-061 - 0339 | Tomsk Scientific Research Institute of Oncology 12/1 Savinykh St Local Ethics Committee within the Tomsk Scientific Research Institute of Oncology                                    | Central IRB/IEC Approval of Protocol Amendment # 5  | 11-MAR-2016 |
| Russia | 3475-061 - 0339 | Tomsk Scientific Research Institute of Oncology 12/1 Savinykh St Local Ethics Committee within the Tomsk Scientific Research Institute of Oncology                                    | Central IRB/IEC Approval of Protocol Amendment # 7  | 21-MAR-2017 |
| Russia | 3475-061 - 0339 | Tomsk Scientific Research Institute of Oncology 12/1 Savinykh St Local Ethics Committee within the Tomsk Scientific Research Institute                                                | Central IRB/IEC Approval of Protocol Amendment # 9  | 12-OCT-2017 |

|        |                 |                                                                                                                                                           |                                                     |             |
|--------|-----------------|-----------------------------------------------------------------------------------------------------------------------------------------------------------|-----------------------------------------------------|-------------|
|        |                 | of Oncology                                                                                                                                               |                                                     |             |
| Russia | 3475-061 - 0339 | Tomsk Scientific Research Institute of Oncology<br>12/1 Savinykh St<br>Local Ethics Committee within the Tomsk Scientific Research Institute of Oncology  | IRB/IEC Approval of Protocol                        | 10-APR-2015 |
| Russia | 3475-061 - 0339 | Tomsk Scientific Research Institute of Oncology<br>12/1 Savinykh St<br>Local Ethics Committee within the Tomsk Scientific Research Institute of Oncology  | IRB/IEC Approval of Protocol Amendment # 2          | 26-SEP-2015 |
| Russia | 3475-061 - 0339 | Tomsk Scientific Research Institute of Oncology<br>12/1 Savinykh St<br>Local Ethics Committee within the Tomsk Scientific Research Institute of Oncology  | IRB/IEC Approval of Protocol Amendment # 5          | 30-MAR-2016 |
| Russia | 3475-061 - 0339 | Tomsk Scientific Research Institute of Oncology<br>12/1 Savinykh St<br>Local Ethics Committee within the Tomsk Scientific Research Institute of Oncology  | IRB/IEC Approval of Protocol Amendment # 7          | 07-APR-2017 |
| Russia | 3475-061 - 0340 | Clinical Research Center of specialized types medical care-Oncology<br>68A lit A Leningradskaya st. pos. Pesochny<br>Saint Petersburg, Sankt-Peterburg    | Central IRB/IEC Approval of Protocol Amendment # 11 | 16-FEB-2018 |
| Russia | 3475-061 - 0340 | Clinical Research Center of specialized types medical care-Oncology<br>68A lit A<br>Leningradskaya st. pos. Pesochny<br>Saint Petersburg, Sankt-Peterburg | Central IRB/IEC Approval of Protocol Amendment # 2  | 28-AUG-2015 |
| Russia | 3475-061 - 0340 | Clinical Research Center of specialized types medical care-Oncology<br>68A lit A<br>Leningradskaya st. pos. Pesochny<br>Saint Petersburg, Sankt-Peterburg | Central IRB/IEC Approval of Protocol Amendment # 5  | 11-MAR-2016 |
| Russia | 3475-061 - 0340 | Clinical Research Center of specialized types medical care-Oncology<br>68A lit A<br>Leningradskaya st. pos. Pesochny<br>Saint Petersburg, Sankt-Peterburg | Central IRB/IEC Approval of Protocol Amendment # 7  | 21-MAR-2017 |
| Russia | 3475-061 - 0340 | Clinical Research Center of specialized types medical care-Oncology<br>68A lit A<br>Leningradskaya st. pos. Pesochny<br>Saint Petersburg, Sankt-Peterburg | Central IRB/IEC Approval of Protocol Amendment # 9  | 12-OCT-2017 |
| Russia | 3475-061 -      | Clinical Research Center of                                                                                                                               | IRB/IEC Approval                                    | 25-MAY-2015 |

|        |                    |                                                                                                                                                                     |                                                              |             |
|--------|--------------------|---------------------------------------------------------------------------------------------------------------------------------------------------------------------|--------------------------------------------------------------|-------------|
|        | 0340               | specialized types medical care-<br>Oncology<br>68A lit A<br>Leningradskaya st. pos.<br>Pesochny<br>Saint Petersburg, Sankt-Peterburg                                | of Protocol                                                  |             |
| Russia | 3475-061 -<br>0340 | Clinical Research Center of<br>specialized types medical care-<br>Oncology<br>68A lit A<br>Leningradskaya st. pos.<br>Pesochny<br>Saint Petersburg, Sankt-Peterburg | IRB/IEC<br>Approval of<br>Protocol<br>Amendment # 11         | 28-MAR-2018 |
| Russia | 3475-061 -<br>0340 | Clinical Research Center of<br>specialized types medical care-<br>Oncology<br>68A lit A<br>Leningradskaya st. pos.<br>Pesochny<br>Saint Petersburg, Sankt-Peterburg | IRB/IEC<br>Approval of<br>Protocol<br>Amendment # 2          | 16-OCT-2015 |
| Russia | 3475-061 -<br>0340 | Clinical Research Center of<br>specialized types medical care-<br>Oncology<br>68A lit A<br>Leningradskaya st. pos.<br>Pesochny<br>Saint Petersburg, Sankt-Peterburg | IRB/IEC<br>Approval of<br>Protocol<br>Amendment # 9          | 27-NOV-2017 |
| Russia | 3475-061 -<br>0341 | Leningrad Regional Oncology<br>Center 2 Zaozernaya St<br>Kuzmolovskiy Settlement<br>Saint-Petersburg, Sankt-Peterburg<br>188663                                     | Central IRB/IEC<br>Approval of<br>Protocol<br>Amendment # 11 | 16-FEB-2018 |
| Russia | 3475-061 -<br>0341 | Leningrad Regional Oncology<br>Center<br>2 Zaozernaya St<br>Kuzmolovskiy<br>Settlement<br>Saint-Petersburg, Sankt-Peterburg<br>188663                               | Central IRB/IEC<br>Approval<br>of Protocol<br>Amendment # 2  | 28-AUG-2015 |
| Russia | 3475-061 -<br>0341 | Leningrad Regional Oncology<br>Center 2 Zaozernaya St<br>Kuzmolovskiy Settlement<br>Saint-Petersburg, Sankt-Peterburg<br>188663                                     | Central IRB/IEC<br>Approval of<br>Protocol<br>Amendment # 5  | 11-MAR-2016 |
| Russia | 3475-061 -<br>0341 | Leningrad Regional Oncology<br>Center<br>2 Zaozernaya St<br>Kuzmolovskiy<br>Settlement<br>Saint-Petersburg, Sankt-Peterburg<br>188663                               | Central IRB/IEC<br>Approval<br>of Protocol<br>Amendment # 7  | 21-MAR-2017 |
| Russia | 3475-061 -<br>0341 | Leningrad Regional Oncology<br>Center 2 Zaozernaya St<br>Kuzmolovskiy Settlement<br>Saint-Petersburg, Sankt-Peterburg<br>188663                                     | Central IRB/IEC<br>Approval of<br>Protocol<br>Amendment # 9  | 12-OCT-2017 |
| Russia | 3475-061 -<br>0341 | Leningrad Regional Oncology<br>Center<br>2 Zaozernaya St<br>Kuzmolovskiy                                                                                            | IRB/IEC<br>Approval of<br>Protocol                           | 21-MAY-2015 |

|        |                    |                                                                                                                                       |                                                              |             |
|--------|--------------------|---------------------------------------------------------------------------------------------------------------------------------------|--------------------------------------------------------------|-------------|
|        |                    | Settlement<br>Saint-Petersburg, Sankt-Peterburg<br>188663                                                                             |                                                              |             |
| Russia | 3475-061 -<br>0341 | Leningrad Regional Oncology<br>Center 2 Zaozernaya St<br>Kuzmolovskiy Settlement<br>Saint-Petersburg, Sankt-Peterburg<br>188663       | IRB/IEC<br>Approval of<br>Protocol<br>Amendment # 11         | 15-MAR-2018 |
| Russia | 3475-061 -<br>0341 | Leningrad Regional Oncology<br>Center<br>2 Zaozernaya St<br>Kuzmolovskiy<br>Settlement<br>Saint-Petersburg, Sankt-Peterburg<br>188663 | IRB/IEC<br>Approval of<br>Protocol<br>Amendment # 2          | 19-NOV-2015 |
| Russia | 3475-061 -<br>0341 | Leningrad Regional Oncology<br>Center 2 Zaozernaya St<br>Kuzmolovskiy Settlement<br>Saint-Petersburg, Sankt-Peterburg<br>188663       | IRB/IEC<br>Approval of<br>Protocol<br>Amendment # 9          | 23-NOV-2017 |
| Russia | 3475-061 -<br>0343 | Scientific Research Oncology<br>Institute<br>n.a. N.N.Petrov<br>68 Leningradskaya St<br>Saint-Petersburg, Sankt-Peterburg             | Central IRB/IEC<br>Approval<br>of Protocol<br>Amendment # 11 | 16-FEB-2018 |
| Russia | 3475-061 -<br>0343 | Scientific Research Oncology<br>Institute<br>n.a. N.N.Petrov<br>68 Leningradskaya St<br>Saint-Petersburg, Sankt-Peterburg             | Central IRB/IEC<br>Approval of<br>Protocol<br>Amendment # 2  | 28-AUG-2015 |
| Russia | 3475-061 -<br>0343 | Scientific Research Oncology<br>Institute<br>n.a. N.N.Petrov<br>68 Leningradskaya St<br>Saint-Petersburg, Sankt-Peterburg             | Central IRB/IEC<br>Approval of<br>Protocol<br>Amendment # 5  | 11-MAR-2016 |
| Russia | 3475-061 -<br>0343 | Scientific Research Oncology<br>Institute<br>n.a. N.N.Petrov<br>68 Leningradskaya St<br>Saint-Petersburg, Sankt-Peterburg             | Central IRB/IEC<br>Approval of<br>Protocol<br>Amendment # 9  | 12-OCT-2017 |
| Russia | 3475-061 -<br>0343 | Scientific Research Oncology<br>Institute<br>n.a. N.N.Petrov<br>68 Leningradskaya St<br>Saint-Petersburg, Sankt-Peterburg             | IRB/IEC Approval<br>of Protocol                              | 16-APR-2015 |
| Russia | 3475-061 -<br>0343 | Scientific Research Oncology<br>Institute<br>n.a. N.N.Petrov<br>68 Leningradskaya St<br>Saint-Petersburg, Sankt-Peterburg             | IRB/IEC<br>Approval of<br>Protocol<br>Amendment # 11         | 28-APR-2018 |
| Russia | 3475-061 -<br>0343 | Scientific Research Oncology<br>Institute<br>n.a. N.N.Petrov<br>68 Leningradskaya St<br>Saint-Petersburg, Sankt-Peterburg             | IRB/IEC<br>Approval of<br>Protocol<br>Amendment # 2          | 17-DEC-2015 |
| Russia | 3475-061 -<br>0343 | Scientific Research Oncology<br>Institute<br>n.a. N.N.Petrov<br>68 Leningradskaya St<br>Saint-Petersburg, Sankt-Peterburg             | IRB/IEC<br>Approval of<br>Protocol<br>Amendment # 9          | 24-NOV-2017 |

|        |                 |                                                                                                                                           |                                                              |             |
|--------|-----------------|-------------------------------------------------------------------------------------------------------------------------------------------|--------------------------------------------------------------|-------------|
| Russia | 3475-061 - 0346 | Orenburg Regional Clinical Oncology Dispensary<br>11 Gagarina prospect<br>Orenburg, Orenburgskaya oblast                                  | Central IRB/IEC<br>Approval of<br>Protocol<br>Amendment # 11 | 16-FEB-2018 |
| Russia | 3475-061 - 0346 | Orenburg Regional Clinical Oncology Dispensary<br>11 Gagarina prospect<br>Orenburg, Orenburgskaya oblast                                  | Central IRB/IEC<br>Approval of<br>Protocol<br>Amendment # 2  | 28-AUG-2015 |
| Russia | 3475-061 - 0346 | Orenburg Regional Clinical Oncology Dispensary<br>11 Gagarina prospect<br>Orenburg, Orenburgskaya oblast                                  | Central IRB/IEC<br>Approval of<br>Protocol<br>Amendment # 5  | 11-MAR-2016 |
| Russia | 3475-061 - 0346 | Orenburg Regional Clinical Oncology Dispensary<br>11 Gagarina prospect<br>Orenburg, Orenburgskaya oblast                                  | Central IRB/IEC<br>Approval of<br>Protocol<br>Amendment # 7  | 21-MAR-2017 |
| Russia | 3475-061 - 0346 | Orenburg Regional Clinical Oncology Dispensary<br>11 Gagarina prospect<br>Orenburg, Orenburgskaya oblast                                  | Central IRB/IEC<br>Approval of<br>Protocol<br>Amendment # 9  | 12-OCT-2017 |
| Russia | 3475-061 - 0346 | Orenburg Regional Clinical Oncology Dispensary<br>11 Gagarina prospect<br>Orenburg, Orenburgskaya oblast                                  | IRB/IEC Approval<br>of Protocol                              | 30-APR-2015 |
| Russia | 3475-061 - 0346 | Orenburg Regional Clinical Oncology Dispensary<br>11 Gagarina prospect<br>Orenburg, Orenburgskaya oblast                                  | IRB/IEC<br>Approval of<br>Protocol<br>Amendment # 2          | 05-OCT-2015 |
| Russia | 3475-061 - 0346 | Orenburg Regional Clinical Oncology Dispensary<br>11 Gagarina prospect<br>Orenburg, Orenburgskaya oblast                                  | IRB/IEC<br>Approval of<br>Protocol<br>Amendment # 5          | 31-MAR-2016 |
| Russia | 3475-061 - 0346 | Orenburg Regional Clinical Oncology Dispensary<br>11 Gagarina prospect<br>Orenburg, Orenburgskaya oblast                                  | IRB/IEC<br>Approval of<br>Protocol<br>Amendment # 7          | 31-AUG-2017 |
| Russia | 3475-061 - 0346 | Orenburg Regional Clinical Oncology Dispensary<br>11 Gagarina prospect<br>Orenburg, Orenburgskaya oblast                                  | IRB/IEC<br>Approval of<br>Protocol<br>Amendment # 9          | 27-NOV-2017 |
| Russia | 3475-061 - 0347 | LEC of Bashkortostan<br>Republican Clinical<br>Oncology Dispensary 73/1<br>Oktyabrya prospekt.<br>Ufa, Baskortostan, Respublika<br>450054 | Central IRB/IEC<br>Approval of<br>Protocol<br>Amendment # 11 | 16-FEB-2018 |
| Russia | 3475-061 - 0347 | LEC of Bashkortostan<br>Republican Clinical<br>Oncology Dispensary 73/1<br>Oktyabrya prospekt.<br>Ufa, Baskortostan, Respublika<br>450054 | Central IRB/IEC<br>Approval of<br>Protocol<br>Amendment # 2  | 28-AUG-2015 |
| Russia | 3475-061 - 0347 | LEC of Bashkortostan<br>Republican Clinical<br>Oncology Dispensary 73/1<br>Oktyabrya prospekt.<br>Ufa, Baskortostan, Respublika<br>450054 | Central IRB/IEC<br>Approval of<br>Protocol<br>Amendment # 5  | 11-MAR-2016 |
| Russia | 3475-061 - 0347 | LEC of Bashkortostan<br>Republican Clinical                                                                                               | Central IRB/IEC<br>Approval of                               | 21-MAR-2017 |

|        |                    |                                                                                                                                           |                                                              |             |
|--------|--------------------|-------------------------------------------------------------------------------------------------------------------------------------------|--------------------------------------------------------------|-------------|
|        |                    | Oncology Dispensary 73/1<br>Oktyabrya prospekt.<br>Ufa, Baskortostan, Respublika<br>450054                                                | Protocol<br>Amendment # 7                                    |             |
| Russia | 3475-061 -<br>0347 | LEC of Bashkortostan<br>Republican Clinical<br>Oncology Dispensary 73/1<br>Oktyabrya prospekt.<br>Ufa, Baskortostan, Respublika<br>450054 | Central IRB/IEC<br>Approval of<br>Protocol<br>Amendment # 9  | 12-OCT-2017 |
| Russia | 3475-061 -<br>0347 | LEC of Bashkortostan<br>Republican Clinical<br>Oncology Dispensary 73/1<br>Oktyabrya prospekt.<br>Ufa, Baskortostan, Respublika<br>450054 | IRB/IEC Approval<br>of Protocol                              | 30-APR-2015 |
| Russia | 3475-061 -<br>0347 | LEC of Bashkortostan<br>Republican Clinical<br>Oncology Dispensary 73/1<br>Oktyabrya prospekt.<br>Ufa, Baskortostan, Respublika<br>450054 | IRB/IEC<br>Approval of<br>Protocol<br>Amendment # 2          | 29-OCT-2015 |
| Russia | 3475-061 -<br>0347 | LEC of Bashkortostan<br>Republican Clinical<br>Oncology Dispensary 73/1<br>Oktyabrya prospekt.<br>Ufa, Baskortostan, Respublika<br>450054 | IRB/IEC<br>Approval of<br>Protocol<br>Amendment # 5          | 31-MAR-2016 |
| Russia | 3475-061 -<br>0347 | LEC of Bashkortostan<br>Republican Clinical<br>Oncology Dispensary 73/1<br>Oktyabrya prospekt.<br>Ufa, Baskortostan, Respublika<br>450054 | IRB/IEC<br>Approval of<br>Protocol<br>Amendment # 7          | 20-APR-2017 |
| Russia | 3475-061 -<br>0347 | LEC of Bashkortostan<br>Republican Clinical<br>Oncology Dispensary 73/1<br>Oktyabrya prospekt.<br>Ufa, Baskortostan, Respublika<br>450054 | IRB/IEC<br>Approval of<br>Protocol<br>Amendment # 9          | 23-NOV-2017 |
| Russia | 3475-061 -<br>0348 | Chelyabinsk Regional<br>Childrens Hospital<br>42A Blukhera street..<br>Chelyabinsk, Chelyabinskaya<br>oblast                              | Central IRB/IEC<br>Approval of<br>Protocol<br>Amendment # 11 | 16-FEB-2018 |
| Russia | 3475-061 -<br>0348 | Chelyabinsk Regional<br>Childrens Hospital<br>42A Blukhera street..<br>Chelyabinsk, Chelyabinskaya<br>oblast                              | Central IRB/IEC<br>Approval of<br>Protocol<br>Amendment # 2  | 28-AUG-2015 |
| Russia | 3475-061 -<br>0348 | Chelyabinsk Regional<br>Childrens Hospital<br>42A Blukhera street..<br>Chelyabinsk, Chelyabinskaya<br>oblast                              | Central IRB/IEC<br>Approval of<br>Protocol<br>Amendment # 5  | 11-MAR-2016 |
| Russia | 3475-061 -<br>0348 | Chelyabinsk Regional<br>Childrens Hospital<br>42A Blukhera street..<br>Chelyabinsk, Chelyabinskaya<br>oblast                              | Central IRB/IEC<br>Approval of<br>Protocol<br>Amendment # 7  | 21-MAR-2017 |

|        |                 |                                                                                                        |                                                    |             |
|--------|-----------------|--------------------------------------------------------------------------------------------------------|----------------------------------------------------|-------------|
| Russia | 3475-061 - 0348 | Chelyabinsk Regional Childrens Hospital<br>42A Blukhera street..<br>Chelyabinsk, Chelyabinskaya oblast | Central IRB/IEC Approval of Protocol Amendment # 9 | 12-OCT-2017 |
| Russia | 3475-061 - 0348 | Chelyabinsk Regional Childrens Hospital<br>42A Blukhera street..<br>Chelyabinsk, Chelyabinskaya oblast | IRB/IEC Approval of Protocol                       | 30-APR-2015 |
| Russia | 3475-061 - 0348 | Chelyabinsk Regional Childrens Hospital<br>42A Blukhera street..<br>Chelyabinsk, Chelyabinskaya oblast | IRB/IEC Approval of Protocol Amendment # 2         | 04-SEP-2015 |
| Russia | 3475-061 - 0348 | Chelyabinsk Regional Childrens Hospital<br>42A Blukhera street..<br>Chelyabinsk, Chelyabinskaya oblast | IRB/IEC Approval of Protocol Amendment # 5         | 23-MAR-2016 |
| Russia | 3475-061 - 0348 | Chelyabinsk Regional Childrens Hospital<br>42A Blukhera street..<br>Chelyabinsk, Chelyabinskaya oblast | IRB/IEC Approval of Protocol Amendment # 7         | 19-APR-2017 |
| Russia | 3475-061 - 0348 | Chelyabinsk Regional Childrens Hospital<br>42A Blukhera street..<br>Chelyabinsk, Chelyabinskaya oblast | IRB/IEC Approval of Protocol Amendment # 9         | 22-NOV-2017 |
| Israel | 3475-061 - 0360 | Sourasky Medical Center Weizman 6<br>Helsinki Committee<br>Tel Aviv, N/A 64239 Israel                  | IRB/IEC Approval of Protocol                       | 01-JUL-2015 |
| Israel | 3475-061 - 0360 | Sourasky Medical Center Weizman 6<br>Helsinki Committee Tel Aviv, N/A 64239 Israel                     | IRB/IEC Approval of Protocol Amendment # 2         | 31-JUL-2015 |
| Israel | 3475-061 - 0360 | Sourasky Medical Center Weizman 6<br>Helsinki Committee<br>Tel Aviv, N/A 64239 Israel                  | IRB/IEC Approval of Protocol Amendment # 3         | 29-JAN-2016 |
| Israel | 3475-061 - 0360 | Sourasky Medical Center Weizman 6<br>Helsinki Committee Tel Aviv, N/A 64239 Israel                     | IRB/IEC Approval of Protocol Amendment # 4         | 30-DEC-2016 |
| Israel | 3475-061 - 0360 | Sourasky Medical Center Weizman 6<br>Helsinki Committee<br>Tel Aviv, N/A 64239 Israel                  | IRB/IEC Approval of Protocol Amendment # 9         | 27-OCT-2017 |
| Israel | 3475-061 - 0361 | Sheba Medical Center EC Tel-Hashomer<br>Ramat-Gan, N/A 5265601 Israel                                  | IRB/IEC Approval of Protocol                       | 02-JUN-2015 |
| Israel | 3475-061 - 0361 | Sheba Medical Center EC Tel-Hashomer<br>Ramat-Gan, N/A 5265601 Israel                                  | IRB/IEC Approval of Protocol Amendment # 2         | 02-AUG-2015 |
| Israel | 3475-061 - 0361 | Sheba Medical Center EC Tel-                                                                           | IRB/IEC Approval of                                | 10-JAN-2016 |



|        |                    |                                                                                                                                                                                 |                                                     |             |
|--------|--------------------|---------------------------------------------------------------------------------------------------------------------------------------------------------------------------------|-----------------------------------------------------|-------------|
|        |                    | Hashomer<br>Ramat-Gan, N/A 5265601<br>Israel                                                                                                                                    | Protocol<br>Amendment # 3                           |             |
| Israel | 3475-061 -<br>0361 | Sheba Medical<br>Center EC Tel-<br>Hashomer<br>Ramat-Gan, N/A 5265601<br>Israel                                                                                                 | IRB/IEC<br>Approval of<br>Protocol<br>Amendment # 4 | 04-DEC-2016 |
| Israel | 3475-061 -<br>0361 | Sheba Medical<br>Center EC Tel-<br>Hashomer<br>Ramat-Gan, N/A 5265601<br>Israel                                                                                                 | IRB/IEC<br>Approval of<br>Protocol<br>Amendment # 9 | 06-NOV-2017 |
| Israel | 3475-061 -<br>0362 | Hadassah Medical Center Helsinki<br>Committee<br>Pob 12000<br>Jerusalem, N/A 9112001                                                                                            | IRB/IEC Approval<br>of Protocol                     | 04-JUN-2015 |
| Israel | 3475-061 -<br>0362 | Hadassah Medical Center Helsinki<br>Committee<br>Pob 12000<br>Jerusalem, N/A 9112001                                                                                            | IRB/IEC<br>Approval of<br>Protocol<br>Amendment # 2 | 16-JUL-2015 |
| Israel | 3475-061 -<br>0362 | Hadassah Medical Center Helsinki<br>Committee<br>Pob 12000<br>Jerusalem, N/A 9112001                                                                                            | IRB/IEC<br>Approval of<br>Protocol<br>Amendment # 3 | 14-JAN-2016 |
| Israel | 3475-061 -<br>0362 | Hadassah Medical Center Helsinki<br>Committee<br>Pob 12000<br>Jerusalem, N/A 9112001                                                                                            | IRB/IEC<br>Approval of<br>Protocol<br>Amendment # 4 | 29-JAN-2017 |
| Israel | 3475-061 -<br>0362 | Hadassah Medical Center Helsinki<br>Committee<br>Pob 12000<br>Jerusalem, N/A 9112001                                                                                            | IRB/IEC<br>Approval of<br>Protocol<br>Amendment # 9 | 06-NOV-2017 |
| Israel | 3475-061 -<br>0363 | Rambam - MC -<br>ERC 8 Ha Aliya<br>Street POB 9602<br>Haifa, N/A<br>3109601 Israel<br>Rambam - MC -<br>ERC 8 Haaliya<br>St<br>Ethical Committee<br>Haifa, N/A 3525408 Israel    | IRB/IEC Approval<br>of Protocol                     | 18-JUN-2015 |
| Israel | 3475-061 -<br>0363 | Rambam - MC - ERC<br>8 Ha Aliya<br>Street POB<br>9602<br>Haifa, N/A<br>3109601 Israel<br>Rambam - MC -<br>ERC 8 Haaliya<br>St<br>Ethical Committee<br>Haifa, N/A 3525408 Israel | IRB/IEC<br>Approval of<br>Protocol<br>Amendment # 2 | 31-JUL-2015 |
| Israel | 3475-061 -<br>0363 | Rambam - MC - ERC<br>8 Ha Aliya<br>Street POB<br>9602<br>Haifa, N/A<br>3109601 Israel                                                                                           | IRB/IEC<br>Approval of<br>Protocol<br>Amendment # 3 | 28-JAN-2016 |

|        |                    |                                                                                                                                                                                       |                                                      |             |
|--------|--------------------|---------------------------------------------------------------------------------------------------------------------------------------------------------------------------------------|------------------------------------------------------|-------------|
|        |                    | Rambam - MC -<br>ERC 8 Haaliya<br>St<br>Ethical Committee<br>Haifa, N/A 3525408 Israel                                                                                                |                                                      |             |
| Israel | 3475-061 -<br>0363 | Rambam - MC -<br>ERC 8 Ha Aliya<br>Street POB 9602<br>Haifa, N/A<br>3109601 Israel<br>Rambam - MC -<br>ERC 8 Haaliya<br>St<br>Ethical<br>Committee<br>Haifa, N/A<br>3525408<br>Israel | IRB/IEC<br>Approval of<br>Protocol<br>Amendment # 4  | 08-DEC-2016 |
| Israel | 3475-061 -<br>0363 | Rambam - MC -<br>ERC 8 Ha Aliya<br>Street POB 9602<br>Haifa, N/A<br>3109601 Israel<br>Rambam - MC -<br>ERC 8 Haaliya<br>St<br>Ethical Committee<br>Haifa, N/A 3525408 Israel          | IRB/IEC<br>Approval of<br>Protocol<br>Amendment # 9  | 21-DEC-2017 |
| Israel | 3475-061 -<br>0364 | Rabin MC<br>32 Jabotinsky<br>Petah Tikva, N/A 4941492 Israel                                                                                                                          | IRB/IEC<br>Approval of<br>Protocol                   | 14-JUN-2015 |
| Israel | 3475-061 -<br>0364 | Rabin MC<br>32 Jabotinsky<br>Petah Tikva, N/A 4941492 Israel                                                                                                                          | IRB/IEC<br>Approval of<br>Protocol<br>Amendment # 11 | 08-JAN-2018 |
| Israel | 3475-061 -<br>0364 | Rabin MC<br>32 Jabotinsky<br>Petah Tikva, N/A 4941492 Israel                                                                                                                          | IRB/IEC<br>Approval of<br>Protocol<br>Amendment # 2  | 22-JUL-2015 |
| Israel | 3475-061 -<br>0364 | Rabin MC<br>32 Jabotinsky<br>Petah Tikva, N/A 4941492 Israel                                                                                                                          | IRB/IEC<br>Approval of<br>Protocol<br>Amendment # 3  | 27-JAN-2016 |
| Israel | 3475-061 -<br>0364 | Rabin MC<br>32 Jabotinsky<br>Petah Tikva, N/A 4941492 Israel                                                                                                                          | IRB/IEC<br>Approval of<br>Protocol<br>Amendment # 4  | 17-JAN-2017 |
| UK     | 3475-061 -         | NRES Committee North West -<br>Greater                                                                                                                                                | Central IRB/IEC<br>Approval                          | 23-JUN-2015 |
| UK     | 3475-061 -         | NRES Committee North West -<br>Greater                                                                                                                                                | Central IRB/IEC<br>Approval                          | 11-OCT-2017 |
| UK     | 3475-061 -         | NRES Committee North West -<br>Greater                                                                                                                                                | Central IRB/IEC<br>Approval                          | 26-MAR-2018 |
| UK     | 3475-061 -         | NRES Committee North West -<br>Greater                                                                                                                                                | Central IRB/IEC<br>Approval                          | 14-JUL-2015 |
| UK     | 3475-061 -         | NRES Committee North West -<br>Greater                                                                                                                                                | Central IRB/IEC<br>Approval                          | 17-AUG-2015 |
| UK     | 3475-061 -         | NRES Committee North West -<br>Greater                                                                                                                                                | Central IRB/IEC<br>Approval                          | 09-MAR-2016 |
| UK     | 3475-061 -         | NRES Committee North West -                                                                                                                                                           | IRB/IEC                                              | 23-JUN-2015 |

|         |            |                                      |                          |             |
|---------|------------|--------------------------------------|--------------------------|-------------|
|         |            | Greater                              | Approval of              |             |
| UK      | 3475-061 - | NRES Committee North West - Greater  | Central IRB/IEC Approval | 23-JUN-2015 |
| UK      | 3475-061 - | NRES Committee North West - Greater  | Central IRB/IEC Approval | 11-OCT-2017 |
| UK      | 3475-061 - | NRES Committee North West - Greater  | Central IRB/IEC Approval | 26-MAR-2018 |
| UK      | 3475-061 - | NRES Committee North West - Greater  | Central IRB/IEC Approval | 14-JUL-2015 |
| UK      | 3475-061 - | NRES Committee North West - Greater  | Central IRB/IEC Approval | 17-AUG-2015 |
| UK      | 3475-061 - | NRES Committee North West - Greater  | Central IRB/IEC Approval | 09-MAR-2016 |
| UK      | 3475-061 - | NRES Committee North West - Greater  | IRB/IEC Approval of      | 23-JUN-2015 |
| Ireland | 3475-061 - | Clinical Research Ethics Committee - | Central IRB/IEC Approval | 21-MAY-2015 |
| Ireland | 3475-061 - | Clinical Research Ethics Committee - | Central IRB/IEC Approval | 12-MAR-2018 |
| Ireland | 3475-061 - | Clinical Research Ethics Committee - | Central IRB/IEC Approval | 21-OCT-2015 |
| Ireland | 3475-061 - | Clinical Research Ethics Committee - | Central IRB/IEC Approval | 03-MAR-2016 |
| Ireland | 3475-061 - | Clinical Research Ethics Committee - | IRB/IEC Approval of      | 21-MAY-2015 |
| Ireland | 3475-061 - | Clinical Research Ethics Committee - | Central IRB/IEC Approval | 21-MAY-2015 |
| Ireland | 3475-061 - | Clinical Research Ethics Committee - | Central IRB/IEC Approval | 12-MAR-2018 |
| Ireland | 3475-061 - | Clinical Research Ethics Committee - | Central IRB/IEC Approval | 21-OCT-2015 |
| Ireland | 3475-061 - | Clinical Research Ethics Committee - | Central IRB/IEC Approval | 03-MAR-2016 |
| Ireland | 3475-061 - | Clinical Research Ethics Committee - | IRB/IEC Approval of      | 21-MAY-2015 |
| Ireland | 3475-061 - | Clinical Research Ethics Committee - | IRB/IEC Approval of      | 22-JUN-2015 |
| UK      | 3475-061 - | NRES Committee North West - Greater  | Central IRB/IEC Approval | 23-JUN-2015 |
| UK      | 3475-061 - | NRES Committee North West - Greater  | Central IRB/IEC Approval | 11-OCT-2017 |
| UK      | 3475-061 - | NRES Committee North West - Greater  | Central IRB/IEC Approval | 26-MAR-2018 |
| UK      | 3475-061 - | NRES Committee North West - Greater  | Central IRB/IEC Approval | 14-JUL-2015 |
| UK      | 3475-061 - | NRES Committee North West - Greater  | Central IRB/IEC Approval | 17-AUG-2015 |
| UK      | 3475-061 - | NRES Committee North West - Greater  | Central IRB/IEC Approval | 09-MAR-2016 |
| UK      | 3475-061 - | NRES Committee North West - Greater  | IRB/IEC Approval of      | 23-JUN-2015 |
| UK      | 3475-061 - | NRES Committee North West - Greater  | Central IRB/IEC Approval | 23-JUN-2015 |
| UK      | 3475-061 - | NRES Committee North West - Greater  | Central IRB/IEC Approval | 11-OCT-2017 |
| UK      | 3475-061 - | NRES Committee North West - Greater  | Central IRB/IEC Approval | 26-MAR-2018 |
| UK      | 3475-061 - | NRES Committee North West - Greater  | Central IRB/IEC Approval | 14-JUL-2015 |

|         |            |                                      |                          |             |
|---------|------------|--------------------------------------|--------------------------|-------------|
| UK      | 3475-061 - | NRES Committee North West - Greater  | Central IRB/IEC Approval | 17-AUG-2015 |
| UK      | 3475-061 - | NRES Committee North West - Greater  | Central IRB/IEC Approval | 09-MAR-2016 |
| UK      | 3475-061 - | NRES Committee North West - Greater  | IRB/IEC Approval of      | 23-JUN-2015 |
| Ireland | 3475-061 - | Clinical Research Ethics Committee - | Central IRB/IEC Approval | 21-MAY-2015 |
| Ireland | 3475-061 - | Clinical Research Ethics Committee - | Central IRB/IEC Approval | 12-MAR-2018 |
| Ireland | 3475-061 - | Clinical Research Ethics Committee - | Central IRB/IEC Approval | 21-OCT-2015 |
| Ireland | 3475-061 - | Clinical Research Ethics Committee - | Central IRB/IEC Approval | 03-MAR-2016 |
| Ireland | 3475-061 - | Clinical Research Ethics Committee - | IRB/IEC Approval of      | 22-APR-2015 |
| Ireland | 3475-061 - | Clinical Research Ethics Committee - | IRB/IEC Approval of      | 20-JUL-2015 |
| Spain   | 3475-061 - |                                      | Central IRB/IEC Approval | 14-APR-2015 |
| Spain   | 3475-061 - |                                      | Central IRB/IEC Approval | 28-JUL-2017 |
| Spain   | 3475-061 - |                                      | Central IRB/IEC Approval | 04-SEP-2015 |
| Spain   | 3475-061 - |                                      | Central IRB/IEC Approval | 16-FEB-2016 |
| Spain   | 3475-061 - |                                      | Central IRB/IEC Approval | 30-APR-2017 |
| Spain   | 3475-061 - |                                      | IRB/IEC Approval of      | 10-APR-2015 |
| Spain   | 3475-061 - |                                      | Central IRB/IEC Approval | 14-APR-2015 |
| Spain   | 3475-061 - |                                      | Central IRB/IEC Approval | 28-JUL-2017 |
| Spain   | 3475-061 - |                                      | Central IRB/IEC Approval | 04-SEP-2015 |
| Spain   | 3475-061 - |                                      | Central IRB/IEC Approval | 16-FEB-2016 |
| Spain   | 3475-061 - |                                      | Central IRB/IEC Approval | 30-APR-2017 |
| Spain   | 3475-061 - |                                      | IRB/IEC Approval of      | 10-APR-2015 |
| Spain   | 3475-061 - |                                      | Central IRB/IEC Approval | 14-APR-2015 |
| Spain   | 3475-061 - |                                      | Central IRB/IEC Approval | 28-JUL-2017 |
| Spain   | 3475-061 - |                                      | Central IRB/IEC Approval | 04-SEP-2015 |
| Spain   | 3475-061 - |                                      | Central IRB/IEC Approval | 16-FEB-2016 |
| Spain   | 3475-061 - |                                      | Central IRB/IEC Approval | 30-APR-2017 |
| Spain   | 3475-061 - |                                      | IRB/IEC Approval of      | 14-APR-2015 |
| Spain   | 3475-061 - |                                      | Central IRB/IEC Approval | 14-APR-2015 |
| Spain   | 3475-061 - |                                      | Central IRB/IEC Approval | 28-JUL-2017 |
| Spain   | 3475-061 - |                                      | Central IRB/IEC Approval | 04-SEP-2015 |

|       |                 |                                                                                                                                              |                                                     |             |
|-------|-----------------|----------------------------------------------------------------------------------------------------------------------------------------------|-----------------------------------------------------|-------------|
|       |                 |                                                                                                                                              | Approval                                            |             |
| Spain | 3475-061 -      |                                                                                                                                              | Central IRB/IEC Approval                            | 16-FEB-2016 |
| Spain | 3475-061 -      |                                                                                                                                              | Central IRB/IEC Approval                            | 30-APR-2017 |
| Spain | 3475-061 -      |                                                                                                                                              | IRB/IEC Approval of                                 | 30-APR-2015 |
| Spain | 3475-061 - 0388 | Hospital Universitario Gregorio Marañon<br>C Doctor Esquerdo 46<br>Madrid, Madrid 28007                                                      | Central IRB/IEC Approval of Protocol                | 14-APR-2015 |
| Spain | 3475-061 - 0388 | Hospital Universitario Gregorio Marañon<br>C Doctor Esquerdo 46<br>Madrid, Madrid 28007                                                      | Central IRB/IEC Approval of Protocol Amendment # 11 | 28-JUL-2017 |
| Spain | 3475-061 - 0388 | Hospital Universitario Gregorio Marañon<br>C Doctor Esquerdo 46<br>Madrid, Madrid 28007                                                      | Central IRB/IEC Approval of Protocol Amendment # 2  | 04-SEP-2015 |
| Spain | 3475-061 - 0388 | Hospital Universitario Gregorio Marañon<br>C Doctor Esquerdo 46<br>Madrid, Madrid 28007                                                      | Central IRB/IEC Approval of Protocol Amendment # 5  | 16-FEB-2016 |
| Spain | 3475-061 - 0388 | Hospital Universitario Gregorio Marañon<br>C Doctor Esquerdo 46<br>Madrid, Madrid 28007                                                      | Central IRB/IEC Approval of Protocol Amendment # 9  | 30-APR-2017 |
| Spain | 3475-061 - 0388 | Hospital Universitario Gregorio Marañon<br>C Doctor Esquerdo 46<br>Madrid, Madrid 28007                                                      | IRB/IEC Approval of Protocol                        | 15-APR-2015 |
| Spain | 3475-061 - 0389 | IFIMAV Fun.Marques de Valdecilla. CEIC de Cantabria<br>Avda. de Valdecilla, 25<br>Edificio IFIMAV 3ª<br>Planta<br>Santander, Cantabria 39008 | Central IRB/IEC Approval of Protocol                | 14-APR-2015 |
| Spain | 3475-061 - 0389 | IFIMAV Fun.Marques de Valdecilla. CEIC de Cantabria<br>Avda. de Valdecilla, 25<br>Edificio IFIMAV 3ª<br>Planta<br>Santander, Cantabria 39008 | Central IRB/IEC Approval of Protocol Amendment # 11 | 28-JUL-2017 |
| Spain | 3475-061 - 0389 | IFIMAV Fun.Marques de Valdecilla. CEIC de Cantabria<br>Avda. de Valdecilla, 25<br>Edificio IFIMAV 3ª Planta<br>Santander, Cantabria 39008    | Central IRB/IEC Approval of Protocol Amendment # 2  | 04-SEP-2015 |
| Spain | 3475-061 - 0389 | IFIMAV Fun.Marques de Valdecilla.<br>CEIC de Cantabria<br>Avda. de Valdecilla, 25<br>Edificio IFIMAV 3ª Planta<br>Santander, Cantabria 39008 | Central IRB/IEC Approval of Protocol Amendment # 5  | 16-FEB-2016 |
| Spain | 3475-061 - 0389 | IFIMAV Fun.Marques de Valdecilla. CEIC de Cantabria<br>Avda. de Valdecilla, 25<br>Edificio IFIMAV 3ª<br>Planta                               | Central IRB/IEC Approval of Protocol Amendment # 9  | 30-APR-2017 |

|        |                 |                                                                                                                                                                                                                           |                                                              |             |
|--------|-----------------|---------------------------------------------------------------------------------------------------------------------------------------------------------------------------------------------------------------------------|--------------------------------------------------------------|-------------|
|        |                 | Santander, Cantabria 39008                                                                                                                                                                                                |                                                              |             |
| Spain  | 3475-061 - 0389 | IFIMAV Fun.Marques de Valdecilla. CEIC de Cantabria<br>Avda. de Valdecilla, 25<br>Edificio IFIMAV 3ª<br>Planta<br>Santander, Cantabria 39008                                                                              | IRB/IEC<br>Approval of<br>Protocol                           | 14-APR-2015 |
| Spain  | 3475-061 -      |                                                                                                                                                                                                                           | Central IRB/IEC<br>Approval                                  | 14-APR-2015 |
| Spain  | 3475-061 -      |                                                                                                                                                                                                                           | Central IRB/IEC<br>Approval                                  | 28-JUL-2017 |
| Spain  | 3475-061 -      |                                                                                                                                                                                                                           | Central IRB/IEC<br>Approval                                  | 04-SEP-2015 |
| Spain  | 3475-061 -      |                                                                                                                                                                                                                           | Central IRB/IEC<br>Approval                                  | 16-FEB-2016 |
| Spain  | 3475-061 -      |                                                                                                                                                                                                                           | Central IRB/IEC<br>Approval                                  | 30-APR-2017 |
| Spain  | 3475-061 -      |                                                                                                                                                                                                                           | IRB/IEC<br>Approval of                                       | 15-APR-2015 |
| Spain  | 3475-061 -      |                                                                                                                                                                                                                           | Central IRB/IEC<br>Approval                                  | 14-APR-2015 |
| Spain  | 3475-061 -      |                                                                                                                                                                                                                           | Central IRB/IEC<br>Approval                                  | 28-JUL-2017 |
| Spain  | 3475-061 -      |                                                                                                                                                                                                                           | Central IRB/IEC<br>Approval                                  | 04-SEP-2015 |
| Spain  | 3475-061 -      |                                                                                                                                                                                                                           | Central IRB/IEC<br>Approval                                  | 16-FEB-2016 |
| Spain  | 3475-061 -      |                                                                                                                                                                                                                           | Central IRB/IEC<br>Approval                                  | 30-APR-2017 |
| Spain  | 3475-061 -      |                                                                                                                                                                                                                           | IRB/IEC<br>Approval of                                       | 15-APR-2015 |
| Poland | 3475-061 - 0400 | Niezależna Komisja Bioetyczna ds.<br>Badan Naukowych przy GUM<br>ul. Sklodowsk-Curie 3a<br>Gdansk, Pomorskie 80-<br>210 Poland<br>Niezależna Komisja Bioetyczna ds.<br>Badan Naukowych przy GUM<br>ul. Sklodowsk-Curie 3a | Central IRB/IEC<br>Approval of<br>Protocol                   | 18-SEP-2015 |
| Poland | 3475-061 - 0400 | Niezależna Komisja Bioetyczna ds.<br>Badan Naukowych przy GUM<br>ul. Sklodowsk-Curie 3a<br>Gdansk, Pomorskie 80-<br>210 Poland<br>Niezależna Komisja Bioetyczna ds.<br>Badan Naukowych przy GUM<br>ul. Sklodowsk-Curie 3a | Central IRB/IEC<br>Approval of<br>Protocol<br>Amendment # 11 | 14-FEB-2018 |
| Poland | 3475-061 - 0400 | Niezależna Komisja Bioetyczna ds.<br>Badan Naukowych przy GUM<br>ul. Sklodowsk-Curie 3a<br>Gdansk, Pomorskie 80-<br>210 Poland<br>Niezależna Komisja Bioetyczna ds.<br>Badan Naukowych przy GUM<br>ul. Sklodowsk-Curie 3a | Central IRB/IEC<br>Approval of<br>Protocol<br>Amendment # 2  | 18-SEP-2015 |
| Poland | 3475-061 - 0400 | Niezależna Komisja Bioetyczna ds.<br>Badan Naukowych przy GUM<br>ul. Sklodowsk-Curie 3a<br>Gdansk, Pomorskie 80-                                                                                                          | Central IRB/IEC<br>Approval of<br>Protocol<br>Amendment # 5  | 14-JAN-2016 |

|        |                    |                                                                                                                                                                                                                           |                                                              |             |
|--------|--------------------|---------------------------------------------------------------------------------------------------------------------------------------------------------------------------------------------------------------------------|--------------------------------------------------------------|-------------|
|        |                    | 210 Poland<br>Niezależna Komisja Bioetyczna ds.<br>Badan Naukowych przy GUM<br>ul. Sklodowsk-Curie 3a                                                                                                                     |                                                              |             |
| Poland | 3475-061 -<br>0400 | Niezależna Komisja Bioetyczna ds.<br>Badan Naukowych przy GUM<br>ul. Sklodowsk-Curie 3a<br>Gdansk, Pomorskie 80-<br>210 Poland<br>Niezależna Komisja Bioetyczna ds.<br>Badan Naukowych przy GUM<br>ul. Sklodowsk-Curie 3a | Central IRB/IEC<br>Approval of<br>Protocol<br>Amendment # 7  | 18-JAN-2017 |
| Poland | 3475-061 -<br>0400 | Niezależna Komisja Bioetyczna ds.<br>Badan Naukowych przy GUM<br>ul. Sklodowsk-Curie 3a<br>Gdansk, Pomorskie 80-<br>210 Poland<br>Niezależna Komisja Bioetyczna ds.<br>Badan Naukowych przy GUM<br>ul. Sklodowsk-Curie 3a | Central IRB/IEC<br>Approval of<br>Protocol<br>Amendment # 9  | 11-SEP-2017 |
| Poland | 3475-061 -<br>0400 | Niezależna Komisja Bioetyczna ds.<br>Badan Naukowych przy GUM<br>ul. Sklodowsk-Curie 3a<br>Gdansk, Pomorskie 80-<br>210 Poland<br>Niezależna Komisja Bioetyczna ds.<br>Badan Naukowych przy GUM<br>ul. Sklodowsk-Curie 3a | IRB/IEC<br>Approval of<br>Protocol                           | 18-SEP-2015 |
| Poland | 3475-061 -<br>0401 | Niezależna Komisja Bioetyczna ds.<br>Badan Naukowych przy GUM<br>ul. Sklodowsk-Curie 3a<br>Gdansk, Pomorskie 80-<br>210 Poland<br>Niezależna Komisja Bioetyczna ds.<br>Badan Naukowych przy GUM<br>ul. Sklodowsk-Curie 3a | Central IRB/IEC<br>Approval of<br>Protocol                   | 18-SEP-2015 |
| Poland | 3475-061 -<br>0401 | Niezależna Komisja Bioetyczna ds.<br>Badan Naukowych przy GUM<br>ul. Sklodowsk-Curie 3a<br>Gdansk, Pomorskie 80-<br>210 Poland<br>Niezależna Komisja Bioetyczna ds.<br>Badan Naukowych przy GUM<br>ul. Sklodowsk-Curie 3a | Central IRB/IEC<br>Approval of<br>Protocol<br>Amendment # 11 | 14-FEB-2018 |
| Poland | 3475-061 -<br>0401 | Niezależna Komisja Bioetyczna ds.<br>Badan Naukowych przy GUM<br>ul. Sklodowsk-Curie 3a<br>Gdansk, Pomorskie 80-<br>210 Poland<br>Niezależna Komisja Bioetyczna ds.<br>Badan Naukowych przy GUM<br>ul. Sklodowsk-Curie 3a | Central IRB/IEC<br>Approval of<br>Protocol<br>Amendment # 2  | 18-SEP-2015 |
| Poland | 3475-061 -<br>0401 | Niezależna Komisja Bioetyczna ds.<br>Badan Naukowych przy GUM<br>ul. Sklodowsk-Curie 3a<br>Gdansk, Pomorskie 80-<br>210 Poland<br>Niezależna Komisja Bioetyczna ds.<br>Badan Naukowych przy GUM<br>ul. Sklodowsk-Curie 3a | Central IRB/IEC<br>Approval of<br>Protocol<br>Amendment # 5  | 14-JAN-2016 |



|        |                 |                                                                                                                                                                                                        |                                                     |             |
|--------|-----------------|--------------------------------------------------------------------------------------------------------------------------------------------------------------------------------------------------------|-----------------------------------------------------|-------------|
| Poland | 3475-061 - 0401 | Niezależna Komisja Bioetyczna ds. Badan Naukowych przy GUM ul. Sklodowsk-Curie 3a Gdansk, Pomorskie 80-210 Poland<br>Niezależna Komisja Bioetyczna ds. Badan Naukowych przy GUM ul. Sklodowsk-Curie 3a | Central IRB/IEC Approval of Protocol Amendment # 7  | 18-JAN-2017 |
| Poland | 3475-061 - 0401 | Niezależna Komisja Bioetyczna ds. Badan Naukowych przy GUM ul. Sklodowsk-Curie 3a Gdansk, Pomorskie 80-210 Poland<br>Niezależna Komisja Bioetyczna ds. Badan Naukowych przy GUM ul. Sklodowsk-Curie 3a | Central IRB/IEC Approval of Protocol Amendment # 9  | 11-SEP-2017 |
| Poland | 3475-061 - 0401 | Niezależna Komisja Bioetyczna ds. Badan Naukowych przy GUM ul. Sklodowsk-Curie 3a Gdansk, Pomorskie 80-210 Poland<br>Niezależna Komisja Bioetyczna ds. Badan Naukowych przy GUM ul. Sklodowsk-Curie 3a | IRB/IEC Approval of Protocol                        | 28-OCT-2015 |
| Poland | 3475-061 - 0402 | Niezależna Komisja Bioetyczna ds. Badan Naukowych przy GUM ul. Sklodowsk-Curie 3a Gdansk, Pomorskie 80-210                                                                                             | Central IRB/IEC Approval of Protocol                | 18-SEP-2015 |
| Poland | 3475-061 - 0402 | Niezależna Komisja Bioetyczna ds. Badan Naukowych przy GUM ul. Sklodowsk-Curie 3a Gdansk, Pomorskie 80-210                                                                                             | Central IRB/IEC Approval of Protocol Amendment # 11 | 14-FEB-2018 |
| Poland | 3475-061 - 0402 | Niezależna Komisja Bioetyczna ds. Badan Naukowych przy GUM ul. Sklodowsk-Curie 3a Gdansk, Pomorskie 80-210                                                                                             | Central IRB/IEC Approval of Protocol Amendment # 2  | 18-SEP-2015 |
| Poland | 3475-061 - 0402 | Niezależna Komisja Bioetyczna ds. Badan Naukowych przy GUM ul. Sklodowsk-Curie 3a Gdansk, Pomorskie 80-210                                                                                             | Central IRB/IEC Approval of Protocol Amendment # 5  | 14-JAN-2016 |
| Poland | 3475-061 - 0402 | Niezależna Komisja Bioetyczna ds. Badan Naukowych przy GUM ul. Sklodowsk-Curie 3a Gdansk, Pomorskie 80-210                                                                                             | Central IRB/IEC Approval of Protocol Amendment # 7  | 18-JAN-2017 |
| Poland | 3475-061 - 0402 | Niezależna Komisja Bioetyczna ds. Badan Naukowych przy GUM ul. Sklodowsk-Curie 3a Gdansk, Pomorskie 80-210                                                                                             | Central IRB/IEC Approval of Protocol Amendment # 9  | 11-SEP-2017 |
| Poland | 3475-061 - 0402 | Niezależna Komisja Bioetyczna ds. Badan Naukowych przy GUM ul. Sklodowsk-Curie 3a Gdansk, Pomorskie 80-210                                                                                             | IRB/IEC Approval of Protocol                        | 18-SEP-2015 |
| Poland | 3475-061 - 0404 | Niezależna Komisja Bioetyczna ds. Badan Naukowych przy GUM ul. Sklodowsk-Curie 3a Gdansk, Pomorskie 80-210 Poland<br>Niezależna Komisja Bioetyczna ds. Badan Naukowych przy GUM ul. Sklodowsk-Curie 3a | Central IRB/IEC Approval of Protocol                | 18-SEP-2015 |

|        |                 |                                                                                                                                                                                                        |                                                     |             |
|--------|-----------------|--------------------------------------------------------------------------------------------------------------------------------------------------------------------------------------------------------|-----------------------------------------------------|-------------|
| Poland | 3475-061 - 0404 | Niezależna Komisja Bioetyczna ds. Badan Naukowych przy GUM ul. Sklodowsk-Curie 3a Gdansk, Pomorskie 80-210 Poland<br>Niezależna Komisja Bioetyczna ds. Badan Naukowych przy GUM ul. Sklodowsk-Curie 3a | Central IRB/IEC Approval of Protocol Amendment # 11 | 14-FEB-2018 |
| Poland | 3475-061 - 0404 | Niezależna Komisja Bioetyczna ds. Badan Naukowych przy GUM ul. Sklodowsk-Curie 3a Gdansk, Pomorskie 80-210 Poland<br>Niezależna Komisja Bioetyczna ds. Badan Naukowych przy GUM ul. Sklodowsk-Curie 3a | Central IRB/IEC Approval of Protocol Amendment # 2  | 18-SEP-2015 |
| Poland | 3475-061 - 0404 | Niezależna Komisja Bioetyczna ds. Badan Naukowych przy GUM ul. Sklodowsk-Curie 3a Gdansk, Pomorskie 80-210 Poland<br>Niezależna Komisja Bioetyczna ds. Badan Naukowych przy GUM ul. Sklodowsk-Curie 3a | Central IRB/IEC Approval of Protocol Amendment # 5  | 14-JAN-2016 |
| Poland | 3475-061 - 0404 | Niezależna Komisja Bioetyczna ds. Badan Naukowych przy GUM ul. Sklodowsk-Curie 3a Gdansk, Pomorskie 80-210 Poland<br>Niezależna Komisja Bioetyczna ds. Badan Naukowych przy GUM ul. Sklodowsk-Curie 3a | Central IRB/IEC Approval of Protocol Amendment # 7  | 18-JAN-2017 |
| Poland | 3475-061 - 0404 | Niezależna Komisja Bioetyczna ds. Badan Naukowych przy GUM ul. Sklodowsk-Curie 3a Gdansk, Pomorskie 80-210 Poland<br>Niezależna Komisja Bioetyczna ds. Badan Naukowych przy GUM ul. Sklodowsk-Curie 3a | Central IRB/IEC Approval of Protocol Amendment # 9  | 11-SEP-2017 |
| Poland | 3475-061 - 0404 | Niezależna Komisja Bioetyczna ds. Badan Naukowych przy GUM ul. Sklodowsk-Curie 3a Gdansk, Pomorskie 80-210 Poland<br>Niezależna Komisja Bioetyczna ds. Badan Naukowych przy GUM ul. Sklodowsk-Curie 3a | IRB/IEC Approval of Protocol                        | 18-SEP-2015 |
| Norway | 3475-061 - 0416 | REK soer-oest C Gullhaugveien 1-3 Blindern Oslo, Oslo 0484 Norway                                                                                                                                      | Central IRB/IEC Approval of Protocol                | 22-JUN-2015 |
| Norway | 3475-061 - 0416 | REK soer-oest C Gullhaugveien 1-3 Blindern Oslo, Oslo 0484 Norway                                                                                                                                      | Central IRB/IEC Approval of Protocol Amendment # 11 | 02-MAR-2018 |

|        |                 |                                                                                  |                                                              |             |
|--------|-----------------|----------------------------------------------------------------------------------|--------------------------------------------------------------|-------------|
| Norway | 3475-061 - 0416 | REK soer-oest<br>C<br>Gullhaugveien<br>1-3 Blindern<br>Oslo, Oslo 0484<br>Norway | Central IRB/IEC<br>Approval of<br>Protocol<br>Amendment # 13 | 23-JUN-2020 |
| Norway | 3475-061 - 0416 | REK soer-oest<br>C<br>Gullhaugveien<br>1-3 Blindern<br>Oslo, Oslo 0484<br>Norway | Central IRB/IEC<br>Approval of<br>Protocol<br>Amendment # 2  | 11-SEP-2015 |
| Norway | 3475-061 - 0416 | REK soer-oest<br>C<br>Gullhaugveien<br>1-3 Blindern<br>Oslo, Oslo 0484<br>Norway | Central IRB/IEC<br>Approval of<br>Protocol<br>Amendment # 5  | 19-FEB-2016 |
| Norway | 3475-061 - 0416 | REK soer-oest<br>C<br>Gullhaugveien<br>1-3 Blindern<br>Oslo, Oslo 0484<br>Norway | Central IRB/IEC<br>Approval of<br>Protocol<br>Amendment # 7  | 30-NOV-2016 |
| Norway | 3475-061 - 0416 | REK soer-oest<br>C<br>Gullhaugveien<br>1-3 Blindern<br>Oslo, Oslo 0484<br>Norway | Central IRB/IEC<br>Approval of<br>Protocol<br>Amendment # 9  | 11-DEC-2017 |
| Norway | 3475-061 - 0416 | REK soer-oest<br>C<br>Gullhaugveien<br>1-3 Blindern<br>Oslo, Oslo 0484<br>Norway | IRB/IEC<br>Approval of<br>Protocol                           | 22-JUN-2015 |
| Norway | 3475-061 - 0417 | REK soer-oest<br>C<br>Gullhaugveien<br>1-3 Blindern<br>Oslo, Oslo 0484<br>Norway | Central IRB/IEC<br>Approval of<br>Protocol                   | 22-JUN-2015 |
| Norway | 3475-061 - 0417 | REK soer-oest<br>C<br>Gullhaugveien<br>1-3 Blindern<br>Oslo, Oslo 0484<br>Norway | Central IRB/IEC<br>Approval of<br>Protocol<br>Amendment # 11 | 02-MAR-2018 |
| Norway | 3475-061 - 0417 | REK soer-oest<br>C<br>Gullhaugveien<br>1-3 Blindern<br>Oslo, Oslo 0484<br>Norway | Central IRB/IEC<br>Approval of<br>Protocol<br>Amendment # 13 | 23-JUN-2020 |
| Norway | 3475-061 - 0417 | REK soer-oest<br>C<br>Gullhaugveien<br>1-3 Blindern<br>Oslo, Oslo 0484<br>Norway | Central IRB/IEC<br>Approval of<br>Protocol<br>Amendment # 2  | 11-SEP-2015 |

|        |                 |                                                                                                                   |                                                              |             |
|--------|-----------------|-------------------------------------------------------------------------------------------------------------------|--------------------------------------------------------------|-------------|
| Norway | 3475-061 - 0417 | REK soer-oest<br>C<br>Gullhaugveien<br>1-3 Blindern<br>Oslo, Oslo 0484<br>Norway                                  | Central IRB/IEC<br>Approval of<br>Protocol<br>Amendment # 5  | 19-FEB-2016 |
| Norway | 3475-061 - 0417 | REK soer-oest<br>C<br>Gullhaugveien<br>1-3 Blindern<br>Oslo, Oslo 0484<br>Norway                                  | Central IRB/IEC<br>Approval of<br>Protocol<br>Amendment # 7  | 30-NOV-2016 |
| Norway | 3475-061 - 0417 | REK soer-oest<br>C<br>Gullhaugveien<br>1-3 Blindern<br>Oslo, Oslo 0484<br>Norway                                  | Central IRB/IEC<br>Approval of<br>Protocol<br>Amendment # 9  | 11-DEC-2017 |
| Norway | 3475-061 - 0417 | REK soer-oest<br>C<br>Gullhaugveien<br>1-3 Blindern<br>Oslo, Oslo 0484<br>Norway                                  | IRB/IEC<br>Approval of<br>Protocol                           | 22-JUN-2015 |
| Italy  | 3475-061 - 0464 | A.O.U. Santa Maria della<br>Misericordia di Udine<br>Via<br>Colugna 50<br>Comitato<br>Etico<br>Udine, Udine 33100 | Central IRB/IEC<br>Approval of<br>Protocol                   | 22-APR-2015 |
| Italy  | 3475-061 - 0464 | A.O.U. Santa Maria della<br>Misericordia di Udine<br>Via<br>Colugna 50<br>Comitato<br>Etico<br>Udine, Udine 33100 | Central IRB/IEC<br>Approval of<br>Protocol<br>Amendment # 11 | 28-MAR-2018 |
| Italy  | 3475-061 - 0464 | A.O.U. Santa Maria della<br>Misericordia di Udine<br>Via<br>Colugna 50<br>Comitato<br>Etico<br>Udine, Udine 33100 | Central IRB/IEC<br>Approval of<br>Protocol<br>Amendment # 13 | 28-MAY-2020 |
| Italy  | 3475-061 - 0464 | A.O.U. Santa Maria della<br>Misericordia di Udine<br>Via<br>Colugna 50<br>Comitato<br>Etico<br>Udine, Udine 33100 | Central IRB/IEC<br>Approval of<br>Protocol<br>Amendment # 2  | 24-AUG-2015 |
| Italy  | 3475-061 - 0464 | A.O.U. Santa Maria della<br>Misericordia di Udine<br>Via<br>Colugna 50<br>Comitato<br>Etico<br>Udine, Udine 33100 | Central IRB/IEC<br>Approval of<br>Protocol<br>Amendment # 5  | 16-MAR-2016 |
| Italy  | 3475-061 -      | A.O.U. Santa Maria della                                                                                          | Central IRB/IEC                                              | 29-DEC-2016 |

|       |                    |                                                                                                                                                                  |                                                             |             |
|-------|--------------------|------------------------------------------------------------------------------------------------------------------------------------------------------------------|-------------------------------------------------------------|-------------|
|       | 0464               | Misericordia di Udine<br>Via Colugna 50<br>Comitato Etico Udine, Udine<br>33100                                                                                  | Approval of<br>Protocol<br>Amendment # 7                    |             |
| Italy | 3475-061 -<br>0464 | A.O.U. Santa Maria della<br>Misericordia<br>di Udine<br>Via Colugna 50 Comitato Etico<br>Udine, Udine 33100                                                      | Central IRB/IEC<br>Approval<br>of Protocol<br>Amendment # 9 | 23-NOV-2017 |
| Italy | 3475-061 -<br>0464 | A.O.U. Santa Maria della<br>Misericordia di Udine<br>Via Colugna 50<br>Comitato Etico Udine, Udine<br>33100                                                      | IRB/IEC<br>Approval of<br>Protocol                          | 08-SEP-2015 |
| Italy | 3475-061 -<br>0464 | A.O.U. Santa Maria della<br>Misericordia<br>di Udine<br>Via Colugna 50 Comitato Etico<br>Udine, Udine 33100                                                      | IRB/IEC<br>Approval of<br>Protocol<br>Amendment # 11        | 22-MAY-2018 |
| Italy | 3475-061 -<br>0464 | A.O.U. Santa Maria della<br>Misericordia di Udine<br>Via<br>Colugna 50<br>Comitato<br>Etico<br>Udine, Udine 33100                                                | IRB/IEC<br>Approval of<br>Protocol<br>Amendment # 13        | 20-OCT-2020 |
| Italy | 3475-061 -<br>0464 | A.O.U. Santa Maria della<br>Misericordia di Udine<br>Via<br>Colugna 50<br>Comitato<br>Etico<br>Udine, Udine 33100                                                | IRB/IEC<br>Approval of<br>Protocol<br>Amendment # 2         | 27-JAN-2016 |
| Italy | 3475-061 -<br>0464 | A.O.U. Santa Maria della<br>Misericordia di Udine<br>Via<br>Colugna 50<br>Comitato<br>Etico<br>Udine, Udine 33100                                                | IRB/IEC<br>Approval of<br>Protocol<br>Amendment # 5         | 07-JUN-2016 |
| Italy | 3475-061 -<br>0464 | A.O.U. Santa Maria della<br>Misericordia di Udine<br>Via<br>Colugna 50<br>Comitato<br>Etico<br>Udine, Udine 33100                                                | IRB/IEC<br>Approval of<br>Protocol<br>Amendment # 7         | 24-JAN-2017 |
| Italy | 3475-061 -<br>0464 | A.O.U. Santa Maria della<br>Misericordia di Udine<br>Via Colugna 50<br>Comitato Etico Udine, Udine<br>33100                                                      | IRB/IEC<br>Approval of<br>Protocol<br>Amendment # 9         | 30-JAN-2018 |
| Italy | 3475-061 -<br>0465 | Comitato Etico per la<br>Sperimentazione<br>Clin.dei Medicinali dell<br>Azienda Ospedaliero-<br>Univers.<br>Via Roma 67<br>U.O. Farmaceutica Pisa, Pisa<br>56126 | Central IRB/IEC<br>Approval<br>of Protocol                  | 22-APR-2015 |

|       |                 |                                                                                                                                            |                                                     |             |
|-------|-----------------|--------------------------------------------------------------------------------------------------------------------------------------------|-----------------------------------------------------|-------------|
| Italy | 3475-061 - 0465 | Comitato Etico per la Sperimentazione Clin.dei Medicinali dell Azienda Ospedaliero-Univers. Via Roma 67 U.O. Farmaceutica Pisa, Pisa 56126 | Central IRB/IEC Approval of Protocol Amendment # 11 | 28-MAR-2018 |
| Italy | 3475-061 - 0465 | Comitato Etico per la Sperimentazione Clin.dei Medicinali dell Azienda Ospedaliero-Univers. Via Roma 67 U.O. Farmaceutica Pisa, Pisa 56126 | Central IRB/IEC Approval of Protocol Amendment # 13 | 28-MAY-2020 |
| Italy | 3475-061 - 0465 | Comitato Etico per la Sperimentazione Clin.dei Medicinali dell Azienda Ospedaliero-Univers. Via Roma 67 U.O. Farmaceutica Pisa, Pisa 56126 | Central IRB/IEC Approval of Protocol Amendment # 2  | 24-AUG-2015 |
| Italy | 3475-061 - 0465 | Comitato Etico per la Sperimentazione Clin.dei Medicinali dell Azienda Ospedaliero-Univers. Via Roma 67 U.O. Farmaceutica Pisa, Pisa 56126 | Central IRB/IEC Approval of Protocol Amendment # 5  | 16-MAR-2016 |
| Italy | 3475-061 - 0465 | Comitato Etico per la Sperimentazione Clin.dei Medicinali dell Azienda Ospedaliero-Univers. Via Roma 67 U.O. Farmaceutica Pisa, Pisa 56126 | Central IRB/IEC Approval of Protocol Amendment # 7  | 29-DEC-2016 |
| Italy | 3475-061 - 0465 | Comitato Etico per la Sperimentazione Clin.dei Medicinali dell Azienda Ospedaliero-Univers. Via Roma 67 U.O. Farmaceutica Pisa, Pisa 56126 | Central IRB/IEC Approval of Protocol Amendment # 9  | 23-NOV-2017 |
| Italy | 3475-061 - 0465 | Comitato Etico per la Sperimentazione Clin.dei Medicinali dell Azienda Ospedaliero-Univers. Via Roma 67 U.O. Farmaceutica Pisa, Pisa 56126 | IRB/IEC Approval of Protocol                        | 28-MAY-2015 |
| Italy | 3475-061 - 0465 | Comitato Etico per la Sperimentazione Clin.dei Medicinali dell Azienda Ospedaliero-Univers. Via Roma 67                                    | IRB/IEC Approval of Protocol Amendment # 11         | 24-MAY-2018 |

|       |                    |                                                                                                                                                                  |                                                              |             |
|-------|--------------------|------------------------------------------------------------------------------------------------------------------------------------------------------------------|--------------------------------------------------------------|-------------|
|       |                    | U.O. Farmaceutica Pisa, Pisa<br>56126                                                                                                                            |                                                              |             |
| Italy | 3475-061 -<br>0465 | Comitato Etico per la<br>Sperimentazione<br>Clin.dei Medicinali dell<br>Azienda Ospedaliero-<br>Univers.<br>Via Roma 67<br>U.O. Farmaceutica Pisa, Pisa<br>56126 | IRB/IEC<br>Approval of<br>Protocol<br>Amendment # 13         | 08-OCT-2020 |
| Italy | 3475-061 -<br>0465 | Comitato Etico per la<br>Sperimentazione<br>Clin.dei Medicinali dell<br>Azienda Ospedaliero-<br>Univers.<br>Via Roma 67<br>U.O. Farmaceutica Pisa, Pisa<br>56126 | IRB/IEC<br>Approval of<br>Protocol<br>Amendment # 2          | 10-SEP-2015 |
| Italy | 3475-061 -<br>0465 | Comitato Etico per la<br>Sperimentazione<br>Clin.dei Medicinali dell<br>Azienda Ospedaliero-<br>Univers.<br>Via Roma 67<br>U.O. Farmaceutica Pisa, Pisa<br>56126 | IRB/IEC<br>Approval of<br>Protocol<br>Amendment # 5          | 07-APR-2016 |
| Italy | 3475-061 -<br>0465 | Comitato Etico per la<br>Sperimentazione<br>Clin.dei Medicinali dell<br>Azienda Ospedaliero-<br>Univers.<br>Via Roma 67<br>U.O. Farmaceutica Pisa, Pisa<br>56126 | IRB/IEC<br>Approval of<br>Protocol<br>Amendment # 7          | 16-FEB-2017 |
| Italy | 3475-061 -<br>0465 | Comitato Etico per la<br>Sperimentazione<br>Clin.dei Medicinali dell<br>Azienda Ospedaliero-<br>Univers.<br>Via Roma 67<br>U.O. Farmaceutica Pisa, Pisa<br>56126 | IRB/IEC<br>Approval of<br>Protocol<br>Amendment # 9          | 01-MAR-2018 |
| Italy | 3475-061 -<br>0466 | Comitato Etico dell'IRCCS<br>Ospedale<br>Casa Sollievo della<br>Sofferenza Viale Cappuccini<br>Comitato Etico<br>San Giovanni Rotondo (FG),<br>Foggia            | Central IRB/IEC<br>Approval<br>of Protocol                   | 22-APR-2015 |
| Italy | 3475-061 -<br>0466 | Comitato Etico dell'IRCCS<br>Ospedale Casa Sollievo della<br>Sofferenza<br>Viale<br>Cappuccini<br>Comitato Etico<br>San Giovanni Rotondo (FG),<br>Foggia         | Central IRB/IEC<br>Approval of<br>Protocol<br>Amendment # 11 | 28-MAR-2018 |
| Italy | 3475-061 -<br>0466 | Comitato Etico dell'IRCCS<br>Ospedale Casa Sollievo della<br>Sofferenza                                                                                          | Central IRB/IEC<br>Approval of<br>Protocol                   | 28-MAY-2020 |



|       |                    |                                                                                                                                                          |                                                             |             |
|-------|--------------------|----------------------------------------------------------------------------------------------------------------------------------------------------------|-------------------------------------------------------------|-------------|
|       |                    | Viale Cappuccini<br>Comitato Etico<br>San Giovanni Rotondo (FG),<br>Foggia                                                                               | Amendment # 13                                              |             |
| Italy | 3475-061 -<br>0466 | Comitato Etico dell'IRCCS<br>Ospedale Casa Sollievo della<br>Sofferenza<br>Viale<br>Cappuccini<br>Comitato Etico<br>San Giovanni Rotondo (FG),<br>Foggia | Central IRB/IEC<br>Approval of<br>Protocol<br>Amendment # 2 | 24-AUG-2015 |
| Italy | 3475-061 -<br>0466 | Comitato Etico dell'IRCCS<br>Ospedale Casa Sollievo della<br>Sofferenza<br>Viale<br>Cappuccini<br>Comitato Etico<br>San Giovanni Rotondo (FG),<br>Foggia | Central IRB/IEC<br>Approval of<br>Protocol<br>Amendment # 5 | 16-MAR-2016 |
| Italy | 3475-061 -<br>0466 | Comitato Etico dell'IRCCS<br>Ospedale Casa Sollievo della<br>Sofferenza<br>Viale<br>Cappuccini<br>Comitato Etico<br>San Giovanni Rotondo (FG),<br>Foggia | Central IRB/IEC<br>Approval of<br>Protocol<br>Amendment # 7 | 29-DEC-2016 |
| Italy | 3475-061 -<br>0466 | Comitato Etico dell'IRCCS<br>Ospedale Casa Sollievo della<br>Sofferenza<br>Viale<br>Cappuccini<br>Comitato Etico<br>San Giovanni Rotondo (FG),<br>Foggia | Central IRB/IEC<br>Approval of<br>Protocol<br>Amendment # 9 | 23-NOV-2017 |
| Italy | 3475-061 -<br>0466 | Comitato Etico dell'IRCCS<br>Ospedale Casa Sollievo della<br>Sofferenza<br>Viale<br>Cappuccini<br>Comitato Etico<br>San Giovanni Rotondo (FG),<br>Foggia | IRB/IEC<br>Approval of<br>Protocol                          | 03-APR-2015 |
| Italy | 3475-061 -<br>0466 | Comitato Etico dell'IRCCS<br>Ospedale Casa Sollievo della<br>Sofferenza<br>Viale<br>Cappuccini<br>Comitato Etico<br>San Giovanni Rotondo (FG),<br>Foggia | IRB/IEC<br>Approval of<br>Protocol<br>Amendment # 2         | 30-SEP-2015 |
| Italy | 3475-061 -<br>0466 | Comitato Etico dell'IRCCS<br>Ospedale Casa Sollievo della<br>Sofferenza<br>Viale<br>Cappuccini<br>Comitato Etico<br>San Giovanni Rotondo (FG),           | IRB/IEC<br>Approval of<br>Protocol<br>Amendment # 5         | 21-MAR-2016 |

|       |                 |                                                                                                                                     |                                                     |             |
|-------|-----------------|-------------------------------------------------------------------------------------------------------------------------------------|-----------------------------------------------------|-------------|
|       |                 | Foggia                                                                                                                              |                                                     |             |
| Italy | 3475-061 - 0466 | Comitato Etico dell'IRCCS Ospedale Casa Sollievo della Sofferenza Viale Cappuccini Comitato Etico San Giovanni Rotondo (FG), Foggia | IRB/IEC Approval of Protocol Amendment # 7          | 23-JAN-2017 |
| Italy | 3475-061 - 0466 | Comitato Etico dell'IRCCS Ospedale Casa Sollievo della Sofferenza Viale Cappuccini Comitato Etico San Giovanni Rotondo (FG), Foggia | IRB/IEC Approval of Protocol Amendment # 9          | 06-NOV-2017 |
| Italy | 3475-061 - 0468 | Comitato di BioEtica della ASL della Provincia di Bergamo Via Galliccioli, 4 Comitato di BioEtica Bergamo, Bergamo 24121            | Central IRB/IEC Approval of Protocol                | 22-APR-2015 |
| Italy | 3475-061 - 0468 | Comitato di BioEtica della ASL della Provincia di Bergamo Via Galliccioli, 4 Comitato di BioEtica Bergamo, Bergamo 24121            | Central IRB/IEC Approval of Protocol Amendment # 11 | 28-MAR-2018 |
| Italy | 3475-061 - 0468 | Comitato di BioEtica della ASL della Provincia di Bergamo Via Galliccioli, 4 Comitato di BioEtica Bergamo, Bergamo 24121            | Central IRB/IEC Approval of Protocol Amendment # 13 | 28-MAY-2020 |
| Italy | 3475-061 - 0468 | Comitato di BioEtica della ASL della Provincia di Bergamo Via Galliccioli, 4 Comitato di BioEtica Bergamo, Bergamo 24121            | Central IRB/IEC Approval of Protocol Amendment # 2  | 24-AUG-2015 |
| Italy | 3475-061 - 0468 | Comitato di BioEtica della ASL della Provincia di Bergamo Via Galliccioli, 4 Comitato di BioEtica Bergamo, Bergamo 24121            | Central IRB/IEC Approval of Protocol Amendment # 5  | 16-MAR-2016 |
| Italy | 3475-061 - 0468 | Comitato di BioEtica della ASL della Provincia di Bergamo Via Galliccioli, 4 Comitato di BioEtica Bergamo, Bergamo 24121            | Central IRB/IEC Approval of Protocol Amendment # 7  | 29-DEC-2016 |
| Italy | 3475-061 - 0468 | Comitato di BioEtica della ASL della Provincia di Bergamo Via Galliccioli, 4 Comitato di BioEtica Bergamo, Bergamo 24121            | Central IRB/IEC Approval of Protocol Amendment # 9  | 23-NOV-2017 |
| Italy | 3475-061 -      | Comitato di BioEtica della ASL                                                                                                      | IRB/IEC                                             | 26-MAR-2015 |

|       |                    |                                                                                                                                         |                                                              |             |
|-------|--------------------|-----------------------------------------------------------------------------------------------------------------------------------------|--------------------------------------------------------------|-------------|
|       | 0468               | della Provincia di Bergamo<br>Via Galliccioli, 4<br>Comitato di<br>BioEtica<br>Bergamo, Bergamo 24121                                   | Approval of<br>Protocol                                      |             |
| Italy | 3475-061 -<br>0468 | Comitato di BioEtica della ASL<br>della Provincia di Bergamo<br>Via Galliccioli, 4<br>Comitato di<br>BioEtica<br>Bergamo, Bergamo 24121 | IRB/IEC<br>Approval of<br>Protocol<br>Amendment # 11         | 18-APR-2018 |
| Italy | 3475-061 -<br>0468 | Comitato di BioEtica della ASL<br>della Provincia di Bergamo<br>Via Galliccioli, 4<br>Comitato di<br>BioEtica<br>Bergamo, Bergamo 24121 | IRB/IEC<br>Approval of<br>Protocol<br>Amendment # 13         | 15-SEP-2020 |
| Italy | 3475-061 -<br>0468 | Comitato di BioEtica della ASL<br>della Provincia di Bergamo<br>Via Galliccioli, 4<br>Comitato di<br>BioEtica<br>Bergamo, Bergamo 24121 | IRB/IEC<br>Approval of<br>Protocol<br>Amendment # 2          | 23-JUL-2015 |
| Italy | 3475-061 -<br>0468 | Comitato di BioEtica della ASL<br>della Provincia di Bergamo<br>Via Galliccioli, 4<br>Comitato di<br>BioEtica<br>Bergamo, Bergamo 24121 | IRB/IEC<br>Approval of<br>Protocol<br>Amendment # 5          | 22-MAR-2016 |
| Italy | 3475-061 -<br>0468 | Comitato di BioEtica della ASL<br>della Provincia di Bergamo<br>Via Galliccioli, 4<br>Comitato di<br>BioEtica<br>Bergamo, Bergamo 24121 | IRB/IEC<br>Approval of<br>Protocol<br>Amendment # 7          | 16-DEC-2016 |
| Italy | 3475-061 -<br>0468 | Comitato di BioEtica della ASL<br>della Provincia di Bergamo<br>Via Galliccioli, 4<br>Comitato di<br>BioEtica<br>Bergamo, Bergamo 24121 | IRB/IEC<br>Approval of<br>Protocol<br>Amendment # 9          | 14-DEC-2017 |
| Italy | 3475-061 -<br>0469 | A.O. Istituti Ospitalieri di<br>Cremona Viale Concordia 1<br>Oncologia medica<br>Cremona, Cremona<br>26100<br>Italy                     | Central IRB/IEC<br>Approval of<br>Protocol                   | 22-APR-2015 |
| Italy | 3475-061 -<br>0469 | A.O. Istituti Ospitalieri di<br>Cremona Viale Concordia 1<br>Oncologia medica<br>Cremona, Cremona<br>26100<br>Italy                     | Central IRB/IEC<br>Approval of<br>Protocol<br>Amendment # 11 | 28-MAR-2018 |
| Italy | 3475-061 -<br>0469 | A.O. Istituti Ospitalieri di<br>Cremona Viale Concordia 1<br>Oncologia medica<br>Cremona, Cremona<br>26100<br>Italy                     | Central IRB/IEC<br>Approval of<br>Protocol<br>Amendment # 13 | 28-MAY-2020 |
| Italy | 3475-061 -         | A.O. Istituti Ospitalieri di                                                                                                            | Central IRB/IEC                                              | 24-AUG-2015 |

|       |                    |                                                                                                                                                |                                                              |             |
|-------|--------------------|------------------------------------------------------------------------------------------------------------------------------------------------|--------------------------------------------------------------|-------------|
|       | 0469               | Cremona Viale Concordia 1<br>Oncologia medica<br>Cremona, Cremona<br>26100<br>Italy                                                            | Approval of<br>Protocol<br>Amendment # 2                     |             |
| Italy | 3475-061 -<br>0469 | A.O. Istituti Ospitalieri di<br>Cremona Viale Concordia 1<br>Oncologia medica<br>Cremona, Cremona<br>26100<br>Italy                            | Central IRB/IEC<br>Approval of<br>Protocol<br>Amendment # 5  | 16-MAR-2016 |
| Italy | 3475-061 -<br>0469 | A.O. Istituti Ospitalieri di<br>Cremona Viale Concordia 1<br>Oncologia medica<br>Cremona, Cremona 26100 Italy                                  | Central IRB/IEC<br>Approval of<br>Protocol<br>Amendment # 7  | 29-DEC-2016 |
| Italy | 3475-061 -<br>0469 | A.O. Istituti Ospitalieri di Cremona<br>Viale Concordia 1 Oncologia<br>medica Cremona, Cremona 26100<br>Italy                                  | Central IRB/IEC<br>Approval<br>of Protocol<br>Amendment # 9  | 23-NOV-2017 |
| Italy | 3475-061 -<br>0469 | A.O. Istituti Ospitalieri di<br>Cremona Viale Concordia 1<br>Oncologia medica<br>Cremona, Cremona 26100 Italy                                  | IRB/IEC<br>Approval of<br>Protocol                           | 16-OCT-2015 |
| Italy | 3475-061 -<br>0469 | A.O. Istituti Ospitalieri di Cremona<br>Viale Concordia 1 Oncologia<br>medica Cremona, Cremona 26100<br>Italy                                  | IRB/IEC<br>Approval of<br>Protocol<br>Amendment # 2          | 14-JAN-2016 |
| Italy | 3475-061 -<br>0469 | A.O. Istituti Ospitalieri di<br>Cremona Viale Concordia 1<br>Oncologia medica<br>Cremona, Cremona<br>26100<br>Italy                            | IRB/IEC<br>Approval of<br>Protocol<br>Amendment # 5          | 29-APR-2016 |
| Italy | 3475-061 -<br>0469 | A.O. Istituti Ospitalieri di<br>Cremona Viale Concordia 1<br>Oncologia medica<br>Cremona, Cremona<br>26100<br>Italy                            | IRB/IEC<br>Approval of<br>Protocol<br>Amendment # 7          | 03-MAR-2017 |
| Italy | 3475-061 -<br>0469 | A.O. Istituti Ospitalieri di<br>Cremona Viale Concordia 1<br>Oncologia medica<br>Cremona, Cremona<br>26100<br>Italy                            | IRB/IEC<br>Approval of<br>Protocol<br>Amendment # 9          | 09-MAR-2018 |
| Italy | 3475-061 -<br>0470 | Comitato Etico Az. Osp.<br>Specialistica dei Colli - Monaldi-<br>Cotugno-CTO<br>Via Leonardo Bianchi<br>Comitato Etico<br>Napoli, Napoli 80131 | Central IRB/IEC<br>Approval of<br>Protocol                   | 22-APR-2015 |
| Italy | 3475-061 -<br>0470 | Comitato Etico Az. Osp.<br>Specialistica dei Colli - Monaldi-<br>Cotugno-CTO<br>Via Leonardo Bianchi<br>Comitato Etico Napoli, Napoli<br>80131 | Central IRB/IEC<br>Approval of<br>Protocol<br>Amendment # 11 | 28-MAR-2018 |
| Italy | 3475-061 -<br>0470 | Comitato Etico Az. Osp.<br>Specialistica dei<br>Colli - Monaldi-                                                                               | Central IRB/IEC<br>Approval<br>of Protocol                   | 28-MAY-2020 |

|       |                 |                                                                                                                                      |                                                       |             |
|-------|-----------------|--------------------------------------------------------------------------------------------------------------------------------------|-------------------------------------------------------|-------------|
|       |                 | Cotugno-CTO Via Leonardo Bianchi<br>Comitato Etico<br>Napoli, Napoli 80131                                                           | Amendment # 13                                        |             |
| Italy | 3475-061 - 0470 | Comitato Etico Az. Osp. Specialistica dei Colli - Monaldi-Cotugno-CTO<br>Via Leonardo Bianchi<br>Comitato Etico Napoli, Napoli 80131 | Central IRB/IEC Approval of Protocol<br>Amendment # 2 | 24-AUG-2015 |
| Italy | 3475-061 - 0470 | Comitato Etico Az. Osp. Specialistica dei Colli - Monaldi-Cotugno-CTO Via Leonardo Bianchi<br>Comitato Etico Napoli, Napoli 80131    | Central IRB/IEC Approval of Protocol<br>Amendment # 5 | 16-MAR-2016 |
| Italy | 3475-061 - 0470 | Comitato Etico Az. Osp. Specialistica dei Colli - Monaldi-Cotugno-CTO<br>Via Leonardo Bianchi<br>Comitato Etico Napoli, Napoli 80131 | Central IRB/IEC Approval of Protocol<br>Amendment # 7 | 29-DEC-2016 |
| Italy | 3475-061 - 0470 | Comitato Etico Az. Osp. Specialistica dei Colli - Monaldi-Cotugno-CTO<br>Via Leonardo Bianchi<br>Comitato Etico Napoli, Napoli 80131 | Central IRB/IEC Approval of Protocol<br>Amendment # 9 | 23-NOV-2017 |
| Italy | 3475-061 - 0470 | Comitato Etico Az. Osp. Specialistica dei Colli - Monaldi-Cotugno-CTO<br>Via Leonardo Bianchi<br>Comitato Etico Napoli, Napoli 80131 | IRB/IEC Approval of Protocol                          | 11-JUN-2015 |
| Italy | 3475-061 - 0470 | Comitato Etico Az. Osp. Specialistica dei Colli - Monaldi-Cotugno-CTO<br>Via Leonardo Bianchi<br>Comitato Etico Napoli, Napoli 80131 | IRB/IEC Approval of Protocol<br>Amendment # 11        | 09-MAY-2018 |
| Italy | 3475-061 - 0470 | Comitato Etico Az. Osp. Specialistica dei Colli - Monaldi-Cotugno-CTO<br>Via Leonardo Bianchi<br>Comitato Etico Napoli, Napoli 80131 | IRB/IEC Approval of Protocol<br>Amendment # 2         | 07-SEP-2015 |
| Italy | 3475-061 - 0470 | Comitato Etico Az. Osp. Specialistica dei Colli - Monaldi-Cotugno-CTO Via Leonardo Bianchi<br>Comitato Etico Napoli, Napoli 80131    | IRB/IEC Approval of Protocol<br>Amendment # 5         | 07-APR-2016 |
| Italy | 3475-061 - 0470 | Comitato Etico Az. Osp. Specialistica dei Colli - Monaldi-Cotugno-CTO<br>Via Leonardo Bianchi<br>Comitato Etico Napoli, Napoli 80131 | IRB/IEC Approval of Protocol<br>Amendment # 7         | 19-JAN-2017 |

|       |                 |                                                                                                                                |                                                     |             |
|-------|-----------------|--------------------------------------------------------------------------------------------------------------------------------|-----------------------------------------------------|-------------|
| Italy | 3475-061 - 0470 | Comitato Etico Az. Osp. Specialistica dei Colli - Monaldi-Cotugno-CTO Via Leonardo Bianchi Comitato Etico Napoli, Napoli 80131 | IRB/IEC Approval of Protocol Amendment # 9          | 22-JAN-2018 |
| Italy | 3475-061 - 0471 | Fondazione IRCCS Istituto Nazionale dei Tumori di Milano Via Venezian 1 Comitato Etico Milan, Milano 20133                     | Central IRB/IEC Approval of Protocol                | 22-APR-2015 |
| Italy | 3475-061 - 0471 | Fondazione IRCCS Istituto Nazionale dei Tumori di Milano Via Venezian 1 Comitato Etico Milan, Milano 20133                     | Central IRB/IEC Approval of Protocol Amendment # 11 | 28-MAR-2018 |
| Italy | 3475-061 - 0471 | Fondazione IRCCS Istituto Nazionale dei Tumori di Milano Via Venezian 1 Comitato Etico Milan, Milano 20133                     | Central IRB/IEC Approval of Protocol Amendment # 13 | 28-MAY-2020 |
| Italy | 3475-061 - 0471 | Fondazione IRCCS Istituto Nazionale dei Tumori di Milano Via Venezian 1 Comitato Etico Milan, Milano 20133                     | Central IRB/IEC Approval of Protocol Amendment # 2  | 24-AUG-2015 |
| Italy | 3475-061 - 0471 | Fondazione IRCCS Istituto Nazionale dei Tumori di Milano Via Venezian 1 Comitato Etico Milan, Milano 20133                     | Central IRB/IEC Approval of Protocol Amendment # 5  | 16-MAR-2016 |
| Italy | 3475-061 - 0471 | Fondazione IRCCS Istituto Nazionale dei Tumori di Milano Via Venezian 1 Comitato Etico Milan, Milano 20133                     | Central IRB/IEC Approval of Protocol Amendment # 7  | 29-DEC-2016 |
| Italy | 3475-061 - 0471 | Fondazione IRCCS Istituto Nazionale dei Tumori di Milano Via Venezian 1 Comitato Etico Milan, Milano 20133                     | Central IRB/IEC Approval of Protocol Amendment # 9  | 23-NOV-2017 |
| Italy | 3475-061 - 0471 | Fondazione IRCCS Istituto Nazionale dei Tumori di Milano Via Venezian 1 Comitato Etico Milan, Milano 20133                     | IRB/IEC Approval of Protocol                        | 29-APR-2015 |
| Italy | 3475-061 - 0471 | Fondazione IRCCS Istituto Nazionale dei Tumori di Milano Via Venezian 1 Comitato Etico Milan, Milano 20133                     | IRB/IEC Approval of Protocol Amendment # 5          | 29-FEB-2016 |

|         |                    |                                                                                                                                         |                                                              |             |
|---------|--------------------|-----------------------------------------------------------------------------------------------------------------------------------------|--------------------------------------------------------------|-------------|
|         |                    | Etico<br>Milan, Milano 20133                                                                                                            |                                                              |             |
| Italy   | 3475-061 -<br>0471 | Fondazione IRCCS Istituto<br>Nazionale dei Tumori di Milano<br>Via<br>Venezian 1<br>Comitato<br>Etico<br>Milan, Milano 20133            | IRB/IEC<br>Approval of<br>Protocol<br>Amendment # 7          | 21-DEC-2016 |
| Italy   | 3475-061 -<br>0471 | Fondazione IRCCS Istituto<br>Nazionale dei Tumori di Milano<br>Via<br>Venezian 1<br>Comitato<br>Etico<br>Milan, Milano 20133            | IRB/IEC<br>Approval of<br>Protocol<br>Amendment # 9          | 22-NOV-2017 |
| Germany | 3475-061 -<br>0480 | Ethikkommission der Med.<br>Fakultaet der Universitaet<br>Wuerzburg Versbacher Str. 9<br>Institut fuer Pharmakologie und<br>Toxikologie | Central IRB/IEC<br>Approval of<br>Protocol                   | 24-JUL-2015 |
| Germany | 3475-061 -<br>0480 | Ethikkommission der Med.<br>Fakultaet der Universitaet<br>Wuerzburg Versbacher Str. 9<br>Institut fuer Pharmakologie und<br>Toxikologie | Central IRB/IEC<br>Approval of<br>Protocol<br>Amendment # 11 | 22-DEC-2017 |
| Germany | 3475-061 -<br>0480 | Ethikkommission der Med.<br>Fakultaet der Universitaet<br>Wuerzburg Versbacher Str. 9<br>Institut fuer Pharmakologie und<br>Toxikologie | Central IRB/IEC<br>Approval of<br>Protocol<br>Amendment # 2  | 20-AUG-2015 |
| Germany | 3475-061 -<br>0480 | Ethikkommission der Med.<br>Fakultaet der Universitaet<br>Wuerzburg Versbacher Str. 9<br>Institut fuer Pharmakologie und<br>Toxikologie | Central IRB/IEC<br>Approval of<br>Protocol<br>Amendment # 5  | 22-JAN-2016 |
| Germany | 3475-061 -<br>0480 | Ethikkommission der Med.<br>Fakultaet der Universitaet<br>Wuerzburg Versbacher Str. 9<br>Institut fuer Pharmakologie und<br>Toxikologie | Central IRB/IEC<br>Approval of<br>Protocol<br>Amendment # 7  | 14-DEC-2016 |
| Germany | 3475-061 -<br>0480 | Ethikkommission der Med.<br>Fakultaet der Universitaet<br>Wuerzburg Versbacher Str. 9<br>Institut fuer Pharmakologie und<br>Toxikologie | Central IRB/IEC<br>Approval of<br>Protocol<br>Amendment # 9  | 08-NOV-2017 |
| Germany | 3475-061 -<br>0482 | Ethikkommission der Med.<br>Fakultaet der Universitaet<br>Wuerzburg Versbacher Str. 9<br>Institut fuer Pharmakologie und<br>Toxikologie | Central IRB/IEC<br>Approval of<br>Protocol                   | 24-JUL-2015 |
| Germany | 3475-061 -<br>0482 | Ethikkommission der Med.<br>Fakultaet der Universitaet<br>Wuerzburg Versbacher Str. 9<br>Institut fuer Pharmakologie und<br>Toxikologie | Central IRB/IEC<br>Approval of<br>Protocol<br>Amendment # 11 | 22-DEC-2017 |
| Germany | 3475-061 -<br>0482 | Ethikkommission der Med.<br>Fakultaet der Universitaet<br>Wuerzburg Versbacher Str. 9<br>Institut fuer Pharmakologie und                | Central IRB/IEC<br>Approval of<br>Protocol<br>Amendment # 2  | 20-AUG-2015 |



|         |                 |                                                                                                                          |                                                     |             |
|---------|-----------------|--------------------------------------------------------------------------------------------------------------------------|-----------------------------------------------------|-------------|
|         |                 | Toxikologie                                                                                                              |                                                     |             |
| Germany | 3475-061 - 0482 | Ethikkommission der Med. Fakultät der Universität Würzburg Versbacher Str. 9 Institut fuer Pharmakologie und Toxikologie | Central IRB/IEC Approval of Protocol Amendment # 5  | 22-JAN-2016 |
| Germany | 3475-061 - 0482 | Ethikkommission der Med. Fakultät der Universität Würzburg Versbacher Str. 9 Institut fuer Pharmakologie und Toxikologie | Central IRB/IEC Approval of Protocol Amendment # 7  | 14-DEC-2016 |
| Germany | 3475-061 - 0482 | Ethikkommission der Med. Fakultät der Universität Würzburg Versbacher Str. 9 Institut fuer Pharmakologie und Toxikologie | Central IRB/IEC Approval of Protocol Amendment # 9  | 08-NOV-2017 |
| Germany | 3475-061 - 0484 | Ethikkommission der Med. Fakultät der Universität Würzburg Versbacher Str. 9 Institut fuer Pharmakologie und Toxikologie | Central IRB/IEC Approval of Protocol                | 24-JUL-2015 |
| Germany | 3475-061 - 0484 | Ethikkommission der Med. Fakultät der Universität Würzburg Versbacher Str. 9 Institut fuer Pharmakologie und Toxikologie | Central IRB/IEC Approval of Protocol Amendment # 11 | 22-DEC-2017 |
| Germany | 3475-061 - 0484 | Ethikkommission der Med. Fakultät der Universität Würzburg Versbacher Str. 9 Institut fuer Pharmakologie und Toxikologie | Central IRB/IEC Approval of Protocol Amendment # 2  | 20-AUG-2015 |
| Germany | 3475-061 - 0484 | Ethikkommission der Med. Fakultät der Universität Würzburg Versbacher Str. 9 Institut fuer Pharmakologie und Toxikologie | Central IRB/IEC Approval of Protocol Amendment # 5  | 22-JAN-2016 |
| Germany | 3475-061 - 0484 | Ethikkommission der Med. Fakultät der Universität Würzburg Versbacher Str. 9 Institut fuer Pharmakologie und Toxikologie | Central IRB/IEC Approval of Protocol Amendment # 7  | 14-DEC-2016 |
| Germany | 3475-061 - 0484 | Ethikkommission der Med. Fakultät der Universität Würzburg Versbacher Str. 9 Institut fuer Pharmakologie und Toxikologie | Central IRB/IEC Approval of Protocol Amendment # 9  | 08-NOV-2017 |
| Germany | 3475-061 - 0484 | Ethikkommission der Med. Fakultät der Universität Würzburg Versbacher Str. 9 Institut fuer Pharmakologie und Toxikologie | IRB/IEC Approval of Protocol                        | 10-SEP-2015 |
| Germany | 3475-061 - 0485 | Ethikkommission der Med. Fakultät der Universität Würzburg Versbacher Str. 9 Institut fuer Pharmakologie und Toxikologie | Central IRB/IEC Approval of Protocol                | 24-JUL-2015 |
| Germany | 3475-061 - 0485 | Ethikkommission der Med. Fakultät der Universität Würzburg Versbacher Str. 9 Institut fuer Pharmakologie und Toxikologie | Central IRB/IEC Approval of Protocol Amendment # 11 | 22-DEC-2017 |

|         |                 |                                                                                                                          |                                                     |             |
|---------|-----------------|--------------------------------------------------------------------------------------------------------------------------|-----------------------------------------------------|-------------|
|         |                 | Toxikologie                                                                                                              |                                                     |             |
| Germany | 3475-061 - 0485 | Ethikkommission der Med. Fakultät der Universität Würzburg Versbacher Str. 9 Institut fuer Pharmakologie und Toxikologie | Central IRB/IEC Approval of Protocol Amendment # 2  | 20-AUG-2015 |
| Germany | 3475-061 - 0485 | Ethikkommission der Med. Fakultät der Universität Würzburg Versbacher Str. 9 Institut fuer Pharmakologie und Toxikologie | Central IRB/IEC Approval of Protocol Amendment # 5  | 22-JAN-2016 |
| Germany | 3475-061 - 0485 | Ethikkommission der Med. Fakultät der Universität Würzburg Versbacher Str. 9 Institut fuer Pharmakologie und Toxikologie | Central IRB/IEC Approval of Protocol Amendment # 7  | 14-DEC-2016 |
| Germany | 3475-061 - 0485 | Ethikkommission der Med. Fakultät der Universität Würzburg Versbacher Str. 9 Institut fuer Pharmakologie und Toxikologie | Central IRB/IEC Approval of Protocol Amendment # 9  | 08-NOV-2017 |
| Germany | 3475-061 - 0486 | Ethikkommission der Med. Fakultät der Universität Würzburg Versbacher Str. 9 Institut fuer Pharmakologie und Toxikologie | Central IRB/IEC Approval of Protocol                | 24-JUL-2015 |
| Germany | 3475-061 - 0486 | Ethikkommission der Med. Fakultät der Universität Würzburg Versbacher Str. 9 Institut fuer Pharmakologie und Toxikologie | Central IRB/IEC Approval of Protocol Amendment # 11 | 22-DEC-2017 |
| Germany | 3475-061 - 0486 | Ethikkommission der Med. Fakultät der Universität Würzburg Versbacher Str. 9 Institut fuer Pharmakologie und Toxikologie | Central IRB/IEC Approval of Protocol Amendment # 2  | 20-AUG-2015 |
| Germany | 3475-061 - 0486 | Ethikkommission der Med. Fakultät der Universität Würzburg Versbacher Str. 9 Institut fuer Pharmakologie und Toxikologie | Central IRB/IEC Approval of Protocol Amendment # 5  | 22-JAN-2016 |
| Germany | 3475-061 - 0486 | Ethikkommission der Med. Fakultät der Universität Würzburg Versbacher Str. 9 Institut fuer Pharmakologie und Toxikologie | Central IRB/IEC Approval of Protocol Amendment # 7  | 14-DEC-2016 |
| Germany | 3475-061 - 0486 | Ethikkommission der Med. Fakultät der Universität Würzburg Versbacher Str. 9 Institut fuer Pharmakologie und Toxikologie | Central IRB/IEC Approval of Protocol Amendment # 9  | 08-NOV-2017 |
| Germany | 3475-061 - 0487 | Ethikkommission der Med. Fakultät der Universität Würzburg Versbacher Str. 9 Institut fuer Pharmakologie und Toxikologie | Central IRB/IEC Approval of Protocol                | 24-JUL-2015 |
| Germany | 3475-061 - 0487 | Ethikkommission der Med. Fakultät der Universität Würzburg Versbacher Str. 9 Institut fuer Pharmakologie und Toxikologie | Central IRB/IEC Approval of Protocol Amendment # 11 | 22-DEC-2017 |

|         |                 |                                                                                                                          |                                                     |             |
|---------|-----------------|--------------------------------------------------------------------------------------------------------------------------|-----------------------------------------------------|-------------|
|         |                 | Toxikologie                                                                                                              |                                                     |             |
| Germany | 3475-061 - 0487 | Ethikkommission der Med. Fakultät der Universität Würzburg Versbacher Str. 9 Institut fuer Pharmakologie und Toxikologie | Central IRB/IEC Approval of Protocol Amendment # 2  | 20-AUG-2015 |
| Germany | 3475-061 - 0487 | Ethikkommission der Med. Fakultät der Universität Würzburg Versbacher Str. 9 Institut fuer Pharmakologie und Toxikologie | Central IRB/IEC Approval of Protocol Amendment # 5  | 22-JAN-2016 |
| Germany | 3475-061 - 0487 | Ethikkommission der Med. Fakultät der Universität Würzburg Versbacher Str. 9 Institut fuer Pharmakologie und Toxikologie | Central IRB/IEC Approval of Protocol Amendment # 7  | 14-DEC-2016 |
| Germany | 3475-061 - 0487 | Ethikkommission der Med. Fakultät der Universität Würzburg Versbacher Str. 9 Institut fuer Pharmakologie und Toxikologie | Central IRB/IEC Approval of Protocol Amendment # 9  | 08-NOV-2017 |
| Germany | 3475-061 - 0487 | Ethikkommission der Med. Fakultät der Universität Würzburg Versbacher Str. 9 Institut fuer Pharmakologie und Toxikologie | IRB/IEC Approval of Protocol                        | 28-AUG-2015 |
| Germany | 3475-061 - 0488 | Ethikkommission der Med. Fakultät der Universität Würzburg Versbacher Str. 9 Institut fuer Pharmakologie und Toxikologie | Central IRB/IEC Approval of Protocol                | 24-JUL-2015 |
| Germany | 3475-061 - 0488 | Ethikkommission der Med. Fakultät der Universität Würzburg Versbacher Str. 9 Institut fuer Pharmakologie und Toxikologie | Central IRB/IEC Approval of Protocol Amendment # 11 | 22-DEC-2017 |
| Germany | 3475-061 - 0488 | Ethikkommission der Med. Fakultät der Universität Würzburg Versbacher Str. 9 Institut fuer Pharmakologie und Toxikologie | Central IRB/IEC Approval of Protocol Amendment # 2  | 20-AUG-2015 |
| Germany | 3475-061 - 0488 | Ethikkommission der Med. Fakultät der Universität Würzburg Versbacher Str. 9 Institut fuer Pharmakologie und Toxikologie | Central IRB/IEC Approval of Protocol Amendment # 5  | 22-JAN-2016 |
| Germany | 3475-061 - 0488 | Ethikkommission der Med. Fakultät der Universität Würzburg Versbacher Str. 9 Institut fuer Pharmakologie und Toxikologie | Central IRB/IEC Approval of Protocol Amendment # 7  | 14-DEC-2016 |
| Germany | 3475-061 - 0488 | Ethikkommission der Med. Fakultät der Universität Würzburg Versbacher Str. 9 Institut fuer Pharmakologie und Toxikologie | Central IRB/IEC Approval of Protocol Amendment # 9  | 08-NOV-2017 |
| Germany | 3475-061 - 0489 | Ethikkommission der Med. Fakultät der Universität Würzburg Versbacher Str. 9 Institut fuer Pharmakologie und             | Central IRB/IEC Approval of Protocol                | 24-JUL-2015 |

|         |                 |                                                                                                                          |                                                     |             |
|---------|-----------------|--------------------------------------------------------------------------------------------------------------------------|-----------------------------------------------------|-------------|
|         |                 | Toxikologie                                                                                                              |                                                     |             |
| Germany | 3475-061 - 0489 | Ethikkommission der Med. Fakultät der Universität Würzburg Versbacher Str. 9 Institut fuer Pharmakologie und Toxikologie | Central IRB/IEC Approval of Protocol Amendment # 11 | 22-DEC-2017 |
| Germany | 3475-061 - 0489 | Ethikkommission der Med. Fakultät der Universität Würzburg Versbacher Str. 9 Institut fuer Pharmakologie und Toxikologie | Central IRB/IEC Approval of Protocol Amendment # 2  | 20-AUG-2015 |
| Germany | 3475-061 - 0489 | Ethikkommission der Med. Fakultät der Universität Würzburg Versbacher Str. 9 Institut fuer Pharmakologie und Toxikologie | Central IRB/IEC Approval of Protocol Amendment # 5  | 22-JAN-2016 |
| Germany | 3475-061 - 0489 | Ethikkommission der Med. Fakultät der Universität Würzburg Versbacher Str. 9 Institut fuer Pharmakologie und Toxikologie | Central IRB/IEC Approval of Protocol Amendment # 7  | 14-DEC-2016 |
| Germany | 3475-061 - 0489 | Ethikkommission der Med. Fakultät der Universität Würzburg Versbacher Str. 9 Institut fuer Pharmakologie und Toxikologie | Central IRB/IEC Approval of Protocol Amendment # 9  | 08-NOV-2017 |
| Germany | 3475-061 - 0489 | Ethikkommission der Med. Fakultät der Universität Würzburg Versbacher Str. 9 Institut fuer Pharmakologie und Toxikologie | IRB/IEC Approval of Protocol                        | 28-AUG-2015 |
| Finland | 3475-061 - 0512 | HUS tutkimuseettiset toimikunnat Biomedicum Helsinki 2C PL 705 Helsinki, Uusimaa 00029 Finland                           | Central IRB/IEC Approval of Protocol                | 22-APR-2015 |
| Finland | 3475-061 - 0512 | HUS tutkimuseettiset toimikunnat Biomedicum Helsinki 2C PL 705 Helsinki, Uusimaa 00029 Finland                           | Central IRB/IEC Approval of Protocol Amendment # 2  | 26-AUG-2015 |
| Finland | 3475-061 - 0512 | HUS tutkimuseettiset toimikunnat Biomedicum Helsinki 2C PL 705 Helsinki, Uusimaa 00029 Finland                           | Central IRB/IEC Approval of Protocol Amendment # 7  | 14-DEC-2016 |
| Finland | 3475-061 - 0512 | HUS tutkimuseettiset toimikunnat Biomedicum Helsinki 2C PL 705 Helsinki, Uusimaa 00029 Finland                           | IRB/IEC Approval of Protocol Amendment # 5          | 11-FEB-2016 |
| Finland | 3475-061 - 0513 | HUS tutkimuseettiset toimikunnat Biomedicum Helsinki 2C PL 705 Helsinki, Uusimaa 00029 Finland                           | Central IRB/IEC Approval of Protocol                | 22-APR-2015 |
| Finland | 3475-061 - 0513 | HUS tutkimuseettiset toimikunnat Biomedicum Helsinki 2C PL 705 Helsinki, Uusimaa 00029 Finland                           | Central IRB/IEC Approval of Protocol Amendment # 2  | 26-AUG-2015 |

|         |                 |                                                                                                                                                                                                                                            |                                                     |             |
|---------|-----------------|--------------------------------------------------------------------------------------------------------------------------------------------------------------------------------------------------------------------------------------------|-----------------------------------------------------|-------------|
|         |                 | Finland                                                                                                                                                                                                                                    |                                                     |             |
| Finland | 3475-061 - 0513 | HUS tutkimuseettiset toimikunnat Biomedicum Helsinki 2C PL 705 Helsinki, Uusimaa 00029 Finland                                                                                                                                             | Central IRB/IEC Approval of Protocol Amendment # 7  | 14-DEC-2016 |
| Finland | 3475-061 - 0513 | HUS tutkimuseettiset toimikunnat Biomedicum Helsinki 2C PL 705 Helsinki, Uusimaa 00029 Finland                                                                                                                                             | IRB/IEC Approval of Protocol Amendment # 5          | 11-FEB-2016 |
| Estonia | 3475-061 - 0528 | Research Ethics Committee of the National Institute for Health Development Hiiu 42 Tallinn, Harjumaa 11619 Estonia Tallinn Medical Research Ethics Committee Hiiu str. 42 Tallinn, Harjumaa 11619 Estonia Research Ethics Committee of the | Central IRB/IEC Approval of Protocol                | 12-MAR-2015 |
| Estonia | 3475-061 - 0528 | Research Ethics Committee of the National Institute for Health Development Hiiu 42 Tallinn, Harjumaa 11619 Estonia Tallinn Medical Research Ethics Committee Hiiu str. 42 Tallinn, Harjumaa 11619 Estonia Research Ethics Committee of the | Central IRB/IEC Approval of Protocol Amendment # 11 | 02-JAN-2018 |
| Estonia | 3475-061 - 0528 | Research Ethics Committee of the National Institute for Health Development Hiiu 42 Tallinn, Harjumaa 11619 Estonia Tallinn Medical Research Ethics Committee Hiiu str. 42 Tallinn, Harjumaa 11619 Estonia Research Ethics Committee of the | Central IRB/IEC Approval of Protocol Amendment # 2  | 11-JUN-2015 |
| Estonia | 3475-061 - 0528 | Research Ethics Committee of the National Institute for Health Development Hiiu 42 Tallinn, Harjumaa 11619 Estonia Tallinn Medical Research Ethics Committee Hiiu str. 42 Tallinn, Harjumaa 11619 Estonia Research Ethics Committee of the | Central IRB/IEC Approval of Protocol Amendment # 5  | 23-DEC-2015 |
| Estonia | 3475-061 -      | Research Ethics Committee of the                                                                                                                                                                                                           | Central IRB/IEC                                     | 29-DEC-2016 |

|         |                 |                                                                                                                                                                                                                                                                    |                                                     |             |
|---------|-----------------|--------------------------------------------------------------------------------------------------------------------------------------------------------------------------------------------------------------------------------------------------------------------|-----------------------------------------------------|-------------|
|         | 0528            | National Institute for Health Development<br>Hiiu 42<br>Tallinn, Harjumaa<br>11619 Estonia<br>Tallinn Medical Research Ethics Committee<br>Hiiu str. 42<br>Tallinn, Harjumaa<br>11619 Estonia<br>Research Ethics Committee of the                                  | Approval of Protocol Amendment # 7                  |             |
| Estonia | 3475-061 - 0528 | Research Ethics Committee of the National Institute for Health Development<br>Hiiu 42<br>Tallinn, Harjumaa<br>11619 Estonia<br>Tallinn Medical Research Ethics Committee<br>Hiiu str. 42<br>Tallinn, Harjumaa<br>11619 Estonia<br>Research Ethics Committee of the | Central IRB/IEC Approval of Protocol Amendment # 9  | 01-NOV-2017 |
| Estonia | 3475-061 - 0528 | Research Ethics Committee of the National Institute for Health Development<br>Hiiu 42<br>Tallinn, Harjumaa<br>11619 Estonia<br>Tallinn Medical Research Ethics Committee<br>Hiiu str. 42<br>Tallinn, Harjumaa<br>11619 Estonia<br>Research Ethics Committee of the | IRB/IEC Approval of Protocol                        | 12-MAR-2015 |
| Estonia | 3475-061 - 0529 | Tallinn Medical Research Ethics Committee<br>Hiiu str. 42<br>Tallinn, Harjumaa<br>11619 Estonia<br>Research Ethics Committee of the National Institute for Health Development                                                                                      | Central IRB/IEC Approval of Protocol                | 12-MAR-2015 |
| Estonia | 3475-061 - 0529 | Tallinn Medical Research Ethics Committee<br>Hiiu str. 42<br>Tallinn, Harjumaa<br>11619 Estonia<br>Research Ethics Committee of the National Institute for Health Development                                                                                      | Central IRB/IEC Approval of Protocol Amendment # 11 | 02-JAN-2018 |
| Estonia | 3475-061 - 0529 | Tallinn Medical Research Ethics Committee<br>Hiiu str. 42<br>Tallinn, Harjumaa<br>11619 Estonia<br>Research Ethics Committee of the National Institute for Health Development                                                                                      | Central IRB/IEC Approval of Protocol Amendment # 2  | 11-JUN-2015 |
| Estonia | 3475-061 -      | Tallinn Medical Research Ethics                                                                                                                                                                                                                                    | Central IRB/IEC                                     | 23-DEC-2015 |

|         |                    |                                                                                                                                                                                        |                                                              |             |
|---------|--------------------|----------------------------------------------------------------------------------------------------------------------------------------------------------------------------------------|--------------------------------------------------------------|-------------|
|         | 0529               | Committee<br>Hiiu str. 42<br>Tallinn, Harjumaa<br>11619 Estonia<br>Research Ethics Committee of the<br>National Institute for Health<br>Development                                    | Approval of<br>Protocol<br>Amendment # 5                     |             |
| Estonia | 3475-061 -<br>0529 | Tallinn Medical Research Ethics<br>Committee<br>Hiiu str. 42<br>Tallinn, Harjumaa<br>11619 Estonia<br>Research Ethics Committee of the<br>National Institute for Health<br>Development | Central IRB/IEC<br>Approval of<br>Protocol<br>Amendment # 7  | 29-DEC-2016 |
| Estonia | 3475-061 -<br>0529 | Tallinn Medical Research Ethics<br>Committee<br>Hiiu str. 42<br>Tallinn, Harjumaa<br>11619 Estonia<br>Research Ethics Committee of the<br>National Institute for Health<br>Development | Central IRB/IEC<br>Approval of<br>Protocol<br>Amendment # 9  | 01-NOV-2017 |
| Estonia | 3475-061 -<br>0529 | Tallinn Medical Research Ethics<br>Committee<br>Hiiu str. 42<br>Tallinn, Harjumaa<br>11619 Estonia<br>Research Ethics Committee of the<br>National Institute for Health<br>Development | IRB/IEC<br>Approval of<br>Protocol                           | 12-MAR-2015 |
| Denmark | 3475-061 -<br>0544 | Den Videnskabetiske Komite for<br>Region Nordjylland<br>Niels Bohrs vej 30<br>Regionssekretariatet Aalborg E,<br>Nordjylland 9220                                                      | Central IRB/IEC<br>Approval of<br>Protocol                   | 03-JUL-2015 |
| Denmark | 3475-061 -<br>0544 | Den Videnskabetiske Komite for<br>Region Nordjylland<br>Niels Bohrs vej 30<br>Regionssekretariatet<br>Aalborg E, Nordjylland 9220                                                      | Central IRB/IEC<br>Approval<br>of Protocol<br>Amendment # 11 | 12-JUN-2018 |
| Denmark | 3475-061 -<br>0544 | Den Videnskabetiske Komite for<br>Region Nordjylland<br>Niels Bohrs vej 30<br>Regionssekretariatet Aalborg E,<br>Nordjylland 9220                                                      | Central IRB/IEC<br>Approval of<br>Protocol<br>Amendment # 2  | 17-AUG-2015 |
| Denmark | 3475-061 -<br>0544 | Den Videnskabetiske Komite for<br>Region Nordjylland<br>Niels Bohrs vej 30<br>Regionssekretariatet<br>Aalborg E, Nordjylland 9220                                                      | Central IRB/IEC<br>Approval<br>of Protocol<br>Amendment # 4  |             |
| Denmark | 3475-061 -<br>0544 | Den Videnskabetiske Komite for<br>Region Nordjylland<br>Niels Bohrs vej 30<br>Regionssekretariatet<br>Aalborg E, Nordjylland 9220                                                      | Central IRB/IEC<br>Approval of<br>Protocol<br>Amendment # 5  | 27-APR-2016 |
| Denmark | 3475-061 -<br>0544 | Den Videnskabetiske Komite for<br>Region Nordjylland<br>Niels Bohrs vej 30<br>Regionssekretariatet                                                                                     | Central IRB/IEC<br>Approval of<br>Protocol<br>Amendment # 7  | 13-JAN-2017 |



|         |                 |                                                                                                                                |                                                     |             |
|---------|-----------------|--------------------------------------------------------------------------------------------------------------------------------|-----------------------------------------------------|-------------|
|         |                 | Aalborg E, Nordjylland 9220                                                                                                    |                                                     |             |
| Denmark | 3475-061 - 0544 | Den Videnskabetiske Komite for Region Nordjylland<br>Niels Bohrs vej 30<br>Regionssekretariatet<br>Aalborg E, Nordjylland 9220 | Central IRB/IEC Approval of Protocol Amendment # 9  | 18-DEC-2017 |
| Denmark | 3475-061 - 0544 | Den Videnskabetiske Komite for Region Nordjylland<br>Niels Bohrs vej 30<br>Regionssekretariatet<br>Aalborg E, Nordjylland 9220 | IRB/IEC Approval of Protocol                        | 03-JUL-2015 |
| Denmark | 3475-061 - 0544 | Den Videnskabetiske Komite for Region Nordjylland<br>Niels Bohrs vej 30<br>Regionssekretariatet Aalborg E, Nordjylland 9220    | IRB/IEC Approval of Protocol Amendment # 5          | 27-APR-2016 |
| Denmark | 3475-061 - 0545 | Den Videnskabetiske Komite for Region Nordjylland<br>Niels Bohrs vej 30<br>Regionssekretariatet<br>Aalborg E, Nordjylland 9220 | Central IRB/IEC Approval of Protocol                | 03-JUL-2015 |
| Denmark | 3475-061 - 0545 | Den Videnskabetiske Komite for Region Nordjylland<br>Niels Bohrs vej 30<br>Regionssekretariatet Aalborg E, Nordjylland 9220    | Central IRB/IEC Approval of Protocol Amendment # 11 | 12-JUN-2018 |
| Denmark | 3475-061 - 0545 | Den Videnskabetiske Komite for Region Nordjylland<br>Niels Bohrs vej 30<br>Regionssekretariatet<br>Aalborg E, Nordjylland 9220 | Central IRB/IEC Approval of Protocol Amendment # 2  | 17-AUG-2015 |
| Denmark | 3475-061 - 0545 | Den Videnskabetiske Komite for Region Nordjylland<br>Niels Bohrs vej 30<br>Regionssekretariatet<br>Aalborg E, Nordjylland 9220 | Central IRB/IEC Approval of Protocol Amendment # 4  |             |
| Denmark | 3475-061 - 0545 | Den Videnskabetiske Komite for Region Nordjylland<br>Niels Bohrs vej 30<br>Regionssekretariatet<br>Aalborg E, Nordjylland 9220 | Central IRB/IEC Approval of Protocol Amendment # 5  | 27-APR-2016 |
| Denmark | 3475-061 - 0545 | Den Videnskabetiske Komite for Region Nordjylland<br>Niels Bohrs vej 30<br>Regionssekretariatet<br>Aalborg E, Nordjylland 9220 | Central IRB/IEC Approval of Protocol Amendment # 7  | 13-JAN-2017 |
| Denmark | 3475-061 - 0545 | Den Videnskabetiske Komite for Region Nordjylland<br>Niels Bohrs vej 30<br>Regionssekretariatet<br>Aalborg E, Nordjylland 9220 | Central IRB/IEC Approval of Protocol Amendment # 9  | 18-DEC-2017 |
| Denmark | 3475-061 - 0545 | Den Videnskabetiske Komite for Region Nordjylland<br>Niels Bohrs vej 30<br>Regionssekretariatet Aalborg E, Nordjylland 9220    | IRB/IEC Approval of Protocol                        | 03-JUL-2015 |
| Denmark | 3475-061 - 0545 | Den Videnskabetiske Komite for Region Nordjylland<br>Niels Bohrs vej 30<br>Regionssekretariatet                                | IRB/IEC Approval of Protocol Amendment # 5          | 27-APR-2016 |



|         |                 |                                                                                                                                     |                                                     |             |
|---------|-----------------|-------------------------------------------------------------------------------------------------------------------------------------|-----------------------------------------------------|-------------|
|         |                 | Aalborg E, Nordjylland 9220                                                                                                         |                                                     |             |
| Denmark | 3475-061 - 0546 | Den Videnskabetiske Komite for Region Nordjylland<br>Niels Bohrs vej 30<br>Regionssekretariatet Aalborg E, Nordjylland 9220         | Central IRB/IEC Approval of Protocol                | 03-JUL-2015 |
| Denmark | 3475-061 - 0546 | Den Videnskabetiske Komite for Region Nordjylland<br>Niels Bohrs vej 30<br>Regionssekretariatet Aalborg E, Nordjylland 9220         | Central IRB/IEC Approval of Protocol Amendment # 11 | 12-JUN-2018 |
| Denmark | 3475-061 - 0546 | Den Videnskabetiske Komite for Region Nordjylland<br>Niels Bohrs vej 30<br>Regionssekretariatet Aalborg E, Nordjylland 9220         | Central IRB/IEC Approval of Protocol Amendment # 2  | 17-AUG-2015 |
| Denmark | 3475-061 - 0546 | Den Videnskabetiske Komite for Region Nordjylland<br>Niels Bohrs vej 30<br>Regionssekretariatet Aalborg E, Nordjylland 9220         | Central IRB/IEC Approval of Protocol Amendment # 4  |             |
| Denmark | 3475-061 - 0546 | Den Videnskabetiske Komite for Region Nordjylland<br>Niels Bohrs vej 30<br>Regionssekretariatet Aalborg E, Nordjylland 9220         | Central IRB/IEC Approval of Protocol Amendment # 5  | 27-APR-2016 |
| Denmark | 3475-061 - 0546 | Den Videnskabetiske Komite for Region Nordjylland<br>Niels Bohrs vej 30<br>Regionssekretariatet Aalborg E, Nordjylland 9220         | Central IRB/IEC Approval of Protocol Amendment # 7  | 13-JAN-2017 |
| Denmark | 3475-061 - 0546 | Den Videnskabetiske Komite for Region Nordjylland<br>Niels Bohrs vej 30<br>Regionssekretariatet Aalborg E, Nordjylland 9220         | Central IRB/IEC Approval of Protocol Amendment # 9  | 18-DEC-2017 |
| Denmark | 3475-061 - 0546 | Den Videnskabetiske Komite for Region Nordjylland<br>Niels Bohrs vej 30<br>Regionssekretariatet Aalborg E, Nordjylland 9220         | IRB/IEC Approval of Protocol                        | 03-JUL-2015 |
| Denmark | 3475-061 - 0546 | Den Videnskabetiske Komite for Region Nordjylland<br>Niels Bohrs vej 30<br>Regionssekretariatet Aalborg E, Nordjylland 9220         | IRB/IEC Approval of Protocol Amendment # 5          | 27-APR-2016 |
| Belgium | 3475-061 - 0560 | Comite d'Ethique Hospitalo-Facultaire Erasme-ULB<br>Route de Lennik 808<br>Comite d'Ethique Anderlecht, Vlaams-Brabant 1070 Belgium | Central IRB/IEC Approval of Protocol                | 03-SEP-2015 |
| Belgium | 3475-061 - 0560 | Comite d'Ethique Hospitalo-Facultaire Erasme-ULB<br>Route de Lennik 808<br>Comite d'Ethique Anderlecht, Vlaams-Brabant 1070 Belgium | Central IRB/IEC Approval of Protocol Amendment # 2  | 03-SEP-2015 |
| Belgium | 3475-061 -      | Comite d'Ethique Hospitalo-                                                                                                         | Central IRB/IEC                                     | 05-JAN-2016 |

|         |                    |                                                                                                                                               |                                                             |             |
|---------|--------------------|-----------------------------------------------------------------------------------------------------------------------------------------------|-------------------------------------------------------------|-------------|
|         | 0560               | Facultaire Erasme-ULB<br>Route de Lennik 808<br>Comite d'Ethique<br>Anderlecht, Vlaams-Brabant 1070<br>Belgium                                | Approval of<br>Protocol<br>Amendment # 5                    |             |
| Belgium | 3475-061 -<br>0560 | Comite d'Ethique Hospitalo-<br>Facultaire Erasme-ULB<br>Route de Lennik 808<br>Comite d'Ethique<br>Anderlecht, Vlaams-Brabant 1070<br>Belgium | Central IRB/IEC<br>Approval of<br>Protocol<br>Amendment # 7 | 09-DEC-2016 |
| Belgium | 3475-061 -<br>0560 | Comite d'Ethique Hospitalo-<br>Facultaire Erasme-ULB<br>Route de Lennik 808<br>Comite d'Ethique<br>Anderlecht, Vlaams-Brabant 1070<br>Belgium | Central IRB/IEC<br>Approval of<br>Protocol<br>Amendment # 9 | 09-NOV-2017 |
| Belgium | 3475-061 -<br>0560 | Comite d'Ethique Hospitalo-<br>Facultaire Erasme-ULB<br>Route de Lennik 808<br>Comite d'Ethique<br>Anderlecht, Vlaams-Brabant 1070<br>Belgium | IRB/IEC<br>Approval of<br>Protocol                          | 03-SEP-2015 |
| Belgium | 3475-061 -         | UZ Leuven - Campus Gasthuisberg                                                                                                               | Central IRB/IEC<br>Approval                                 | 03-SEP-2015 |
| Belgium | 3475-061 -         | UZ Leuven - Campus Gasthuisberg                                                                                                               | Central IRB/IEC<br>Approval                                 | 03-SEP-2015 |
| Belgium | 3475-061 -         | UZ Leuven - Campus Gasthuisberg                                                                                                               | Central IRB/IEC<br>Approval                                 | 05-JAN-2016 |
| Belgium | 3475-061 -         | UZ Leuven - Campus Gasthuisberg                                                                                                               | Central IRB/IEC<br>Approval                                 | 09-DEC-2016 |
| Belgium | 3475-061 -         | UZ Leuven - Campus Gasthuisberg                                                                                                               | Central IRB/IEC<br>Approval                                 | 09-NOV-2017 |
| Belgium | 3475-061 -         | UZ Leuven - Campus Gasthuisberg                                                                                                               | IRB/IEC<br>Approval of                                      | 03-SEP-2015 |
| Japan   | 3475-061 -<br>0593 | Institutional Review Board of Gifu<br>University Hospital<br>1-1, Yanagido<br>Gifu, Gifu 501-1194                                             | IRB/IEC<br>Approval of<br>Protocol                          | 11-JUN-2015 |
| Japan   | 3475-061 -<br>0593 | Institutional Review Board of Gifu<br>University Hospital<br>1-1, Yanagido<br>Gifu, Gifu 501-1194                                             | IRB/IEC<br>Approval of<br>Protocol<br>Amendment # 11        | 08-FEB-2018 |
| Japan   | 3475-061 -<br>0593 | Institutional Review Board of Gifu<br>University Hospital<br>1-1, Yanagido<br>Gifu, Gifu 501-1194                                             | IRB/IEC<br>Approval of<br>Protocol<br>Amendment # 2         | 13-AUG-2015 |
| Japan   | 3475-061 -<br>0593 | Institutional Review Board of Gifu<br>University Hospital<br>1-1, Yanagido<br>Gifu, Gifu 501-1194                                             | IRB/IEC<br>Approval of<br>Protocol<br>Amendment # 5         | 17-MAR-2016 |
| Japan   | 3475-061 -<br>0593 | Institutional Review Board of Gifu<br>University Hospital<br>1-1, Yanagido<br>Gifu, Gifu 501-1194                                             | IRB/IEC<br>Approval of<br>Protocol<br>Amendment # 7         | 20-JAN-2017 |
| Japan   | 3475-061 -<br>0593 | Institutional Review Board of Gifu<br>University Hospital<br>1-1, Yanagido<br>Gifu, Gifu 501-1194                                             | IRB/IEC<br>Approval of<br>Protocol<br>Amendment # 9         | 14-NOV-2017 |

|       |                 |                                                                                                                     |                                                      |             |
|-------|-----------------|---------------------------------------------------------------------------------------------------------------------|------------------------------------------------------|-------------|
| Japan | 3475-061 - 0594 | Kumamoto University Hospital<br>Institutional Review Board<br>1-1-1, Honjo, Chuo-ku<br>Kumamoto, Kumamoto 860-8556  | IRB/IEC<br>Approval of<br>Protocol                   | 28-JUL-2015 |
| Japan | 3475-061 - 0594 | Kumamoto University Hospital<br>Institutional Review Board<br>1-1-1, Honjo, Chuo-ku<br>Kumamoto, Kumamoto 860-8556  | IRB/IEC<br>Approval of<br>Protocol<br>Amendment # 2  | 28-JUL-2015 |
| Japan | 3475-061 - 0594 | Kumamoto University Hospital<br>Institutional Review Board<br>1-1-1, Honjo, Chuo-ku<br>Kumamoto, Kumamoto 860-8556  | IRB/IEC<br>Approval of<br>Protocol<br>Amendment # 5  | 01-MAR-2016 |
| Japan | 3475-061 - 0595 | National Hospital Organization<br>Kyushu Cancer Center IRB<br>3-1-1, Notame, Minami-ku<br>Fukuoka, Fukuoka 811-1395 | IRB/IEC<br>Approval of<br>Protocol                   | 15-JUN-2015 |
| Japan | 3475-061 - 0595 | National Hospital Organization<br>Kyushu Cancer Center IRB<br>3-1-1, Notame, Minami-ku<br>Fukuoka, Fukuoka 811-1395 | IRB/IEC<br>Approval of<br>Protocol<br>Amendment # 2  | 11-AUG-2015 |
| Japan | 3475-061 - 0595 | National Hospital Organization<br>Kyushu Cancer Center IRB<br>3-1-1, Notame, Minami-ku<br>Fukuoka, Fukuoka 811-1395 | IRB/IEC<br>Approval of<br>Protocol<br>Amendment # 5  | 04-FEB-2016 |
| Japan | 3475-061 - 0595 | National Hospital Organization<br>Kyushu Cancer Center IRB<br>3-1-1, Notame, Minami-ku<br>Fukuoka, Fukuoka 811-1395 | IRB/IEC<br>Approval of<br>Protocol<br>Amendment # 7  | 12-JAN-2017 |
| Japan | 3475-061 - 0595 | National Hospital Organization<br>Kyushu Cancer Center IRB<br>3-1-1, Notame, Minami-ku<br>Fukuoka, Fukuoka 811-1395 | IRB/IEC<br>Approval of<br>Protocol<br>Amendment # 9  | 07-DEC-2017 |
| Japan | 3475-061 - 0596 | Kyorin University Hospital<br>Institutional Review Board<br>6-20-2, Shinkawa<br>Mitaka, Tokyo 181-8611              | IRB/IEC<br>Approval of<br>Protocol                   | 12-AUG-2015 |
| Japan | 3475-061 - 0596 | Kyorin University Hospital<br>Institutional Review Board<br>6-20-2, Shinkawa<br>Mitaka, Tokyo 181-8611              | IRB/IEC<br>Approval of<br>Protocol<br>Amendment # 11 | 14-FEB-2018 |
| Japan | 3475-061 - 0596 | Kyorin University Hospital<br>Institutional Review Board<br>6-20-2, Shinkawa<br>Mitaka, Tokyo 181-8611              | IRB/IEC<br>Approval of<br>Protocol<br>Amendment # 2  | 12-AUG-2015 |
| Japan | 3475-061 - 0596 | Kyorin University Hospital<br>Institutional Review Board<br>6-20-2, Shinkawa<br>Mitaka, Tokyo 181-8611              | IRB/IEC<br>Approval of<br>Protocol<br>Amendment # 5  | 09-MAR-2016 |
| Japan | 3475-061 - 0596 | Kyorin University Hospital<br>Institutional Review Board<br>6-20-2, Shinkawa<br>Mitaka, Tokyo 181-8611              | IRB/IEC<br>Approval of<br>Protocol<br>Amendment # 7  | 11-JAN-2017 |
| Japan | 3475-061 - 0596 | Kyorin University Hospital<br>Institutional Review Board<br>6-20-2, Shinkawa<br>Mitaka, Tokyo 181-8611              | IRB/IEC<br>Approval of<br>Protocol<br>Amendment # 9  | 08-NOV-2017 |

10 **Figure 1.** Kaplan-Meier curve for overall survival by dual Tcell<sub>inf</sub>GEP and TMB cutoffs.

11 Tcell<sub>inf</sub>GEP, T-cell–inflamed gene expression profile; TMB, tumor mutational burden.

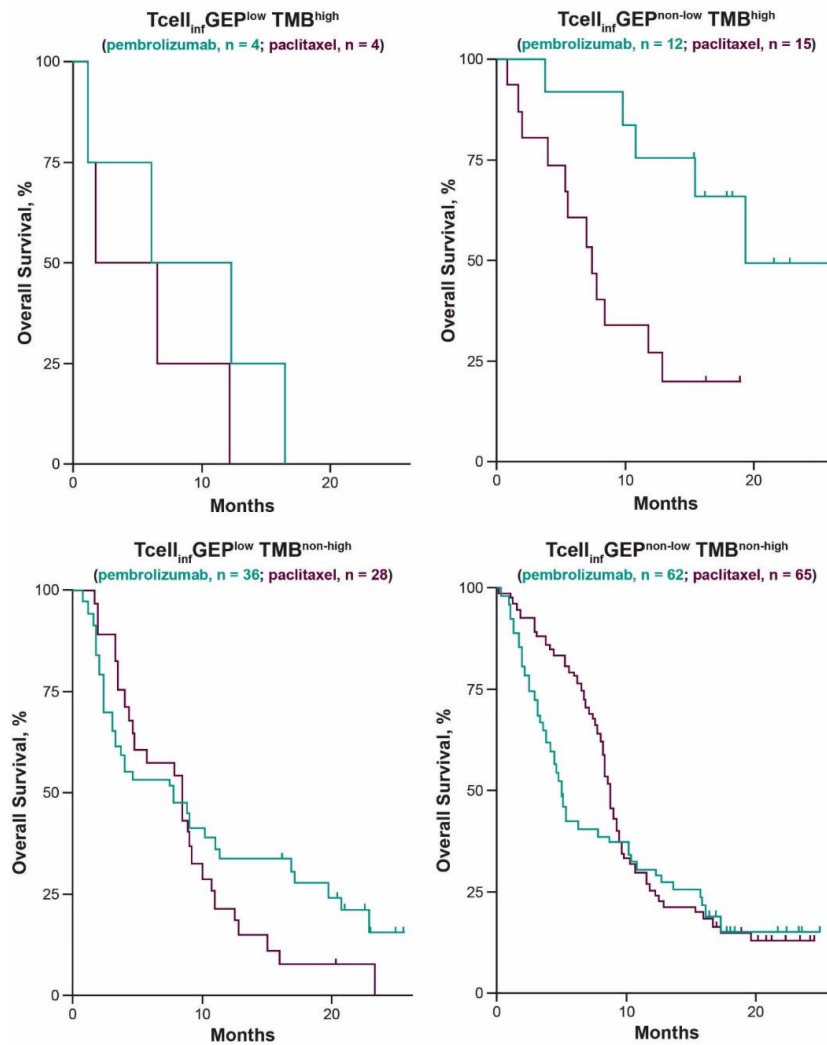

12

13 **Figure 2.** Kaplan-Meier curve for overall survival in patients with non-MSI-H tumors by  
14 Tcell<sub>inf</sub>GEP-adjusted mMDSC cutoff.  
15 CI, confidence interval; HR, hazard ratio; mMDSC, monocytic myeloid-derived suppressor  
16 cell; MSI-H, microsatellite instability-high; Tcell<sub>inf</sub>GEP, T-cell-inflamed gene expression  
17 profile.

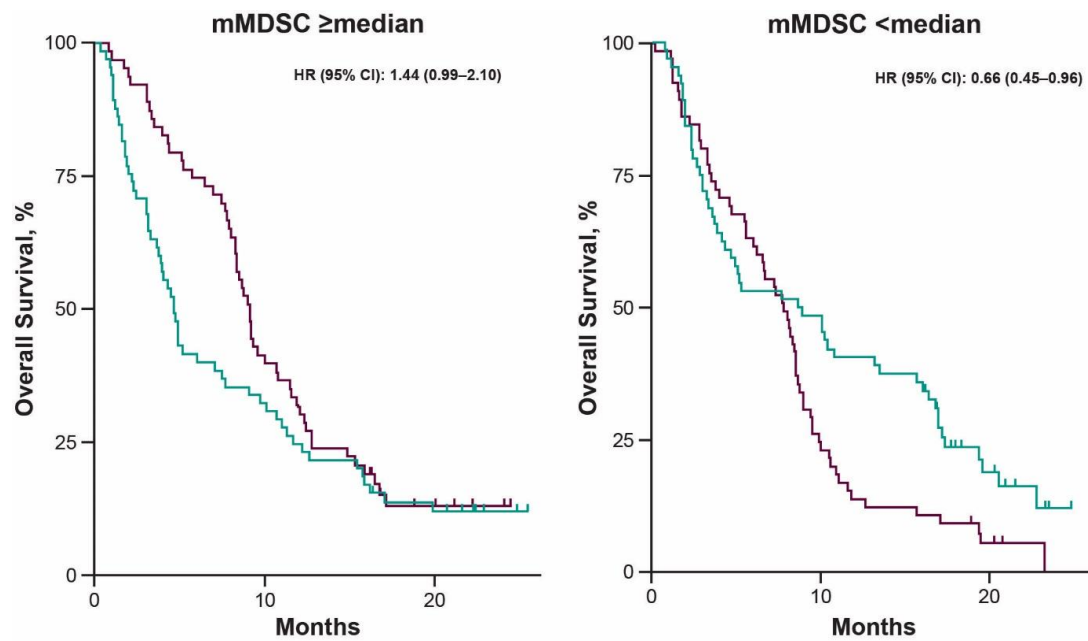

18  
19

20 **Figure 3.** Kaplan-Meier curve for overall survival by Tcell<sub>inf</sub>GEP-adjusted (A) glycolysis,  
 21 (B) proliferation, and (C) MYC cutoffs.  
 22 CI, confidence interval; HR, hazard ratio; mMDSC, monocytic myeloid-derived suppressor  
 23 cell; OS, overall survival; Tcell<sub>inf</sub>GEP, T-cell–inflamed gene expression profile.

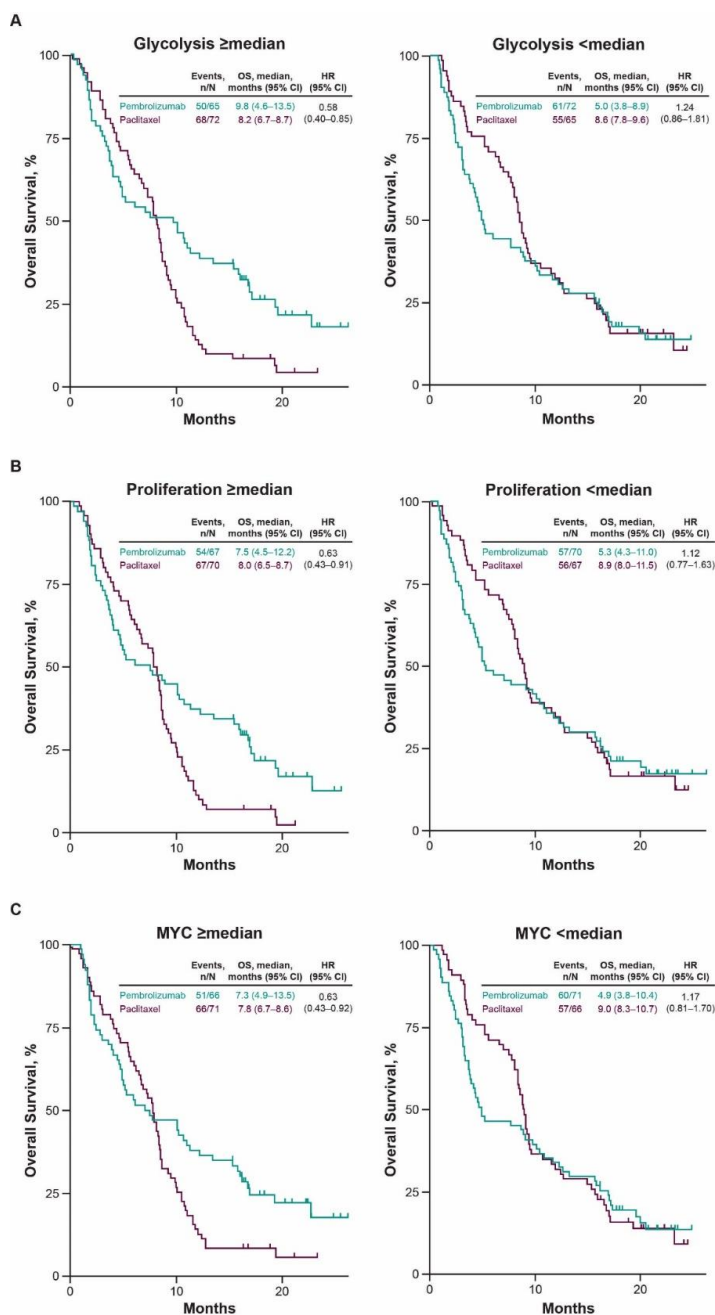

24

25
